# Supplementary material
Source: PubMed Central journal article supplement (PMC5344783)
Supplement: NIHMS842395-supplement-Supp_data.pdf [file NIHMS842395-supplement-Supp_data.pdf]

1 **SUPPLEMENTAL INFORMATION**

2 **Suppression and Synthetic-Lethal Genetic Relationships of *ΔgpsB* Mutations**  
3 **Indicate That GpsB Mediates Protein Phosphorylation and Penicillin-Binding**  
4 **Protein Interactions in *Streptococcus pneumoniae* D39**

5  
6 Britta E. Rued<sup>1§</sup>, Jiaqi J. Zheng<sup>1§</sup>, Andrea Mura<sup>2</sup>, Ho-Ching T. Tsui<sup>1</sup>, Michael J.  
7 Boersma<sup>1</sup>, Jeffrey L. Mazny<sup>1</sup>, Federico Corona<sup>2</sup>, Amilcar J. Perez<sup>1</sup>, Daniela Fadda<sup>2</sup>,  
8 Linda Doubravová<sup>3</sup>, Karolína Buriánková<sup>3</sup>, Pavel Branny<sup>3</sup>, Orietta Massidda<sup>2</sup>, and  
9 Malcolm E. Winkler<sup>1\*</sup>

10  
11 <sup>1</sup>Department of Biology, Indiana University Bloomington, Bloomington, IN 4705, USA

12 <sup>2</sup>Dipartimento di Scienze Chirurgiche, Università di Cagliari, 09100 Cagliari, Italy

13 <sup>3</sup>Cell and Molecular Microbiology Division, Institute of Microbiology, v.v.i., Academy of  
14 Sciences of the Czech Republic, 142 20 Prague 4, Czech Republic

15  
16 Running title: Functions of essential pneumococcal GpsB in division

17  
18 <sup>§</sup>Contributed equally to this work.

19 <sup>\*</sup>Corresponding author E-mail: winklerm@indiana.edu

20  
21 **Tables S1-S8**

22 **Figures Legends for Supplemental Figures S1-S15**

23 **References for Supplemental Information**

**TABLE S1.** *Streptococcus pneumoniae* strains used in this study<sup>a</sup>

| <b><i>S. pneumoniae</i> strains</b> |                                                                                                                                                                                                                                                                                                          |                                    |                                       |
|-------------------------------------|----------------------------------------------------------------------------------------------------------------------------------------------------------------------------------------------------------------------------------------------------------------------------------------------------------|------------------------------------|---------------------------------------|
| Strain Number                       | Genotype (description) <sup>b</sup>                                                                                                                                                                                                                                                                      | Antibiotic resistance <sup>c</sup> | Reference or source                   |
| E46                                 | D39 $\Delta$ <i>cps</i> $\Delta$ <i>bgaA</i> ::P <sub>c</sub> - <i>erm</i> (IU1945 transformed with fusion $\Delta$ <i>bgaA</i> ::P <sub>c</sub> - <i>erm</i> amplicon)                                                                                                                                  | Erm <sup>R</sup>                   | This study                            |
| E177                                | D39 $\Delta$ <i>cps</i> $\Delta$ <i>pbp1a</i> ::P <sub>c</sub> - <i>erm</i>                                                                                                                                                                                                                              | Erm <sup>R</sup>                   | (Land <i>et al.</i> , 2013)           |
| E180                                | D39 $\Delta$ <i>cps</i> $\Delta$ <i>pbp2a</i> ::P <sub>c</sub> - <i>erm</i>                                                                                                                                                                                                                              | Erm <sup>R</sup>                   | (Land <i>et al.</i> , 2013)           |
| E193                                | D39 $\Delta$ <i>cps</i> $\Delta$ <i>pbp1b</i> ::P <sub>c</sub> - <i>erm</i>                                                                                                                                                                                                                              | Erm <sup>R</sup>                   | (Land <i>et al.</i> , 2013)           |
| E736                                | D39 $\Delta$ <i>cps</i> $\Delta$ <i>phpP</i> ::P <sub>c</sub> - <i>erm</i> (IU1945 transformed with fusion $\Delta$ <i>phpP</i> ::P <sub>c</sub> - <i>erm</i> amplicon)                                                                                                                                  | Erm <sup>R</sup>                   | This study                            |
| E739                                | D39 $\Delta$ <i>cps</i> $\Delta$ [ <i>phpP</i> - <i>stkP</i> ]::P <sub>c</sub> - <i>erm</i> (IU1945 transformed with fusion $\Delta$ [ <i>phpP</i> - <i>stkP</i> ]::P <sub>c</sub> - <i>erm</i> amplicon)                                                                                                | Erm <sup>R</sup>                   | This study                            |
| EL59                                | R6                                                                                                                                                                                                                                                                                                       | None                               | (Hoskins <i>et al.</i> , 2001)        |
| IU1690                              | D39                                                                                                                                                                                                                                                                                                      | None                               | (Lanie <i>et al.</i> , 2007)          |
| IU1781                              | D39 <i>rpsL1</i>                                                                                                                                                                                                                                                                                         | Str <sup>R</sup>                   | (Ramos-Montanez <i>et al.</i> , 2008) |
| IU1824                              | D39 <i>rpsL1</i> $\Delta$ <i>cps2A'</i> - <i>cps2H'</i> = D39 <i>rpsL1</i> $\Delta$ <i>cps</i>                                                                                                                                                                                                           | Str <sup>R</sup>                   | (Lanie <i>et al.</i> , 2007)          |
| IU1945                              | D39 $\Delta$ <i>cps</i>                                                                                                                                                                                                                                                                                  | None                               | (Lanie <i>et al.</i> , 2007)          |
| IU3297                              | D39 $\Delta$ <i>cps</i> <i>rpsL1</i> $\Delta$ <i>divIVA</i> ::P <sub>c</sub> -[ <i>kan-rpsL</i> <sup>+</sup> ] (IU1781 transformed with fusion amplicon $\Delta$ <i>divIVA</i> ::P <sub>c</sub> -[ <i>kan-rpsL</i> <sup>+</sup> ])                                                                       | Kan <sup>R</sup>                   | This study                            |
| IU4846                              | D39 $\Delta$ <i>cps</i> $\Delta$ <i>bgaA</i> :: <i>kan-t1t2</i> -P <sub>fcsk</sub> - <i>gpsB</i>                                                                                                                                                                                                         | Kan <sup>R</sup>                   | (Land <i>et al.</i> , 2013)           |
| IU4888                              | D39 $\Delta$ <i>cps</i> $\Delta$ <i>gpsB</i> <> <i>aad9</i> // $\Delta$ <i>bgaA</i> :: <i>kan-t1t2</i> -P <sub>fcsk</sub> - <i>gpsB</i>                                                                                                                                                                  | Kan <sup>R</sup> Spc <sup>R</sup>  | (Land <i>et al.</i> , 2013)           |
| IU5456                              | D39 $\Delta$ <i>cps</i> <i>ezrA</i> -L-FLAG <sup>3</sup> -P <sub>c</sub> - <i>erm</i> (IU1945 transformed with fusion amplicon, <i>ezrA</i> -L-FLAG <sup>3</sup> -P <sub>c</sub> - <i>erm</i> )                                                                                                          | Erm <sup>R</sup>                   | This study                            |
| IU5458                              | D39 $\Delta$ <i>cps</i> <i>gpsB</i> -L-FLAG <sup>3</sup> -P <sub>c</sub> - <i>erm</i>                                                                                                                                                                                                                    | Erm <sup>R</sup>                   | (Land <i>et al.</i> , 2013)           |
| IU5838                              | D39 $\Delta$ <i>cps</i> <i>gpsB</i> -FLAG-P <sub>c</sub> - <i>erm</i>                                                                                                                                                                                                                                    | Erm <sup>R</sup>                   | (Land <i>et al.</i> , 2013)           |
| IU5845                              | D39 $\Delta$ <i>cps</i> $\Delta$ <i>gpsB</i> <> <i>aad9</i> $\Delta$ [ <i>spd1026</i> - <i>spd1037</i> ] $\Omega$ [ <i>spd_0889</i> - <i>spd_1026</i> ] (IU1945 transformed with $\Delta$ <i>gpsB</i> <> <i>aad9</i> amplicon from IU4888, with other mutations arising spontaneously) Sup2 in Figure 3. | Spc <sup>R</sup>                   | This study                            |
| IU6441                              | D39 $\Delta$ <i>cps</i> $\Delta$ <i>gpsB</i> <> <i>aad9</i> $\Delta$ [ <i>spd1029</i> - <i>spd1037</i> ] $\Omega$ [ <i>spd_0889</i> - <i>spd_1024</i> ] (IU1945 transformed with $\Delta$ <i>gpsB</i> <> <i>aad9</i> amplicon from IU4888,                                                               | Spc <sup>R</sup>                   | This study                            |

|        |                                                                                                                                                                                                                                                   |                                   |                             |
|--------|---------------------------------------------------------------------------------------------------------------------------------------------------------------------------------------------------------------------------------------------------|-----------------------------------|-----------------------------|
|        | with other mutations arising spontaneously)<br>Sup3 in Figure 3.                                                                                                                                                                                  |                                   |                             |
| IU6442 | D39 $\Delta cps \Delta gpsB \langle aad9 \textit{phpP}(G229D)$<br>(IU1945 transformed with $\Delta gpsB \langle aad9$<br>amplicon from IU4888, with spontaneous<br>$\textit{phpP}(G229D)$ mutation) Sup1 in Figure 3.                             | Spc <sup>R</sup>                  | This study                  |
| IU6444 | D39 $\Delta cps \Delta aad9 \textit{phpP}(G117D)$ (IU1945<br>transformed with $\Delta cps \Delta aad9$ amplicon from<br>IU4888, with spontaneous $\textit{phpP}(G117D)$<br>mutation)                                                              | Spc <sup>R</sup>                  | This study                  |
| IU6543 | D39 $\Delta cps \textit{pbp2b}$ -FLAG-P <sub>c</sub> - <i>erm</i>                                                                                                                                                                                 | Erm <sup>R</sup>                  | (Tsui <i>et al.</i> , 2014) |
| IU6741 | D39 $\Delta cps \textit{rpsL1} \Delta \textit{pbp1a}$                                                                                                                                                                                             | Str <sup>R</sup>                  | (Tsui <i>et al.</i> , 2016) |
| IU6810 | D39 $\Delta cps \textit{ezrA}$ -HA-P <sub>c</sub> - <i>kan</i> (IU1945<br>transformed with fusion amplicon $\textit{ezrA}$ -HA-P <sub>c</sub> -<br><i>kan</i> )                                                                                   | Kan <sup>R</sup>                  | This study                  |
| IU6929 | D39 $\Delta cps \textit{pbp2x}$ -HA-P <sub>c</sub> - <i>kan</i>                                                                                                                                                                                   | Kan <sup>R</sup>                  | (Land <i>et al.</i> , 2013) |
| IU6933 | D39 $\Delta cps \textit{pbp2b}$ -HA-P <sub>c</sub> - <i>kan</i>                                                                                                                                                                                   | Kan <sup>R</sup>                  | (Tsui <i>et al.</i> , 2014) |
| IU6962 | D39 $\Delta cps \textit{ftsZ}$ -Myc-P <sub>c</sub> - <i>kan</i>                                                                                                                                                                                   | Kan <sup>R</sup>                  | (Land <i>et al.</i> , 2013) |
| IU7242 | D39 $\Delta cps \textit{pbp1a}$ -HA-P <sub>c</sub> - <i>kan</i> (IU1945<br>transformed with fusion $\textit{pbp1a}$ -HA-P <sub>c</sub> - <i>kan</i><br>amplicon)                                                                                  | Kan <sup>R</sup>                  | This study                  |
| IU7426 | D39 $\Delta cps \textit{pbp2b}$ -HA <sup>4</sup> -P <sub>c</sub> - <i>kan</i>                                                                                                                                                                     | Kan <sup>R</sup>                  | (Tsui <i>et al.</i> , 2014) |
| IU7434 | D39 $\Delta cps \textit{stkP}$ -FLAG <sup>2</sup> -P <sub>c</sub> - <i>erm</i>                                                                                                                                                                    | Erm <sup>R</sup>                  | (Tsui <i>et al.</i> , 2014) |
| IU7438 | D39 $\Delta cps \textit{stkP}$ -HA-P <sub>c</sub> - <i>kan</i>                                                                                                                                                                                    | Kan <sup>R</sup>                  | (Tsui <i>et al.</i> , 2014) |
| IU7510 | D39 $\Delta cps \textit{pbp2x}$ -HA-P <sub>c</sub> - <i>kan</i> $\textit{stkP}$ -FLAG <sup>2</sup> -P <sub>c</sub> -<br><i>erm</i>                                                                                                                | Kan <sup>R</sup> Erm <sup>R</sup> | (Tsui <i>et al.</i> , 2014) |
| IU7512 | D39 $\Delta cps \textit{pbp2b}$ -HA-P <sub>c</sub> - <i>kan</i> $\textit{stkP}$ -FLAG <sup>2</sup> -P <sub>c</sub> -<br><i>erm</i>                                                                                                                | Kan <sup>R</sup> Erm <sup>R</sup> | (Tsui <i>et al.</i> , 2014) |
| IU7614 | D39 $\Delta cps \textit{rpsL1} \textit{ftsZ}$ -P <sub>c</sub> -[ <i>kan-rpsL</i> <sup>+</sup> ] (IU1824<br>transformed with fusion amplicon, $\textit{ftsZ}$ -P <sub>c</sub> -<br>[ <i>kan-rpsL</i> <sup>+</sup> ])                               | Kan <sup>R</sup>                  | (Tsui <i>et al.</i> , 2016) |
| IU7644 | D39 $\Delta cps \textit{pbp2b}$ -HA <sup>4</sup> -P <sub>c</sub> - <i>erm</i> (IU1945<br>transformed with $\textit{pbp2b}$ -HA <sup>4</sup> -P <sub>c</sub> - <i>erm</i> fusion<br>amplicon)                                                      | Erm <sup>R</sup>                  | This study                  |
| IU7649 | D39 $\Delta cps \textit{phpP}^+$ -P <sub>c</sub> -[ <i>kan-rpsL</i> <sup>+</sup> ] (IU1945 was<br>transformed with fusion amplicon $\textit{phpP}^+$ -P <sub>c</sub> -<br>[ <i>kan-rpsL</i> <sup>+</sup> ])                                       | Kan <sup>R</sup>                  | This study                  |
| IU7667 | D39 $\Delta cps \textit{rpsL1} \textit{ftsZ}$ -Myc (IU7614 transformed<br>with fusion amplicon, $\textit{ftsZ}$ -Myc)                                                                                                                             | Str <sup>R</sup>                  | This study                  |
| IU7673 | D39 $\Delta cps \textit{rpsL1} \textit{phpP}^+$ -P <sub>c</sub> -[ <i>kan-rpsL</i> <sup>+</sup> ]- $\textit{stkP}^+$<br>(IU1824 was transformed with $\textit{phpP}^+$ -P <sub>c</sub> -[ <i>kan</i> -<br><i>rpsL</i> <sup>+</sup> ] from IU7649) | Kan <sup>R</sup>                  | This study                  |
| IU7685 | D39 $\Delta cps \textit{rpsL1} \textit{phpP}(G229D) \textit{stkP}(G10\textit{stop})$<br>(IU7673 was transformed with $\textit{phpP}(G229D)$<br>amplicon from IU6442 with spontaneous<br>$\textit{stkP}(G10 \textit{stop})$ mutation)              | Str <sup>R</sup>                  | This study                  |

|                   |                                                                                                                                                                                                                                                                                 |                                                           |                              |
|-------------------|---------------------------------------------------------------------------------------------------------------------------------------------------------------------------------------------------------------------------------------------------------------------------------|-----------------------------------------------------------|------------------------------|
| IU7733            | D39 $\Delta cps$ <i>rpsL1</i> $\Delta gpsB$ <> <i>aad9</i> <i>phpP</i> (G229D) <i>stkP</i> (G10 stop) (IU7685 was transformed with $\Delta gpsB$ <> <i>aad9</i> from IU4888)                                                                                                    | Spc <sup>R</sup> , Str <sup>R</sup>                       | This study                   |
| IU7736            | D39 $\Delta cps$ <i>rpsL1</i> $\Delta gpsB$ <> <i>aad9</i> <i>phpP</i> (T163P) (IU1824 was transformed with $\Delta gpsB$ <> <i>aad9</i> from IU4888 with spontaneous <i>phpP</i> (T163P) mutation)                                                                             | Spc <sup>R</sup> , Str <sup>R</sup>                       | This study                   |
| IU7797            | D39 $\Delta cps$ <i>pbp2a</i> -HA <sup>4</sup> -P <sub>c</sub> - <i>erm</i> (IU1945 transformed with fusion <i>pbp2a</i> -HA <sup>4</sup> -P <sub>c</sub> - <i>erm</i> amplicon)                                                                                                | Erm <sup>R</sup>                                          | This study                   |
| IU7824            | D39 $\Delta cps$ $\Delta$ [ <i>spd_1031-1037</i> ]:P <sub>c</sub> - <i>erm</i> (IU1945 transformed with fusion $\Delta$ [ <i>spd_1031-1037</i> ]:P <sub>c</sub> - <i>erm</i> amplicon)                                                                                          | Erm <sup>R</sup>                                          | This study                   |
| IU7921-<br>IU7922 | D39 $\Delta cps$ $\Delta$ <i>stkP</i> :P <sub>c</sub> -[ <i>kan-rpsL</i> <sup>+</sup> ] (IU1945 transformed with fusion $\Delta$ <i>stkP</i> :P <sub>c</sub> -[ <i>kan-rpsL</i> <sup>+</sup> ] amplicon)                                                                        | Kan <sup>R</sup>                                          | This study                   |
| IU7923            | D39 $\Delta cps$ $\Delta$ <i>stkP</i> :P <sub>c</sub> - <i>erm</i> (IU1945 transformed with fusion $\Delta$ <i>stkP</i> :P <sub>c</sub> - <i>erm</i> amplicon)                                                                                                                  | Erm <sup>R</sup>                                          | This study                   |
| IU8224            | R6 $\Delta gpsB$ <> <i>aad9</i> (EL59 transformed with $\Delta gpsB$ <> <i>aad9</i> amplicon from IU4888)                                                                                                                                                                       | Spc <sup>R</sup>                                          | This study                   |
| IU8230            | D39 $\Delta cps$ $\Delta gpsB$ <> <i>aad9</i> / $\Delta bgaA$ :: <i>kan-t1t2</i> -P <sub>icsk</sub> - <i>gpsB</i> <i>stkP</i> -FLAG <sup>2</sup> -P <sub>c</sub> - <i>erm</i> (IU4888 transformed with <i>stkP</i> -FLAG <sup>2</sup> -P <sub>c</sub> - <i>erm</i> from IU7434) | Spc <sup>R</sup> , Kan <sup>R</sup> ,<br>Erm <sup>R</sup> | This study                   |
| IU8271            | D39 $\Delta cps$ $\Delta$ [ <i>spd_1029-1037</i> ]:P <sub>c</sub> -[ <i>kan-rpsL</i> <sup>+</sup> ] (IU7824 transformed with fusion $\Delta$ [ <i>spd_1029-1037</i> ]:P <sub>c</sub> -[ <i>kan-rpsL</i> <sup>+</sup> ] amplicon)                                                | Kan <sup>R</sup>                                          | This study                   |
| IU8311            | R6 $\Delta gpsB$ <> <i>aad9</i> <i>stkP</i> -FLAG <sup>2</sup> -P <sub>c</sub> - <i>erm</i> (IU8224 transformed with <i>stkP</i> -FLAG <sup>2</sup> -P <sub>c</sub> - <i>erm</i> from IU7434)                                                                                   | Spc <sup>R</sup> , Erm <sup>R</sup>                       | This study                   |
| IU8369            | R6 $\Delta gpsB$ <> <i>aad9</i> $\Delta$ <i>divIVA</i> :P <sub>c</sub> -[ <i>kan-rpsL</i> <sup>+</sup> ] (IU8224 transformed with $\Delta$ <i>divIVA</i> :P <sub>c</sub> -[ <i>kan-rpsL</i> <sup>+</sup> ] from IU3297)                                                         | Spc <sup>R</sup> , Kan <sup>R</sup>                       | This study                   |
| IU8371            | R6 $\Delta$ <i>divIVA</i> :P <sub>c</sub> -[ <i>kan-rpsL</i> <sup>+</sup> ] (EL59 transformed with $\Delta$ <i>divIVA</i> :P <sub>c</sub> -[ <i>kan-rpsL</i> <sup>+</sup> ] from IU3297)                                                                                        | Kan <sup>R</sup>                                          | This study                   |
| IU8419            | R6 $\Delta$ [ <i>phpP-stkP</i> ]:P <sub>c</sub> -[ <i>kan-rpsL</i> <sup>+</sup> ] (EL59 transformed with $\Delta$ [ <i>phpP-stkP</i> ]:P <sub>c</sub> -[ <i>kan-rpsL</i> <sup>+</sup> ] amplicon from K739)                                                                     | Kan <sup>R</sup>                                          | This study                   |
| IU8496            | D39 $\Delta cps$ $\Delta$ <i>divIVA</i> :P <sub>c</sub> - <i>erm</i> (IU1945 transformed with fusion $\Delta$ <i>divIVA</i> :P <sub>c</sub> - <i>erm</i> amplicon)                                                                                                              | Erm <sup>R</sup>                                          | This study                   |
| IU8681            | D39 $\Delta cps$ <i>rpsL1</i> <i>ftsZ</i> -Myc <i>eZR</i> A-L-FLAG <sup>3</sup> -P <sub>c</sub> - <i>erm</i> (IU7667 transformed with <i>eZR</i> A-L-FLAG <sup>3</sup> -P <sub>c</sub> - <i>erm</i> from IU5456)                                                                | Erm <sup>R</sup> , Str <sup>R</sup>                       | This study                   |
| IU8805            | D39 <i>rpsL1</i> $\Delta cps$ <i>phpP</i> (G229D) (IU7673 transformed with <i>phpP</i> (G229D) from IU6442)                                                                                                                                                                     | Str <sup>R</sup>                                          | This study                   |
| IU8819            | R6 <i>stkP</i> -FLAG <sup>2</sup> -P <sub>c</sub> - <i>erm</i> (EL59 transformed with <i>stkP</i> -FLAG <sup>2</sup> -P <sub>c</sub> - <i>erm</i> from IU7434)                                                                                                                  | Erm <sup>R</sup>                                          | This study                   |
| IU9256            | Rx1                                                                                                                                                                                                                                                                             | None                                                      | (Pozzi <i>et al.</i> , 1996) |
| IU9262            | Rx1 $\Delta gpsB$ : <i>cat</i> <i>phpP</i> (L148S) (IU9256)                                                                                                                                                                                                                     | Cm <sup>R</sup>                                           | This study (See              |

|                                                         |                                                                                                                                                                                                                                 |                                     |                                            |
|---------------------------------------------------------|---------------------------------------------------------------------------------------------------------------------------------------------------------------------------------------------------------------------------------|-------------------------------------|--------------------------------------------|
|                                                         | transformed with $\Delta gpsB::cat$ fusion amplicon, with spontaneous <i>phpP</i> (L148S) mutation)                                                                                                                             |                                     | Table S3 for construction)                 |
| IU9264                                                  | Rx1 $\Delta divIVA::erm$                                                                                                                                                                                                        | Erm <sup>R</sup>                    | (Fadda <i>et al.</i> , 2003)               |
| IU9266                                                  | Rx1 $\Delta divIVA::erm \Delta gpsB::cat phpP$ (L148S) (IU9262 transformed with $\Delta divIVA::erm$ amplicon from IU9264)                                                                                                      | Cm <sup>R</sup> , Erm <sup>R</sup>  | This study (See Table S3 for construction) |
| IU9713                                                  | D39 $\Delta cps rpsL1 ftsZ$ -Myc <i>eZR</i> A-HA-P <sub>c</sub> - <i>kan</i> (IU7667 transformed with <i>eZR</i> A-HA-P <sub>c</sub> - <i>kan</i> amplicon from IU6810)                                                         | Kan <sup>R</sup> , Str <sup>R</sup> | This study                                 |
| IU9767 <sup>d</sup>                                     | D39 $\Delta cps rpsL1 P_c$ -[ <i>kan-rpsL</i> <sup>+</sup> ]- <i>ftsA</i> <sup>+</sup> IU1824 transformed with P <sub>c</sub> -[ <i>kan-rpsL</i> <sup>+</sup> ]- <i>ftsA</i> <sup>+</sup> fusion amplicon.                      | Kan <sup>R</sup>                    | This study                                 |
| IU9913                                                  | D39 $\Delta cps divIVA$ -HA <sup>2</sup> -P <sub>c</sub> - <i>kan</i> (IU1945 transformed with <i>divIVA</i> -HA <sup>2</sup> -P <sub>c</sub> - <i>kan</i> fusion amplicon)                                                     | Kan <sup>R</sup>                    | This study                                 |
| IU9967                                                  | D39 $\Delta cps rpsL1 HA$ - <i>ftsA</i> (IU9767 transformed with HA- <i>ftsA</i> fusion amplicon)                                                                                                                               | Str <sup>R</sup>                    | This study                                 |
| U10107                                                  | D39 $\Delta cps \Delta gpsB<>aad9 \Delta [phpP-stkP]::P_c-erm$ (E739 $\Delta [phpP-stkP]::P_c-erm$ transformed with $\Delta gpsB<>aad9$ from IU4888)                                                                            | Spc <sup>R</sup> , Erm <sup>R</sup> | This study                                 |
| IU10109                                                 | D39 $\Delta cps \Delta gpsB<>aad9 \Delta stkP::P_c$ -[ <i>kan-rpsL</i> <sup>+</sup> ] (IU7922 transformed with $\Delta gpsB<>aad9$ from IU4888)                                                                                 | Kan <sup>R</sup> , Spc <sup>R</sup> | This study                                 |
| IU10129,<br>IU10138-<br>IU10139,<br>IU10156-<br>IU10157 | D39 $\Delta cps \Delta gpsB<>aad9/\Delta bgaA::kan-t1t2-P_{fcsk}$ - <i>gpsB phpP</i> (G229D) (IU4888 transformed with <i>phpP</i> (G229D) from IU6442, without fucose)                                                          | Kan <sup>R</sup> , Spc <sup>R</sup> | This study                                 |
| IU10180,<br>IU10191                                     | D39 $\Delta cps \Delta gpsB<>aad9/\Delta bgaA::kan-t1t2-P_{fcsk}$ - <i>gpsB phpP</i> (D192A) (IU4888 transformed with <i>phpP</i> (D192A) fusion amplicon, without fucose)                                                      | Kan <sup>R</sup> , Spc <sup>R</sup> | This study                                 |
| IU10234                                                 | D39 $\Delta cps rpsL1 HA$ - <i>ftsA ftsZ</i> -P <sub>c</sub> -[ <i>kan-rpsL</i> <sup>+</sup> ] (IU9967 transformed with <i>ftsZ</i> -P <sub>c</sub> -[ <i>kan-rpsL</i> <sup>+</sup> ] amplicon from IU7614)                     | Kan <sup>R</sup> , Str <sup>R</sup> | This study                                 |
| IU10302                                                 | D39 $\Delta cps rpsL1 HA$ - <i>ftsA ftsZ</i> -Myc (IU10234 transformed with <i>ftsZ</i> -Myc amplicon from IU7667)                                                                                                              | Str <sup>R</sup>                    | This study                                 |
| IU10349-<br>IU10350,<br>IU10363                         | D39 $\Delta cps \Delta gpsB<>aad9/\Delta bgaA::kan-t1t2-P_{fcsk}$ - <i>gpsB phpP</i> (D192A) (IU4888 transformed with <i>phpP</i> (D192A) fusion amplicon, without fucose)                                                      | Kan <sup>R</sup> , Spc <sup>R</sup> | This study                                 |
| IU10423-<br>IU10424                                     | D39 $\Delta cps rpsL1 phpP(G229D) (IU7673 transformed with phpP(G229D) from IU6442)$                                                                                                                                            | Str <sup>R</sup>                    | This study                                 |
| IU11183                                                 | D39 $\Delta phpP::P_c-erm$ (IU1690 transformed with $\Delta phpP::P_c-erm$ from E736)                                                                                                                                           | Erm <sup>R</sup>                    | This study                                 |
| IU11187                                                 | D39 <i>rpsL1 phpP</i> <sup>+</sup> -P <sub>c</sub> -[ <i>kan-rpsL</i> <sup>+</sup> ]- <i>stkP</i> <sup>+</sup> (IU1781 transformed with <i>phpP</i> <sup>+</sup> -P <sub>c</sub> -[ <i>kan-rpsL</i> <sup>+</sup> ] from IU7673) | Kan <sup>R</sup>                    | This study                                 |
| IU11195                                                 | D39 <i>rpsL1 phpP</i> (G229D) (IU11187)                                                                                                                                                                                         | Str <sup>R</sup>                    | This study                                 |

|         |                                                                                                                                                                                                                                                   |                                                        |            |
|---------|---------------------------------------------------------------------------------------------------------------------------------------------------------------------------------------------------------------------------------------------------|--------------------------------------------------------|------------|
|         | transformed with <i>phpP</i> (G229D) from IU6442)                                                                                                                                                                                                 |                                                        |            |
| IU11205 | D39 $\Delta$ <i>cps</i> $\Delta$ <i>gpsB</i> <> <i>aad9</i> <i>phpP</i> (G229D) $\Delta$ <i>divIVA</i> ::P <sub>c</sub> - <i>erm</i> (IU6442 transformed with $\Delta$ <i>divIVA</i> ::P <sub>c</sub> - <i>erm</i> from IU8496)                   | Spc <sup>R</sup> , Erm <sup>R</sup>                    | This study |
| IU11221 | D39 $\Delta$ <i>cps</i> $\Delta$ <i>gpsB</i> <> <i>aad9</i> $\Delta$ <i>bgaA</i> ::P <sub>c</sub> - <i>erm</i> <i>phpP</i> (G229D) (IU10129 transformed with $\Delta$ <i>bgaA</i> ::P <sub>c</sub> - <i>erm</i> amplicon from E46)                | Spc <sup>R</sup> , Erm <sup>R</sup>                    | This study |
| IU11223 | D39 $\Delta$ <i>cps</i> <i>rpsL1</i> <i>phpP</i> (D192A) (IU7673 transformed with <i>phpP</i> (D192A) from IU10191)                                                                                                                               | Str <sup>R</sup>                                       | This study |
| IU11227 | D39 <i>rpsL1</i> <i>phpP</i> (D192A) (IU11187 transformed with <i>phpP</i> (D192A) from IU10191)                                                                                                                                                  | Str <sup>R</sup>                                       | This study |
| IU11238 | D39 $\Delta$ <i>cps</i> $\Delta$ <i>gpsB</i> <> <i>aad9</i> $\Delta$ <i>bgaA</i> ::P <sub>c</sub> - <i>erm</i> <i>phpP</i> (D192A) (IU10191 transformed with $\Delta$ <i>bgaA</i> ::P <sub>c</sub> - <i>erm</i> amplicon from E46)                | Spc <sup>R</sup> , Erm <sup>R</sup>                    | This study |
| IU11240 | D39 $\Delta$ <i>cps</i> <i>rpsL1</i> <i>phpP</i> (D192A) (IU7673 transformed with <i>phpP</i> (D192A) from IU10191)                                                                                                                               | Str <sup>R</sup>                                       | This study |
| IU11314 | D39 $\Delta$ <i>cps</i> <i>pbp2x</i> -HA-P <sub>c</sub> - <i>kan</i> <i>gpsB</i> -L-FLAG <sup>3</sup> -P <sub>c</sub> - <i>erm</i> (IU6929 transformed with <i>gpsB</i> -L-FLAG <sup>3</sup> -P <sub>c</sub> - <i>erm</i> amplicon from IU5458)   | Kan <sup>R</sup> , Erm <sup>R</sup>                    | This study |
| IU11316 | D39 $\Delta$ <i>cps</i> <i>pbp2b</i> -HA-P <sub>c</sub> - <i>kan</i> <i>gpsB</i> -L-FLAG <sup>3</sup> -P <sub>c</sub> - <i>erm</i> (IU6933 transformed with <i>gpsB</i> -L-FLAG <sup>3</sup> -P <sub>c</sub> - <i>erm</i> amplicon from IU5458)   | Kan <sup>R</sup> , Erm <sup>R</sup>                    | This study |
| IU11340 | D39 $\Delta$ <i>cps</i> <i>rpsL1</i> <i>ezrA</i> -L-FLAG <sup>3</sup> -P <sub>c</sub> - <i>erm</i> HA- <i>ftsA</i> <i>ftsZ</i> -Myc (IU10302 transformed with <i>ezrA</i> -L-FLAG <sup>3</sup> -P <sub>c</sub> - <i>erm</i> amplicon from IU5456) | Erm <sup>R</sup> , Str <sup>R</sup>                    | This study |
| IU11342 | D39 $\Delta$ <i>cps</i> $\Delta$ <i>gpsB</i> <> <i>aad9</i> $\Delta$ <i>phpP</i> ::P <sub>c</sub> - <i>erm</i> (E736 transformed with $\Delta$ <i>gpsB</i> <> <i>aad9</i> from IU4888)                                                            | Spc <sup>R</sup> , Erm <sup>R</sup>                    | This study |
| IU11344 | D39 $\Delta$ <i>cps</i> <i>rpsL1</i> $\Delta$ <i>gpsB</i> <> <i>aad9</i> <i>phpP</i> (G229D) (IU8805 transformed with $\Delta$ <i>gpsB</i> <> <i>aad9</i> from IU4888)                                                                            | Spc <sup>R</sup> , Str <sup>R</sup>                    | This study |
| IU11346 | D39 $\Delta$ <i>cps</i> <i>rpsL1</i> $\Delta$ <i>gpsB</i> <> <i>aad9</i> <i>phpP</i> (G229D) (IU10423 transformed with $\Delta$ <i>gpsB</i> <> <i>aad9</i> from IU4888)                                                                           | Spc <sup>R</sup> , Str <sup>R</sup>                    | This study |
| IU11348 | D39 $\Delta$ <i>cps</i> <i>rpsL1</i> $\Delta$ <i>gpsB</i> <> <i>aad9</i> <i>rpsL1</i> <i>phpP</i> (D192A) (IU11223 transformed with $\Delta$ <i>gpsB</i> <> <i>aad9</i> from IU4888)                                                              | Spc <sup>R</sup> , Str <sup>R</sup>                    | This study |
| IU11350 | D39 $\Delta$ <i>gpsB</i> <> <i>aad9</i> $\Delta$ <i>phpP</i> ::P <sub>c</sub> - <i>erm</i> (IU11183 transformed with $\Delta$ <i>gpsB</i> <> <i>aad9</i> from IU4888)                                                                             | Spc <sup>R</sup> , Erm <sup>R</sup>                    | This study |
| IU11352 | D39 <i>rpsL1</i> $\Delta$ <i>gpsB</i> <> <i>aad9</i> <i>phpP</i> (G229D) (IU11195 transformed with $\Delta$ <i>gpsB</i> <> <i>aad9</i> from IU4888)                                                                                               | Spc <sup>R</sup> , Str <sup>R</sup>                    | This study |
| IU11354 | D39 <i>rpsL1</i> $\Delta$ <i>gpsB</i> <> <i>aad9</i> <i>phpP</i> (D192A) (IU11227 transformed with with $\Delta$ <i>gpsB</i> <> <i>aad9</i> from IU4888)                                                                                          | Spc <sup>R</sup> , Str <sup>R</sup>                    | This study |
| IU11412 | D39 $\Delta$ <i>cps</i> <i>stkP</i> -HA-P <sub>c</sub> - <i>kan</i> <i>gpsB</i> -L-FLAG <sup>3</sup> -P <sub>c</sub> - <i>erm</i> (IU7438 transformed with <i>gpsB</i> -L-FLAG <sup>3</sup> -P <sub>c</sub> - <i>erm</i> amplicon from IU5458)    | Kan <sup>R</sup> , Erm <sup>R</sup>                    | This study |
| IU11428 | D39 $\Delta$ <i>cps</i> <i>rpsL1</i> <i>ftsZ</i> -Myc <i>ezrA</i> -HA-P <sub>c</sub> - <i>kan</i> <i>gpsB</i> -L-FLAG <sup>3</sup> -P <sub>c</sub> - <i>erm</i> (IU9713 transformed                                                               | Erm <sup>R</sup> , Kan <sup>R</sup> , Str <sup>R</sup> | This Study |

|                     |                                                                                                                                                                                                                                                       |                                     |            |
|---------------------|-------------------------------------------------------------------------------------------------------------------------------------------------------------------------------------------------------------------------------------------------------|-------------------------------------|------------|
|                     | with <i>gpsB</i> -L-FLAG <sup>3</sup> -P <sub>c</sub> - <i>erm</i> from IU5458)                                                                                                                                                                       |                                     |            |
| IU11432             | D39 $\Delta$ <i>cps rpsL1</i> HA- <i>ftsA ftsZ</i> -Myc <i>gpsB</i> -L-FLAG <sup>3</sup> -P <sub>c</sub> - <i>erm</i> (IU10302 transformed with <i>gpsB</i> -L-FLAG <sup>3</sup> -P <sub>c</sub> - <i>erm</i> from IU5458)                            | Erm <sup>R</sup> , Str <sup>R</sup> | This Study |
| IU11438             | D39 $\Delta$ <i>phpP</i> ::P <sub>c</sub> - <i>erm</i> (IU1690 transformed with $\Delta$ <i>phpP</i> ::P <sub>c</sub> - <i>erm</i> from E736)                                                                                                         | Erm <sup>R</sup>                    | This study |
| IU11442             | D39 $\Delta$ <i>cps</i> $\Delta$ <i>phpP</i> ::P <sub>c</sub> - <i>erm</i> (IU1945 transformed with $\Delta$ <i>phpP</i> ::P <sub>c</sub> - <i>erm</i> from E736)                                                                                     | Erm <sup>R</sup>                    | This study |
| IU11456             | D39 $\Delta$ <i>stkP</i> ::P <sub>c</sub> - <i>erm</i> (IU1690 transformed with $\Delta$ <i>stkP</i> ::P <sub>c</sub> - <i>erm</i> from IU7923)                                                                                                       | Erm <sup>R</sup>                    | This study |
| IU11458,<br>IU11459 | D39 $\Delta$ [ <i>phpP</i> - <i>stkP</i> ]::P <sub>c</sub> - <i>erm</i> (IU1690 transformed with $\Delta$ [ <i>phpP</i> - <i>stkP</i> ]::P <sub>c</sub> - <i>erm</i> from E739)                                                                       | Erm <sup>R</sup>                    | This study |
| IU11460             | D39 $\Delta$ <i>cps</i> $\Delta$ <i>stkP</i> ::P <sub>c</sub> - <i>erm</i> (IU1945 transformed with $\Delta$ <i>stkP</i> ::P <sub>c</sub> - <i>erm</i> from IU7923)                                                                                   | Erm <sup>R</sup>                    | This study |
| IU11462             | D39 $\Delta$ <i>cps</i> $\Delta$ [ <i>phpP</i> - <i>stkP</i> ]::P <sub>c</sub> - <i>erm</i> (IU1945 transformed with $\Delta$ [ <i>phpP</i> - <i>stkP</i> ]::P <sub>c</sub> - <i>erm</i> from E739)                                                   | Erm <sup>R</sup>                    | This study |
| IU11502             | D39 $\Delta$ <i>gpsB</i> <> <i>aad9</i> $\Delta$ <i>phpP</i> ::P <sub>c</sub> - <i>erm</i> (IU11438 transformed with $\Delta$ <i>gpsB</i> <> <i>aad9</i> from IU4888)                                                                                 | Spc <sup>R</sup> , Erm <sup>R</sup> | This study |
| IU11504-<br>IU11505 | D39 $\Delta$ <i>gpsB</i> <> <i>aad9</i> $\Delta$ <i>stkP</i> ::P <sub>c</sub> - <i>erm</i> (IU11456 transformed with $\Delta$ <i>gpsB</i> <> <i>aad9</i> from IU4888)                                                                                 | Spc <sup>R</sup> , Erm <sup>R</sup> | This study |
| IU11506-<br>IU11507 | D39 $\Delta$ <i>gpsB</i> <> <i>aad9</i> $\Delta$ [ <i>phpP</i> - <i>stkP</i> ]::P <sub>c</sub> - <i>erm</i> (IU11458 transformed with $\Delta$ <i>gpsB</i> <> <i>aad9</i> from IU4888)                                                                | Spc <sup>R</sup> , Erm <sup>R</sup> | This study |
| IU11508             | D39 $\Delta$ <i>cps</i> $\Delta$ <i>gpsB</i> <> <i>aad9</i> $\Delta$ <i>phpP</i> ::P <sub>c</sub> - <i>erm</i> (IU11442 transformed with $\Delta$ <i>gpsB</i> <> <i>aad9</i> from IU4888)                                                             | Spc <sup>R</sup> , Erm <sup>R</sup> | This study |
| IU11512             | D39 $\Delta$ <i>cps</i> $\Delta$ <i>gpsB</i> <> <i>aad9</i> $\Delta$ [ <i>phpP</i> - <i>stkP</i> ]::P <sub>c</sub> - <i>erm</i> (IU11462 transformed with $\Delta$ <i>gpsB</i> <> <i>aad9</i> from IU4888)                                            | Spc <sup>R</sup> , Erm <sup>R</sup> | This study |
| IU11514             | D39 $\Delta$ <i>cps</i> <i>divIVA</i> -Myc-P <sub>c</sub> - <i>kan</i> <i>gpsB</i> -L-FLAG <sup>3</sup> -P <sub>c</sub> - <i>erm</i> (IU5458 transformed with <i>divIVA</i> -Myc-P <sub>c</sub> - <i>kan</i> fusion amplicon)                         | Kan <sup>R</sup> Erm <sup>R</sup>   | This study |
| IU11516             | D39 $\Delta$ <i>cps</i> <i>pbp2a</i> -HA <sup>4</sup> -P <sub>c</sub> - <i>kan</i> <i>gpsB</i> -L-FLAG <sup>3</sup> -P <sub>c</sub> - <i>erm</i> (IU5458 transformed with <i>pbp2a</i> -HA <sup>4</sup> -P <sub>c</sub> - <i>kan</i> fusion amplicon) | Kan <sup>R</sup> Erm <sup>R</sup>   | This study |
| IU11546             | D39 $\Delta$ <i>cps</i> $\Delta$ <i>gpsB</i> <> <i>aad9</i> $\Delta$ <i>stkP</i> ::P <sub>c</sub> - <i>erm</i> (IU11460 transformed with <i>gpsB</i> <> <i>aad9</i> from IU4888)                                                                      | Spc <sup>R</sup> , Erm <sup>R</sup> | This study |
| IU11558             | D39 $\Delta$ <i>cps</i> <i>divIVA</i> -Myc-P <sub>c</sub> - <i>kan</i> (IU1945 transformed with <i>divIVA</i> -Myc-P <sub>c</sub> - <i>kan</i> amplicon from IU11514)                                                                                 | Kan <sup>R</sup>                    | This study |
| IU11560             | D39 $\Delta$ <i>cps</i> <i>pbp2a</i> -HA <sup>4</sup> -P <sub>c</sub> - <i>kan</i> (IU1945 transformed with <i>pbp2a</i> -HA <sup>4</sup> -P <sub>c</sub> - <i>kan</i> amplicon from IU11516)                                                         | Kan <sup>R</sup>                    | This study |
| IU11566             | D39 $\Delta$ <i>cps</i> <i>pbp1a</i> -HA-P <sub>c</sub> - <i>kan</i> <i>gpsB</i> -L-FLAG <sup>3</sup> -P <sub>c</sub> - <i>erm</i> (IU7242 transformed with <i>gpsB</i> -L-FLAG <sup>3</sup> -P <sub>c</sub> - <i>erm</i> amplicon from IU5458)       | Kan <sup>R</sup> , Erm <sup>R</sup> | This study |
| IU11574             | Rx1 $\Delta$ <i>gpsB</i> <> <i>aad9</i> <i>phpP</i> <sup>+</sup> - <i>stkP</i> <sup>+</sup> (IU9256)                                                                                                                                                  | Spc <sup>R</sup>                    | This study |

|         |                                                                                                                                                                                                                          |                                     |            |
|---------|--------------------------------------------------------------------------------------------------------------------------------------------------------------------------------------------------------------------------|-------------------------------------|------------|
|         | transformed with $\Delta gpsB<>aad9$ from IU4888)                                                                                                                                                                        |                                     |            |
| IU11716 | D39 $\Delta cps$ $gpsB$ -FLAG- $P_c$ - $erm$ $stkP$ -HA- $P_c$ - $kan$ (IU5838 transformed with $stkP$ -HA- $P_c$ - $kan$ from IU7438)                                                                                   | Kan <sup>R</sup> , Erm <sup>R</sup> | This study |
| IU11955 | D39 $\Delta cps$ $\Delta gpsB<>aad9$ $phpP$ (R125P) (IU1945 transformed with $\Delta gpsB<>aad9$ from IU4888, with spontaneous $phpP$ (R125P) mutation)                                                                  | Spc <sup>R</sup>                    | This study |
| IU12059 | D39 $\Delta cps$ $\Delta bgaA::tet$ - $P_{Zn}$ -RBS <sub><i>ftsA</i></sub> <sup>-</sup> $spd_{RS05380}$ (IU1945 transformed with fusion $\Delta bgaA::P_{Zn}$ -RBS <sub><i>ftsA</i></sub> <sup>-</sup> $spd_{RS05380}$ ) | Tet <sup>R</sup>                    | This study |
| K735    | D39 $\Delta cps$ $\Delta phpP::P_c$ -[ $kan-rpsL^+$ ] (IU1945 transformed with fusion $\Delta phpP::P_c$ -[ $kan-rpsL^+$ ] amplicon)                                                                                     | Kan <sup>R</sup>                    | This study |
| K739    | D39 $\Delta cps$ $\Delta [phpP-stkP]::P_c$ -[ $kan-rpsL^+$ ] (IU1945 transformed with fusion $\Delta [phpP-stkP]::P_c$ -[ $kan-rpsL^+$ ] amplicon)                                                                       | Kan <sup>R</sup>                    | This study |

25

26 <sup>a</sup>Strains were constructed as described in *Experimental procedures*. :: indicates an  
27 insertion into a region, whereas <> indicates an exact reading frame replacement.

28 <sup>b</sup>Primers used to synthesize fusion amplicons are listed in Supplemental Tables S2  
29 and S3. All FLAG-tag (FLAG) fusions were made to the carboxyl ends of reading  
30 frames. The amino acid sequence of the FLAG epitope is DYKDDDDK (Hopp *et al.*,  
31 1988, Wayne *et al.*, 2010). FLAG<sup>2</sup> or FLAG<sup>3</sup> indicates two or three tandem sequences of  
32 the FLAG epitope, respectively (Waldo *et al.*, 1999, Wayne *et al.*, 2010). L refers to a  
33 10-amino-acid linker sequence (GSAGSAAGSG). The c-Myc epitope amino acid  
34 sequence is EQKLISEEDL (Evan *et al.*, 1985), and the HA epitope amino acid  
35 sequence is YPYDVPDYA (Tu *et al.*, 1998). See (Land *et al.*, 2013) for additional  
36 details.

37 <sup>c</sup>Antibiotic resistance markers: Erm<sup>R</sup>, erythromycin; Cm<sup>R</sup>, chloramphenicol, Kan<sup>R</sup>,  
38 kanamycin; Spc<sup>R</sup>, spectinomycin; Tet<sup>R</sup>, tetracycline; Str<sup>R</sup>, streptomycin.

39 <sup>d</sup>Details concerning IU9767 construction: The original intergenic region between  
40  $spd_{1481}$  and  $ftsA$  is 218 bp.  $P_c$ -[ $kan-rpsL^+$ ] cassette is inserted after 70 bp of



41 intergenic region. After the P<sub>c</sub>-[*kan-rpsL*<sup>+</sup>] cassette is a duplicated 100 bp sequence (30  
42 bp of *spd\_1481* and 5' intergenic region). This construct is designed so that the P<sub>c</sub>-[*kan-*  
43 *rpsL*<sup>+</sup>] sequence is followed by 30 bp of 3' *spd\_1481* and the entire 218 intergenic  
44 region. The duplicated sequence (30 bp of *spd\_1481* and 5' intergenic region)  
45 terminates transcription of P<sub>c</sub>-[*kan-rpsL*<sup>+</sup>], and maintains the intact intergenic region as  
46 promoter sequence for *ftsA*.

47  
48**TABLE S2.** Oligonucleotide primers used for D39 and R6 strains in this study (order follows Table S1)<sup>a</sup>

| Primer                                                                                         | Sequence (5' to 3')                                               | Template                                             | Amplicon Product                                      |
|------------------------------------------------------------------------------------------------|-------------------------------------------------------------------|------------------------------------------------------|-------------------------------------------------------|
| <b>For construction of E46 (<math>\Delta bgaA::P_c\text{-erm}</math>)</b>                      |                                                                   |                                                      |                                                       |
| P146                                                                                           | TGGCCATTCATCGCTGGTCGTGCTGAAAT                                     | D39                                                  | 5' upstream of <i>bgaA</i> plus 60 bp of <i>bgaA</i>  |
| P148                                                                                           | CATTATCCATTAAAAATCAAACGGATCCTATCCCA<br>CAGCAAACCTTACGAATGCTATAAAC |                                                      |                                                       |
| kanrpsL forward                                                                                | TAGGATCCGTTTGATTTTTAATGGATAATG                                    | <i>P<sub>c</sub>-erm</i> cassette                    | <i>P<sub>c</sub>-erm</i>                              |
| kanrpsL reverse                                                                                | GGGCCCTTTTCTTATGCTTTTG                                            |                                                      |                                                       |
| P149                                                                                           | CAAAGCATAAGGAAAGGGGCCCGCTCTTCTAGG<br>TTTGAGTGCAGGATTAG            | D39                                                  | 57 bp of <i>bgaA</i> + 3' downstream of <i>bgaA</i>   |
| P147                                                                                           | TACGCCTTCTATCATGCCTTTGATCGCCCGT                                   |                                                      |                                                       |
| <b>For construction of E736 (<math>\Delta phpP::P_c\text{-erm}</math>)</b>                     |                                                                   |                                                      |                                                       |
| P1485                                                                                          | CCAAGCCTTGTTGGAGGCGAATAATTCCCT                                    | D39                                                  | 5' upstream of <i>phpP</i> plus 50 bp of <i>phpP</i>  |
| P1486                                                                                          | CATTATCCATTAAAAATCAAACGGATCCTAGACAT<br>AGTCTTGGTTATTTGTTTCGTTTCTG |                                                      |                                                       |
| kanrpsL forward                                                                                | TAGGATCCGTTTGATTTTTAATGGATAATG                                    | <i>P<sub>c</sub>-erm</i> cassette                    | <i>P<sub>c</sub>-erm</i>                              |
| kanrpsL reverse                                                                                | GGGCCCTTTTCTTATGCTTTTG                                            |                                                      |                                                       |
| P1487                                                                                          | CAAAGCATAAGGAAAGGGGCCCGGAGGTTTAG<br>ACAACATTACGTTGC               | D39                                                  | 30 bp of <i>phpP</i> + 3' downstream of <i>phpP</i>   |
| TT547                                                                                          | CGGTGCTTGTGGTTGGTAAGTTTCCTCTGT                                    |                                                      |                                                       |
| <b>For construction of E739 (<math>\Delta [phpP\text{-}stkP]::P_c\text{-erm}</math>)</b>       |                                                                   |                                                      |                                                       |
| P1485                                                                                          | CCAAGCCTTGTTGGAGGCGAATAATTCCC                                     | D39                                                  | 5' upstream of <i>phpP</i> plus 60 bp of <i>phpP</i>  |
| P1486                                                                                          | CATTATCCATTAAAAATCAAACGGATCCTAGACATA<br>GTCTTGGTTATTTGTTTCGTTTCTG |                                                      |                                                       |
| kanrpsL forward                                                                                | TAGGATCCGTTTGATTTTTAATGGATAATG                                    | <i>P<sub>c</sub>-erm</i> cassette                    | <i>P<sub>c</sub>-erm</i>                              |
| kanrpsL reverse                                                                                | GGGCCCTTTTCTTATGCTTTTG                                            |                                                      |                                                       |
| P1497                                                                                          | CAAAGCATAAGGAAAGGGGCCCAATAAGACTAG<br>AGTCAAGATTTCAATCTACAAACCTA   | D39                                                  | 57 bp of <i>stkP</i> and 3' downstream of <i>stkP</i> |
| P1496                                                                                          | CAATACCAAGGCGACAGAAGTTCCTGCCCC                                    |                                                      |                                                       |
| <b>For construction of IU3297 (<math>\Delta divIVA::P_c\text{-}[kan\text{-}rpsL^+]</math>)</b> |                                                                   |                                                      |                                                       |
| LII-R-015                                                                                      | TGGATAAAGAAGGTAGAAGATAGCTATGCTC                                   | D39                                                  | 5' upstream region of <i>divIVA</i>                   |
| SC216                                                                                          | TAACCGTCCAGTTATTATTAAGTAAGTAAGGATCC<br>GTTTGATTTTTAATGGATAATG     |                                                      |                                                       |
| SC215                                                                                          | TAACCGTCCAGTTATTATTAAGTAAGTAAGGATCC<br>GTTTGATTTTTAATGGATAATGTG   | <i>P<sub>c</sub>-[kan-rpsL<sup>+</sup>]</i> cassette | <i>P<sub>c</sub>-[kan-rpsL<sup>+</sup>]</i>           |
| SC218                                                                                          | CTAAACGTCCAAAAGCATAAGGAAAGGGGCCCT<br>CCAGTGCATCCGACAGGTCCAAC      |                                                      |                                                       |
| SC217                                                                                          | GTCCAAAAGCATAAGGAAAGGGGCCCTCCAGTG<br>CATCCGACAGGTCCAACACCAGC      | D39                                                  | 3' downstream region of <i>divIVA</i>                 |

|                                                                                                                |                                                                   |                                                                       |                                                               |
|----------------------------------------------------------------------------------------------------------------|-------------------------------------------------------------------|-----------------------------------------------------------------------|---------------------------------------------------------------|
| LII-F-013                                                                                                      | CACGTTGGACATGCTATGAACAAGATT                                       |                                                                       |                                                               |
| <b>For construction of IU5456 (<i>eZR</i>A-L-FLAG<sup>3</sup>-P<sub>c</sub>-<i>erm</i>)</b>                    |                                                                   |                                                                       |                                                               |
| TT192                                                                                                          | ATCGTGTTCAGCCTTGGTTACGACGCTTT                                     | D39                                                                   | 3' <i>eZR</i> A                                               |
| TT193                                                                                                          | CGGAGCCAGCGGAACCAAAACGAATCGTTTCACG<br>TGTTTTTC                    |                                                                       |                                                               |
| AL351                                                                                                          | CGATTCGTTTTGGTTCCGCTGGCTCCGCTGC                                   | IU5458                                                                | L-FLAG <sup>3</sup> -P <sub>c</sub> - <i>erm</i>              |
| TT194                                                                                                          | ACACAATAAAATCTTTTTCTTTTATTTCTCCCGTTA<br>AATAATAGATAACTATTAATAAAAT |                                                                       |                                                               |
| TT195                                                                                                          | ATAGTTATCTATTATTTAACGGGAGGAAATAAAAGA<br>AAAAGATTTTATTGTGTGAGGAGC  | D39                                                                   | 3' downstream<br>of <i>eZR</i> A                              |
| AL297                                                                                                          | GGACCTACTCCTATTGGAGCCCAAC                                         |                                                                       |                                                               |
| <b>For construction of IU6810 (<i>eZR</i>A-HA-P<sub>c</sub>-<i>kan</i>)</b>                                    |                                                                   |                                                                       |                                                               |
| TT192                                                                                                          | ATCGTGTTCAGCCTTGGTTACGACGCTTT                                     | D39                                                                   | 3' <i>eZR</i> A                                               |
| SV011                                                                                                          | CGGTGATATTCTCATTTTAGCCATGTAATCACTCCT<br>TCTTAATTACAAATTTTTAGCAT   |                                                                       |                                                               |
| SV012                                                                                                          | AAAATTTGTAATTAAGAAGGAGTGATTACATGGCT<br>AAAATGAGAATATCACCGGA       | P <sub>c</sub> -[ <i>kan</i> - <i>rpsL</i> <sup>+</sup> ]<br>cassette | HA-P <sub>c</sub> - <i>kan</i> with<br>HA added via<br>primer |
| SV013                                                                                                          | ACACAATAAAATCTTTTTCTTCTAAAACAATTCATC<br>CAGTAAAATATAATATTTTTATTTT |                                                                       |                                                               |
| SV014                                                                                                          | AATATTATATTTTACTGGATGAATTGTTTTAGAAGA<br>AAAAGATTTTATTGTGTGAGGAGC  | D39                                                                   | 3' downstream<br>of <i>eZR</i> A                              |
| TT330                                                                                                          | GAGGAGTTCGGACTCGACTCTCTCCTTCAAGAA                                 |                                                                       |                                                               |
| <b>For construction of IU7242 (<i>pbp1a</i>-HA-P<sub>c</sub>-<i>kan</i>)</b>                                   |                                                                   |                                                                       |                                                               |
| TT225                                                                                                          | AGCCGTGGAAACTCTAAACAAGGTCGGACT                                    | D39                                                                   | 3' <i>pbp1a</i>                                               |
| TT436                                                                                                          | GCATAATCTGGAACATCATATGGATATGGTTGTGC<br>TGTTGAGGATTCTG             |                                                                       |                                                               |
| TT437                                                                                                          | ATCCTCAACCAGCACAACCATATCCATATGATGTT<br>CCAGATTATGCTTAACC          | IU6810                                                                | HA-P <sub>c</sub> - <i>kan</i>                                |
| TT438                                                                                                          | GAAAAATCTGGATGATAAATGCTAAAACAATTCATC<br>CAGTAAAATATAATATTTTTATTTT |                                                                       |                                                               |
| TT439                                                                                                          | AAATATTATATTTTACTGGATGAATTGTTTTAGCATT<br>TATCATCCAGATTTTTCTGGGTG  | D39                                                                   | 3' downstream<br>of <i>pbp1a</i>                              |
| AL276                                                                                                          | CGCGTGCCAGAGATTGCCAAGATTGAAGCCTTG                                 |                                                                       |                                                               |
| <b>For construction of IU7644 (<i>pbp2b</i>-HA<sup>4</sup>-P<sub>c</sub>-<i>erm</i>)</b>                       |                                                                   |                                                                       |                                                               |
| TT351                                                                                                          | AGTTGACGCCTGATTCTTGGGAACGGTAA                                     | IU7426                                                                | 3' <i>pbp2b</i> -HA <sup>4</sup> -<br>P <sub>c</sub>          |
| TT579                                                                                                          | ACAAATTTTGGGCCCGTTAAGCATAATCTGGAAC<br>ATCATATGGATAAGCATAATCTGGA   |                                                                       |                                                               |
| TT435                                                                                                          | CCATATGATGTTCCAGATTATGCTTAACCGGGCCC<br>AAAATTTGTTTGATTTG          | IU6543                                                                | <i>erm</i> -plus 3'<br>downstream of<br><i>pbp2b</i>          |
| TT352                                                                                                          | TGAAGGACTGGAAAGACCACTGCACCTTCT                                    |                                                                       |                                                               |
| <b>For construction of IU7649 (<i>phpP</i><sup>+</sup>-P<sub>c</sub>-[<i>kan</i>-<i>rpsL</i><sup>+</sup>])</b> |                                                                   |                                                                       |                                                               |
| TT546                                                                                                          | AGAGAGTCATCCCGAGTTCGAGCAGGTAAA                                    | D39                                                                   | 3' <i>phpP</i> + stop                                         |

|                                                                                                                      |                                                               |                                                           |                                                                |
|----------------------------------------------------------------------------------------------------------------------|---------------------------------------------------------------|-----------------------------------------------------------|----------------------------------------------------------------|
| TT580                                                                                                                | CATTATCCATTAAAAATCAAACGGATCCTATCATTCTGCATCCTCCTCGTTCA         |                                                           | codon                                                          |
| kanrpsL forward                                                                                                      | TAGGATCCGTTTGATTTTTAATGGATAATG                                | P <sub>c</sub> -[ <i>kan-rpsL</i> <sup>+</sup> ] cassette | P <sub>c</sub> -[ <i>kan-rpsL</i> <sup>+</sup> ]               |
| kanrpsL reverse                                                                                                      | GGGCCCTTTCTTATGCTTTTG                                         |                                                           |                                                                |
| P1487                                                                                                                | CAAAGCATAAGGAAAGGGGCCCGGAGGTTTAGACAACATTACGGTTGC              | D39                                                       | 60 bp 3' <i>phpP</i> + 5' <i>stkP</i>                          |
| TT547                                                                                                                | CGGTGCTTGTGGTTGGTAAGTTTCCTCTGT                                |                                                           |                                                                |
| <b>For construction of IU7667 (<i>ftsZ</i>-Myc)</b>                                                                  |                                                               |                                                           |                                                                |
| TT165                                                                                                                | AGTGGTGCCGATATGGTCTTCATCACTGCT                                | IU6962                                                    | 3' <i>ftsZ</i> + Myc                                           |
| TT587                                                                                                                | GTATTTTCTTTTACATTCATTTACTTAAAGATCTTCTTCAGAAATAAGTTTTGTTACAG   |                                                           |                                                                |
| TT588                                                                                                                | ACTTATTTCTGAAGAAGATCTTTAAGTAAATGAATGTAAAAGAAAATACAGAACTTGTTT  | D39                                                       | 3' downstream region of <i>ftsZ</i>                            |
| TT166                                                                                                                | TCATTGGGAGAGCCGGTTCCTGTGAAGAAT                                |                                                           |                                                                |
| <b>For construction of IU7797 (<i>pbp2a</i>-HA<sup>4</sup>-P<sub>c</sub>-<i>erm</i>)</b>                             |                                                               |                                                           |                                                                |
| TT335                                                                                                                | CAGGGGGAGTTCGTGGAGTTGTCCGGTC                                  | D39                                                       | 3' fragment of <i>pbp2a</i>                                    |
| SV052                                                                                                                | GCATAATCTGGAACATCATATGGATAGCGAAATAGATTGACTATCGAATCCCA         |                                                           |                                                                |
| SV053                                                                                                                | GATTCGATAGTCAATCTATTTTCGCTATCCATATGATGTTCCAGATTATGCTTATCC     | IU7644                                                    | HA <sup>4</sup> -P <sub>c</sub> - <i>erm</i>                   |
| TT338                                                                                                                | GCTAGGCTTTGACAAGCATCTTATTTCTCCCGTTAAATAATAGATAACTATTA AAAAAT  |                                                           |                                                                |
| TT339                                                                                                                | AGTTATCTATTATTTAACGGGAGGAAATAAGATGCTTGTCAAAGCCTAGCTTTCT       | D39                                                       | 3' downstream region of <i>pbp2a</i>                           |
| P227                                                                                                                 | TCTGTTCCCGTGTGATCCGACAAATCCT                                  |                                                           |                                                                |
| <b>For construction of IU7824 (<math>\Delta</math>[<i>spd_1031-1037</i>]::P<sub>c</sub>-<i>erm</i>)</b>              |                                                               |                                                           |                                                                |
| P396                                                                                                                 | GCATTCCTAGCACCAATTACCCATCCAGAG                                | D39                                                       | 5' upstream of <i>spd_1037</i> + 60 bp of 5' <i>spd_1037</i>   |
| P398                                                                                                                 | CATTATCCATTAAAAATCAAACGGATCCTAACAGACACTTAAAACAAGTG TAGCTACTGA |                                                           |                                                                |
| kanrpsL forward                                                                                                      | TAGGATCCGTTTGATTTTTAATGGATAATG                                | P <sub>c</sub> - <i>erm</i> cassette                      | P <sub>c</sub> - <i>erm</i>                                    |
| kanrpsL reverse                                                                                                      | GGGCCCTTTCTTATGCTTTTG                                         |                                                           |                                                                |
| P1240                                                                                                                | CAAAGCATAAGGAAAGGGGCCCGCCAAGTTTGT TTATGATGGGGATAAAT           | D39                                                       | 60 bp of 3' <i>spd_1031</i> + 3' downstream of <i>spd_1031</i> |
| P1238                                                                                                                | TAACGGCACGACGGTCTGATTCCAAACGAA                                |                                                           |                                                                |
| <b>For construction of IU7921-7922 (<math>\Delta</math><i>stkp</i>::P<sub>c</sub>-[<i>kan-rpsL</i><sup>+</sup>])</b> |                                                               |                                                           |                                                                |
| TT571                                                                                                                | GAGCGAGTGCTTGATGCCTGTGCGGCTCCA                                | D39                                                       | 5' upstream of <i>stkP</i> + 60 bp of 5' <i>stkP</i>           |
| TT654                                                                                                                | CATTATCCATTAAAAATCAAACGGATCCTATCGACCAATCTGTTTGACAATCCG        |                                                           |                                                                |
| kanrpsL                                                                                                              | TAGGATCCGTTTGATTTTTAATGGATAATG                                | K739                                                      | P <sub>c</sub> -[ <i>kan-rpsL</i> <sup>+</sup> ]               |

|                                                                                                                            |                                                                  |                                                              |                                                                                           |
|----------------------------------------------------------------------------------------------------------------------------|------------------------------------------------------------------|--------------------------------------------------------------|-------------------------------------------------------------------------------------------|
| forward                                                                                                                    |                                                                  |                                                              | plus 3' 60 bp of <i>stkP</i> and downstream of <i>stkP</i>                                |
| P1496                                                                                                                      | CAATACCAAGGCGACAGAAGTTCCTGCCCC                                   |                                                              |                                                                                           |
| <b>For construction of IU7923 (<math>\Delta</math><i>stkP</i>::P<sub>c</sub>-<i>erm</i>)</b>                               |                                                                  |                                                              |                                                                                           |
| TT571                                                                                                                      | GAGCGAGTGCTTGATGCCTGTGCGGCTCCA                                   | D39                                                          | 5' upstream of <i>stkP</i> + 60 bp of 5' <i>stkP</i>                                      |
| TT654                                                                                                                      | CATTATCCATTA AAAATCAAACGGATCCTATCGAC<br>CAATCTGTTTGACAATCCG      |                                                              |                                                                                           |
| kanrpsL forward                                                                                                            | TAGGATCCGTTTGATTTTTAATGGATAATG                                   | E739                                                         | P <sub>c</sub> - <i>erm</i> plus 3' 60 bp of <i>stkP</i> and 3' downstream of <i>stkP</i> |
| P1496                                                                                                                      | CAATACCAAGGCGACAGAAGTTCCTGCCCC                                   |                                                              |                                                                                           |
| <b>For construction of IU8271 (<math>\Delta</math>[<i>spd_1029-1037</i>]::P<sub>c</sub>-[<i>kan-rpsL</i><sup>+</sup>])</b> |                                                                  |                                                              |                                                                                           |
| P396                                                                                                                       | GCATTCCTAGCACCAATTACCCATCCAGAG                                   | D39                                                          | 5' upstream of <i>spd_1037</i> + 60 bp of 5' <i>spd_1037</i>                              |
| P398                                                                                                                       | CATTATCCATTA AAAATCAAACGGATCCTAACAGA<br>CACTTAAACAAGTGTAGCTACTGA |                                                              |                                                                                           |
| kanrpsL forward                                                                                                            | TAGGATCCGTTTGATTTTTAATGGATAATG                                   | P <sub>c</sub> -[ <i>kan-rpsL</i> <sup>+</sup> ]<br>cassette | P <sub>c</sub> -[ <i>kan-rpsL</i> <sup>+</sup> ]                                          |
| kanrpsL reverse                                                                                                            | GGGCCCTTTTCTTATGCTTTTG                                           |                                                              |                                                                                           |
| P1512                                                                                                                      | CAAAGCATAAGGAAAGGGGCCCGTTGGCGTTT<br>AACTGTGATTATGAA              | D39                                                          | 60 bp of 3' <i>spd_1029</i> + 3' downstream of <i>spd_1029</i>                            |
| P1510                                                                                                                      | ACCATTGCCACTGCGAACATGGTCTACAGC                                   |                                                              |                                                                                           |
| <b>For construction of IU8496 (<math>\Delta</math><i>divIVA</i>::P<sub>c</sub>-<i>erm</i>)</b>                             |                                                                  |                                                              |                                                                                           |
| TT242                                                                                                                      | GGGAATGGAATGGATAAAGAAGGTAGAAGA                                   | D39                                                          | 5' upstream of <i>divIVA</i>                                                              |
| SC216                                                                                                                      | CATTATCCATTA AAAATCAAACGGATCCTTACTTAC<br>TTAATAATAACTGGACGGTTA   |                                                              |                                                                                           |
| SC215                                                                                                                      | TAACCGTCCAGTTATTATTAAGTAAGTAAGGATCC<br>GTTTGATTTTTAATGGATAATGTG  | P <sub>c</sub> - <i>erm</i><br>cassette                      | P <sub>c</sub> - <i>erm</i>                                                               |
| SC218                                                                                                                      | CTAAACGTCCAAAAGCATAAGGAAAGGGGCCCT<br>CCAGTGCATCCGACAGGTCCAAC     |                                                              |                                                                                           |
| SC217                                                                                                                      | GTCCAAAAGCATAAGGAAAGGGGCCCTCCAGTG<br>CATCCGACAGGTCCAACACCAGC     | D39                                                          | 3' downstream of <i>divIVA</i>                                                            |
| TT238                                                                                                                      | TTCAGCAAGGGCTGACTCAGATGACCATGA                                   |                                                              |                                                                                           |
| <b>For construction of IU9767 (P<sub>c</sub>-[<i>kan-rpsL</i><sup>+</sup>]-<i>ftsA</i><sup>+</sup>)</b>                    |                                                                  |                                                              |                                                                                           |
| TT780                                                                                                                      | CGCATTACCAAGGAGCAAATAGAGCTTCTTTGGCA<br>GG                        | D39                                                          | 3' <i>spd_1481</i> + 70 bp intergenic region                                              |
| TT751                                                                                                                      | ATTATCCATTA AAAATCAAACGGATCCTATCTATTC<br>AGAAATTCTTATTTATAAGCTGC |                                                              |                                                                                           |
| kanrpsL forward                                                                                                            | TAGGATCCGTTTGATTTTTAATGGATAATG                                   | P <sub>c</sub> -[ <i>kan-rpsL</i> <sup>+</sup> ]<br>cassette | P <sub>c</sub> -[ <i>kan-rpsL</i> <sup>+</sup> ]                                          |
| kanrpsL reverse                                                                                                            | GGGCCCTTTTCTTATGCTTTTG                                           |                                                              |                                                                                           |

|                                                                                           |                                                                  |        |                                                                                                                               |
|-------------------------------------------------------------------------------------------|------------------------------------------------------------------|--------|-------------------------------------------------------------------------------------------------------------------------------|
| TT781                                                                                     | CAAAGCATAAGGAAAGGGGCCCGCAGAAAAAAT<br>GATTGCAAAGGAAGC             | D39    | 30 bp 3'<br><i>spd_1481</i> ,<br>intergenic (281<br>bp) and 5' <i>ftsA</i>                                                    |
| TT753                                                                                     | GCCTTCCGCTAATTTGCGAGAGGTTTTCAA                                   |        |                                                                                                                               |
| <b>For construction of IU9913 (<i>divIVA</i>-HA<sup>2</sup>-P<sub>c</sub>-<i>kan</i>)</b> |                                                                  |        |                                                                                                                               |
| SC219                                                                                     | TAACCGTCCAGTTATTATTAAGTAAGTGAGGAATA<br>GAATGCCAATTACATCATTAG     | D39    | 3' <i>divIVA</i>                                                                                                              |
| AJP116                                                                                    | GCATAATCTGGAACATCATATGGATACTTCTGGTT<br>CTTCATACATTGGGCC          |        |                                                                                                                               |
| AJP117                                                                                    | CCCAATGTATGAAGAACCAGAAGTATCCATATGAT<br>GTTCCAGATTATGCTTATC       | IU7426 | HA <sup>2</sup> -P <sub>c</sub> - <i>kan</i>                                                                                  |
| AJP118                                                                                    | TGTCGGATGCACTGGAGCTACTAAAACAATTCATC<br>CAGTAAAATATAATATTTTTATTTT |        |                                                                                                                               |
| AJP119                                                                                    | AATATTATATTTTACTGGATGAATTGTTTTAGTAGC<br>TCCAGTGCATCCGACAGG       | D39    | 3' downstream<br>of <i>divIVA</i>                                                                                             |
| TT238                                                                                     | TTCAGCAAGGGCTGACTCAGATGACCATGA                                   |        |                                                                                                                               |
| <b>For construction of IU9967 (<i>HA</i>-<i>ftsA</i>)</b>                                 |                                                                  |        |                                                                                                                               |
| TT750                                                                                     | GGTCATAGGGGGCAATATCTTGACTAAGAAG                                  | D39    | 5' upstream of<br><i>ftsA</i> +5' <i>ftsA</i><br>with HA<br>sequence<br>added in frame<br>after start<br>codon of <i>ftsA</i> |
| TT765                                                                                     | CTAGCAGCATAATCTGGAACATCATATGGATACAT<br>TACATCGCTTCCTCTCTATCTTCCA |        |                                                                                                                               |
| TT766                                                                                     | TATCCATATGATGTTCCAGATTATGCTGCTAGAGA<br>AGGCTTTTTTACAGGTCTAGATATT | D39    | 3' <i>ftsA</i>                                                                                                                |
| TT753                                                                                     | GCCTTCCGCTAATTTGCGAGAGGTTTTCAA                                   |        |                                                                                                                               |
| <b>For construction of IU11514 (<i>divIVA</i>-Myc-P<sub>c</sub>-<i>kan</i>)</b>           |                                                                  |        |                                                                                                                               |
| SC219                                                                                     | TAACCGTCCAGTTATTATTAAGTAAGTGAGGAATA<br>GAATGCCAATTACATCATTAG     | D39    | 3' <i>divIVA</i>                                                                                                              |
| JC022                                                                                     | TTAAAGATCTTCTTCAGAAATAAGTTTTTGTTCCTT<br>CTGGTTCTTCATACATTGGGCCAA |        |                                                                                                                               |
| JC021                                                                                     | GAACAAAACTTATTTCTGAAGAAGATCTTTAACCG<br>GGCCAAAATTTGTTTGATTTGTA   | IU9913 | Myc-P <sub>c</sub> - <i>kan</i> + 3'<br>downstream<br>region of <i>divIVA</i>                                                 |
| TT238                                                                                     | TTCAGCAAGGGCTGACTCAGATGACCATGA                                   |        |                                                                                                                               |
| <b>For construction of IU11516 (<i>pbp2a</i>-HA<sup>4</sup>-P<sub>c</sub>-<i>kan</i>)</b> |                                                                  |        |                                                                                                                               |
| TT335b                                                                                    | CAGGGGGAGTTCGTGGAGTTGTCCGGTC                                     | IU7797 | 3' <i>pbp2a</i> -HA <sup>4</sup> -<br>P <sub>c</sub>                                                                          |
| SV046                                                                                     | CGGTGATATTCTCATTTTAGCCATGTAATCACTCCT<br>TCTTAATTACAAATTTTTAGCAT  |        |                                                                                                                               |
| SV047                                                                                     | AAAAATTTGTAATTAAGAAGGAGTGATTACATGGC<br>TAAAATGAGAATATCACCGGA     | IU6962 | <i>kan</i>                                                                                                                    |
| AJP218                                                                                    | AAAGCTAGGCTTTGACAAGCATCTTACTAAAACAA<br>TTCATCCAGTAAAATATAATTTTT  |        |                                                                                                                               |
| AJP219                                                                                    | TATTATATTTTACTGGATGAATTGTTTTAGTAAGAT<br>GCTTGTCAAAGCCTAGCTTTCTTG | D39    | 3' downstream<br>of <i>pbp2a</i>                                                                                              |
| P227                                                                                      | TCTGTTCCCGTGTGATCCGACAAATCCT                                     |        |                                                                                                                               |

| <b>For construction of IU12059 (<math>\Delta bgaA::tet\text{-}P_{Zn}\text{-}RBS_{ftsA}\text{-}spd\_RS05380</math>)</b> |                                                                |                                           |                                                                   |
|------------------------------------------------------------------------------------------------------------------------|----------------------------------------------------------------|-------------------------------------------|-------------------------------------------------------------------|
| TT657                                                                                                                  | CGCCCCAAGTTCATCACCAATGACATCAAC                                 | IU9765<br>(Tsui <i>et al.</i> , 2016)     | 5' fragment of $\Delta bgaA::tet\text{-}P_{Zn}\text{-}RBS_{ftsA}$ |
| BR139                                                                                                                  | AAGGGATTTTGCTAATCTCTCCAATACATCGCTTCCTCTCTATCTTCCTTGTTATA       |                                           |                                                                   |
| BR138                                                                                                                  | AGGAAGATAGAGAGGAAGCGATGTATTGGAGAGATTAGCAAATCCCTTGG             | D39<br>genomic                            | <i>spd_RS05380</i>                                                |
| BR141                                                                                                                  | CAACTGGTTTATGAGAAAGTAAGTTCTTTTCATTCTAACAGTCAATCAAAGGAAGAACTT   |                                           |                                                                   |
| BR140                                                                                                                  | CTTCCTTTGATTGACTGTTTAGAATGAAAGAACTTACTTTCTCATAAACCGATTGCTG     | D39<br>genomic                            | 3' fragment of <i>bgaA</i>                                        |
| CS121                                                                                                                  | GCTTTCTTGAGGCAATTCACCTTGGTGC                                   |                                           |                                                                   |
| <b>For construction of <i>phpP</i>(G229D) strains (<i>phpP</i>(G229D))</b>                                             |                                                                |                                           |                                                                   |
| TT546                                                                                                                  | AGAGAGTCATCCCGAGTTCGAGCAGGTA                                   | IU6442                                    | <i>phpP</i> (G229D)                                               |
| TT547                                                                                                                  | CGGTGCTTGTGGTTGGTAAGTTTCCTCTGT                                 |                                           |                                                                   |
| <b>For construction of <i>phpP</i>(D192A) strains (<i>phpP</i>(D192A))</b>                                             |                                                                |                                           |                                                                   |
| TT546                                                                                                                  | AGAGAGTCATCCCGAGTTCGAGCAGGTA                                   | IU7673                                    | 5' fragment containing <i>phpP</i> (D192A)                        |
| BR26                                                                                                                   | CACTGCCTGAAATCATGTTGGTCAAGCCGGCACTATTGAG                       |                                           |                                                                   |
| BR25                                                                                                                   | TTGCTCAATAGTGCCGGCTTGACCAACATGATTTCA                           | IU7673                                    | 3' fragment containing <i>phpP</i> (D192A)- <i>kanrpsL</i>        |
| TT574                                                                                                                  | CGCCTGCTCTGGTGACAAGTAATGAACTGA                                 |                                           |                                                                   |
| TT546                                                                                                                  | AGAGAGTCATCCCGAGTTCGAGCAGGTA                                   | <i>phpP</i> (D192A)                       | To obtain mutation region for initial cross in                    |
| TT580                                                                                                                  | CATTATCCATTAATAAATCAAACGGATCCTATCATTCTGCATCCTCCTCGTTCA         |                                           |                                                                   |
| TT546                                                                                                                  | AGAGAGTCATCCCGAGTTCGAGCAGGTA                                   | <i>phpP</i> (D192A)                       | To obtain full <i>phpP</i> (D192A) for cross ins after sequencing |
| TT547                                                                                                                  | CGGTGCTTGTGGTTGGTAAGTTTCCTCTGT                                 |                                           |                                                                   |
| <b>For construction of K735 (<math>\Delta phpP::P_c\text{-}[kan\text{-}rpsL^+]</math>)</b>                             |                                                                |                                           |                                                                   |
| P1485                                                                                                                  | CCAAGCCTTGTGGAGGCGAATAATCCCT                                   | D39                                       | 5' upstream of <i>phpP</i> plus 5' 60 bp of <i>phpP</i>           |
| P1486                                                                                                                  | CATTATCCATTAATAAATCAAACGGATCCTAGACATAGTCTTGGTTATTTGTTTCGTTTCTG |                                           |                                                                   |
| kanrpsL forward                                                                                                        | TAGGATCCGTTTGATTTTTAATGGATAATG                                 | $P_c\text{-}[kan\text{-}rpsL^+]$ cassette | $P_c\text{-}[kan\text{-}rpsL^+]$                                  |
| kanrpsL reverse                                                                                                        | GGGCCCTTTCTTATGCTTTTG                                          |                                           |                                                                   |
| P1487                                                                                                                  | CAAAGCATAAGGAAAGGGGCCCGGAGGTTTACAACATTACGGTTGC                 | D39                                       | 3' 60 bp of <i>phpP</i> + 3' downstream of <i>phpP</i>            |
| TT547                                                                                                                  | CGGTGCTTGTGGTTGGTAAGTTTCCTCTGT                                 |                                           |                                                                   |
| <b>For construction of K739 (<math>\Delta [phpP\text{-}stkP]::P_c\text{-}[kan\text{-}rpsL^+]</math>)</b>               |                                                                |                                           |                                                                   |

|                 |                                                                   |                                                              |                                                               |
|-----------------|-------------------------------------------------------------------|--------------------------------------------------------------|---------------------------------------------------------------|
| P1485           | CCAAGCCTTGTTGGAGGCGAATAATTCCCT                                    | D39                                                          | 5' upstream of <i>phpP</i> plus 5' 60 bp of <i>phpP</i>       |
| P1486           | CATTATCCATTA AAAATCAAACGGATCCTAGACATA<br>GTCTTGTTATTTGTTTCGTTTCTG |                                                              |                                                               |
| kanrpsL forward | TAGGATCCGTTTGATTTTTAATGGATAATG                                    | P <sub>c</sub> -[ <i>kan-rpsL</i> <sup>+</sup> ]<br>cassette | P <sub>c</sub> -[ <i>kan-rpsL</i> <sup>+</sup> ]              |
| kanrpsL reverse | GGGCCCTTTCCTTATGCTTTTG                                            |                                                              |                                                               |
| P1497           | CAAAGCATAAGGAAAGGGGCCCAATAAGACTAG<br>AGTCAAGATTTCAATCTACAAACCTA   | D39                                                          | 3' 57 bp of <i>stkP</i> + 3' downstream region of <i>stkP</i> |
| P1496           | CAATACCAAGGCGACAGAAGTTCCTGCCCC                                    |                                                              |                                                               |

<sup>a</sup>Genomic DNA of indicated *S. pneumoniae* strains was used as templates for PCR reactions. Strain genotypes are listed in Table S1.



**TABLE S3.** Oligonucleotide primers for Rx1 strains used in this study<sup>a</sup>

| <b>Primer</b>                           |                                                  |                                                                                                                          |
|-----------------------------------------|--------------------------------------------------|--------------------------------------------------------------------------------------------------------------------------|
| <i>ypsB</i> _KOF1_177 <sup>a</sup>      | GGGTGTCTTGGCTTGTGTTTA                            | $\Delta$ <i>gpsB</i> in Rx1                                                                                              |
| <i>ypsB</i> _KOR2_709 <sup>a</sup>      | TCAAACAAATTTTCATCAAGCTTGACC<br>TCACGTCCAAACTCTT  | $\Delta$ <i>gpsB</i> in Rx1                                                                                              |
| <i>ypsB</i> _KOF3_690 <sup>a</sup>      | AAGAGTTTGGACGTGAGGTCAAGCTT<br>GATGAAAATTTGTTTGA  | $\Delta$ <i>gpsB</i> in Rx1                                                                                              |
| <i>ypsB</i> _KOR4_933 <sup>a</sup>      | TCCAATCTATTCAGGCGTTTCTCTAGA<br>ACTAGTGGATCCCCCGG | $\Delta$ <i>gpsB</i> in Rx1                                                                                              |
| <i>ypsB</i> _KOF5_913 <sup>a</sup>      | CCGGGGGATCCACTAGTTCTAGAGAA<br>ACGCCTGAATAGATTGGA | $\Delta$ <i>gpsB</i> in Rx1                                                                                              |
| <i>ypsB</i> _KOR6_158<br>5 <sup>a</sup> | TTGAAAACGAACACGTCCATC                            | $\Delta$ <i>gpsB</i> in Rx1                                                                                              |
| LN235 <sup>a</sup>                      | AGTGTGAGAAAATTTGGT                               | <i>primer forward</i> ,<br>amplification <i>divIVA::erm</i><br>from $\Delta$ <i>divIVA</i> (Fadda <i>et al.</i> , 2003)  |
| LN236 <sup>a</sup>                      | CGCTGGGAATATAAGGAT                               | <i>primer reverse</i> ,<br>amplification <i>divIVA::erm</i><br>from $\Delta$ <i>divIVA</i> (Fadda <i>et al.</i> , 2003)  |
| AM61F <sup>b</sup>                      | GACTGTATCAAGCTAGAACGGTTAAG                       | <i>primer forward</i> , PCR<br>verification of <i>spr1061-</i><br><i>spr1060</i> ( <i>spd_1038-</i><br><i>spd_1037</i> ) |
| AM59R <sup>b</sup>                      | GAGTAATCCTGATGAGAATGATCCAG                       | <i>primer reverse</i> , PCR<br>verification of <i>spr1061-</i><br><i>spr1060</i> ( <i>spd_1038-</i><br><i>spd_1037</i> ) |
| TT575 <sup>b</sup>                      | AATCAGAAAGGGATTGCTTTATGCAGT<br>TCC               | <i>primer forward</i> , PCR<br>verification of <i>spr1057-</i><br><i>spr1056</i> ( <i>spd_1034-</i><br><i>spd_1033</i> ) |
| TT578 <sup>b</sup>                      | CTCCCATACAGCCATTACGATTCATAT<br>TGA               | <i>primer reverse</i> , PCR<br>verification of <i>spr1057-</i><br><i>spr1056</i> ( <i>spd_1034-</i><br><i>spd_1033</i> ) |
| TT635 <sup>b</sup>                      | GCCTTTATGAGGCACCTAAGGGGTAT<br>AGTC               | <i>primer forward</i> , PCR<br>verification of <i>spr1060-</i><br><i>spr1053</i> ( <i>spd_1037-</i><br><i>spd_1030</i> ) |
| P1238 <sup>b</sup>                      | TAACGGCACGACGGTCTGATTCCAAA<br>CGAA               | <i>primer reverse</i> , PCR<br>verification of <i>spr1060-</i><br><i>spr1053</i> ( <i>spd_1037-</i><br><i>spd_1030</i> ) |

|                                                 |                                                 |                                                                                                 |
|-------------------------------------------------|-------------------------------------------------|-------------------------------------------------------------------------------------------------|
| P1481 <sup>o</sup>                              | TTATGTAGGAGGAACCGAGGGCGGA<br>GGAAT              | <i>primer forward</i> , PCR verification of <i>spr1059-spr1056</i> ( <i>spd_1036-spd_1033</i> ) |
| P1482 <sup>o</sup>                              | AGACGAGTGTTCCATAGCCGACTCCT<br>TCATTT            | <i>primer reverse</i> , PCR verification of <i>spr1059-spr1056</i> ( <i>spd_1036-spd_1033</i> ) |
| pKNT25/pUT18_<br><i>gpsB</i> _PF <sup>c</sup>   | A <u>ACTGCAGG</u> ATGGCAAGTATTATTTTT<br>TCAGCG  | <i>primer forward</i> , PCR amplification of <i>gpsB</i> for plasmid insert for B2H studies     |
| pKNT25/pUT18_<br><i>gpsB</i> _BR <sup>c</sup>   | CGGGATCCTCAA <u>AAATCTGAGTTATCTA</u><br>AAATTTG | <i>primer reverse</i> , PCR amplification of <i>gpsB</i> for plasmid insert for B2H studies     |
| pKNT25/pUT18-<br><i>divIVA</i> _PF <sup>c</sup> | A <u>ACTGCAGG</u> ATGCCAATTACATCATTA<br>GAAATA  | <i>primer forward</i> , PCR amplification of <i>divIVA</i> for plasmid insert for B2H studies   |
| pKNT2/pUT18-<br><i>divIVA</i> _BR <sup>c</sup>  | CGGGATCCTTCTGGTTCTTCATACATT<br>GGG              | <i>primer reverse</i> , PCR amplification of <i>divIVA</i> for plasmid insert for B2H studies   |
| pKNT25/pUT18_<br><i>ezrA</i> _PF <sup>c</sup>   | A <u>ACTGCAGG</u> ATGTCTAATGGACAAC              | <i>primer forward</i> , PCR amplification of <i>ezrA</i> for plasmid insert for B2H studies     |
| pKNT25/pUT18_<br><i>ezrA</i> _BR <sup>c</sup>   | CGGGATCCTCAA <u>AACGAATCGTTTCA</u>              | <i>primer reverse</i> , PCR amplification of <i>ezrA</i> for plasmid insert for B2H studies     |
| pKNT25/pUT18_<br><i>ftsZ</i> _PF <sup>c</sup>   | A <u>ACTGCAGG</u> ATGACATTTTCATTTGAT<br>ACAGCTG | <i>primer forward</i> , PCR amplification of <i>ftsZ</i> for plasmid insert for B2H studies     |
| pKNT25/pUT18_<br><i>ftsZ</i> _BR <sup>c</sup>   | CGGGATCCCGATTTTTGAAAAATGGA<br>GGTGTA            | <i>primer reverse</i> , PCR amplification of <i>ftsZ</i> for plasmid insert for B2H studies     |
| pKNT25/pUT18_<br><i>stkP</i> _BF <sup>c</sup>   | CGGGATCCCATGATCCAAATCGGC                        | <i>primer forward</i> , PCR amplification of <i>stkP</i> for plasmid insert for B2H studies     |
| pKNT25/pUT18_<br><i>stkP</i> _ER <sup>c</sup>   | CGGAATTCGAAGGAGTAGCTGAAGTT                      | <i>primer reverse</i> , PCR amplification of <i>stkP</i> for                                    |

|                               |                      |                                                |
|-------------------------------|----------------------|------------------------------------------------|
|                               |                      | plasmid insert for B2H studies                 |
| pKNT25/pUT18_49F <sup>d</sup> | CGCAATTAATGTGAGTTAGC | <i>primer forward, sequencing pKNT25/pUT18</i> |
| pKNT25_328R <sup>d</sup>      | TTGATGCCATCGAGTACG   | <i>primer reverse, sequencing pKNT25</i>       |
| pUT18_304R <sup>d</sup>       | CGAGCGATTTTCCACAACAA | <i>primer reverse, sequencing pUT18</i>        |

54

55

<sup>a</sup>Genomic DNA of the Rx1 *S. pneumoniae* strains was used as templates for PCR reactions. Strain genotypes are listed in Table S1.

56

57

<sup>b</sup>Indicates primers used to verify by PCR the arrangement of *spd\_1033-spd\_1038* chromosomal region of Rx1.

58

59

<sup>c</sup>Indicates primers used to obtain gene sequences for B2H studies.

60

<sup>d</sup>Indicates primers to verify the correct sequence of the genes cloned in the B2H vectors.

61

62

**TABLE S4.** PhpP model similarity to known protein structures.

| Organism                                     | Protein function                  | PDB ID | RMSD <sup>a</sup> | Z-score <sup>b</sup> |
|----------------------------------------------|-----------------------------------|--------|-------------------|----------------------|
| <i>S. agalactiae</i><br>(Stp1)<br>AA 1-242   | Ser/Thr<br>protein<br>phosphatase | 2PK0   | 0.4               | 44.2                 |
| <i>M. tuberculosis</i><br>(Mssp)<br>AA 1-233 | Ser/Thr<br>protein<br>phosphatase | 2V06   | 1.3               | 29.1                 |
| <i>M. tuberculosis</i><br>(PstP)<br>AA 1-240 | Ser/Thr<br>protein<br>phosphatase | 1TXO   | 1.4               | 30.5                 |

63

64 <sup>a</sup>RMSD was determined via PyMOL alignment (AA 1-246 of PhpP) (Schrodinger) of  
65 the PDB modelling file generated from Phyre2 input of PhpP sequence (Kelley *et al.*,  
66 2015). See *Experimental procedures* for details.

67 <sup>b</sup>Z-score was determined via input of the PhpP PDB modeling file generated from  
68 Phyre2 into DALI server (Kelley *et al.*, 2015, Holm & Rosenstrom, 2010).

69 **TABLE S5.** Relative protein phosphorylation levels in mutant strains compared to those  
70 in the Rx1 and R6 parent laboratory strains<sup>a</sup>

| Strain Number | Genotype                                                                               | Sample OD <sub>620</sub> | Relative phosphorylation of StkP/MapZ <sup>b</sup> | Relative phosphorylation of DivIVA |
|---------------|----------------------------------------------------------------------------------------|--------------------------|----------------------------------------------------|------------------------------------|
| IU9256        | Rx1                                                                                    | 0.4                      | ≡1                                                 | ≡1                                 |
| IU9262        | Rx1 $\Delta$ <i>gpsB</i><br><i>phpP(L148S) sup4</i>                                    | 0.4                      | 1.2 ± 0.2                                          | 1.2 ± 0.4                          |
| IU11574       | Rx1 $\Delta$ <i>gpsB</i>                                                               | 0.4                      | 0.2 ± 0.2                                          | 0.3 ± 0.2                          |
| EL59          | R6                                                                                     | 0.4                      | ≡1                                                 | ≡1                                 |
| IU8224        | R6 $\Delta$ <i>gpsB</i>                                                                | 0.4                      | 0.6 ± 0.2                                          | 0.2 ± 0.2                          |
| IU8419        | R6 $\Delta$ [ <i>phpP-stkP</i> ]::P <sub>c</sub> -<br>[ <i>kan-rpsL</i> <sup>+</sup> ] | 0.4                      | 0.1 ± 0.1                                          | 0.1 ± 0.06                         |

71

72 <sup>a</sup>Relative protein phosphorylation levels are listed for mutants compared to the Rx1  
73 and R6 parent laboratory strains grown exponentially to OD<sub>620</sub> ≈ 0.4. Protein  
74 phosphorylation was determined as described in *Experimental procedures*, and a  
75 representative Western blot with the same sample order is shown in Figure 2A, where  
76 StkP~P/MapZ~P corresponds to the double band at ≈ 70 kDa, and DivIVA~P  
77 corresponds to the band around ≈ 45 kDa. The phosphorylation levels are the mean  
78 (±SEM) from at least two independent experiments.

79 <sup>b</sup>The signal level for strains IU9262, IU8224, and IU8419 was low and near the  
80 background level. We do not know why StkP/MapZ phosphorylation was greater in the  
81 R6  $\Delta$ *gpsB* mutant IU8224 than in the Rx1  $\Delta$ *gpsB* mutant IU9262; however, the R6  
82  $\Delta$ *gpsB* mutant grew much better than the Rx1  $\Delta$ *gpsB* mutant, reflective of genetic  
83 differences between these two laboratory strains (see Table 1; *Results*).

84 **TABLE S6.** Depletion of GpsB in the D39 background leads to decrease in  
 85 phosphorylation.<sup>a</sup>

| Strain Number | Genotype                                    | Sample OD <sub>620</sub> | Relative phosphorylation of StkP/MapZ | Relative phosphorylation of DivIVA |
|---------------|---------------------------------------------|--------------------------|---------------------------------------|------------------------------------|
| IU4888        | $\Delta gpsB P_{fcsK} gpsB$<br>+fucose, 1 h | 0.1                      | $0.9 \pm 0.2$                         | $0.7 \pm 0.1$                      |
| IU4888        | $\Delta gpsB P_{fcsK} gpsB$<br>+fucose, 3 h | 0.2-0.4                  | $1.7 \pm 0.2$                         | $1.6 \pm 0.1$                      |
| IU1945        | D39 $\Delta cps$ parent                     | 0.1                      | $\equiv 1$                            | $\equiv 1$                         |
| IU1945        | D39 $\Delta cps$ parent                     | 0.2-0.4                  | $1.5 \pm 0.1$                         | $1.6 \pm 0.1$                      |
| E739          | $\Delta [phpP-stkP]::P_c-erm$               | 0.1                      | 0                                     | 0                                  |
| E739          | $\Delta [phpP-stkP]::P_c-erm$               | 0.2-0.4                  | 0                                     | 0                                  |
| IU4888        | $\Delta gpsB P_{fcsK} gpsB$<br>-fucose, 1 h | 0.1                      | $0.2 \pm 0.1$                         | $0.2 \pm 0.1$                      |
| IU4888        | $\Delta gpsB P_{fcsK} gpsB$<br>-fucose, 2 h | 0.2                      | $0.5 \pm 0.1$                         | $0.4 \pm 0.1$                      |
| IU4888        | $\Delta gpsB P_{fcsK} gpsB$<br>-fucose, 3 h | 0.2-0.3                  | $0.5 \pm 0.2$                         | $0.4 \pm 0.2$                      |

86  
 87 <sup>a</sup>Relative protein phosphorylation levels are listed for merodiploid strains depleted  
 88 for GpsB (-fucose) or not depleted for GpsB (+fucose) for the times indicated compared  
 89 to the exponentially growing IU1945 parent strain. Samples were taken at the OD<sub>620</sub>  
 90 values indicated. Protein phosphorylation was determined as described in *Experimental*  
 91 *procedures*, and a representative Western blot with the same sample order is shown in  
 92 Figure 2B, where StkP~P/MapZ~P corresponds to the double band at  $\approx 70$  kDa, and  
 93 DivIVA~P corresponds to the band around  $\approx 45$  kDa. The relative phosphorylation levels  
 94 are based on means ( $\pm$ SEM) from at least three independent experiments. Signal levels  
 95  $<0.2$  are at the level of background detection of this method and cannot be accurately  
 96 quantitated.

97

**TABLE S7.** Relative protein phosphorylation levels in unencapsulated D39  $\Delta gpsB$ 

98

original and reconstructed suppressor strains<sup>a</sup>

| Strain Number        | Genotype                                                                        | Sample OD <sub>620</sub> | Relative phosphorylation of StkP/MapZ | Relative phosphorylation of for DivIVA |
|----------------------|---------------------------------------------------------------------------------|--------------------------|---------------------------------------|----------------------------------------|
| IU1945               | D39 $\Delta cps$                                                                | 0.4                      | $\equiv 1$                            | $\equiv 1$                             |
| IU5845 <sup>b</sup>  | $\Delta gpsB$ ( <i>sup2</i> )                                                   | 0.4                      | $0.2 \pm 0.02$                        | $0.2 \pm 0.1$                          |
| IU6441 <sup>b</sup>  | $\Delta gpsB$ ( <i>sup3</i> )                                                   | 0.4                      | $0.1 \pm 0.01$                        | $0.1 \pm 0.03$                         |
| IU6442 <sup>b</sup>  | $\Delta gpsB$ ( <i>sup1</i> )<br><i>phpP</i> (G229D)                            | 0.4                      | $1.2 \pm 0.04$                        | $1.2 \pm 0.1$                          |
| E46 <sup>c</sup>     | D39 $\Delta cps$<br>$\Delta bgaA::P_c-erm$                                      | 0.4                      | $0.8 \pm 0.2$                         | $0.8 \pm 0.1$                          |
| IU11221 <sup>d</sup> | D39 $\Delta cps$ $\Delta gpsB$<br><i>phpP</i> (G229D)<br>$\Delta bgaA::P_c-erm$ | 0.4                      | $1.1 \pm 0.3$                         | $1.2 \pm 0.1$                          |
| IU11442 <sup>e</sup> | D39 $\Delta cps$<br>$\Delta phpP::P_c-erm$                                      | 0.4                      | $0.4 \pm 0.1$                         | $1.1 \pm 0.1$                          |
| IU11460 <sup>f</sup> | D39 $\Delta cps$<br>$\Delta stkP::P_c-erm$                                      | 0.4                      | $0.1 \pm 0.02$                        | $0.1 \pm 0.01$                         |
| IU11462 <sup>f</sup> | D39 $\Delta cps$<br>$\Delta [phpP-stkP]::P_c-erm$                               | 0.4                      | $0.04 \pm 0.02$                       | $0.1 \pm 0.03$                         |

99

100

<sup>a</sup>Relative protein phosphorylation levels are listed for mutants compared to the unencapsulated derivative of D39 (IU1945) grown exponentially to OD<sub>620</sub>  $\approx$  0.4. Protein phosphorylation was determined as described in *Experimental procedures*, and a representative Western blot with the same sample order is shown in Figure 3, where StkP~P/MapZ~P corresponds to the double band at  $\approx$  70 kDa, and DivIVA~P corresponds to the band around  $\approx$  45 kDa. Phosphorylation levels are the mean ( $\pm$ SEM) from at least two independent experiments. Signal levels  $<0.2$  are at the level of background detection of this method and cannot be accurately quantitated.

101

102

103

104

105

106

107

108

<sup>b</sup>Originally isolated  $\Delta gpsB$  suppressor strain described in Table 2.

109 <sup>c</sup>Isogenic parent strain for reconstructed  $\Delta gpsB phpP(G229D)$  (*sup1*) strain in Fig. 3.

110 <sup>d</sup>Reconstructed  $\Delta gpsB phpP(G229D)$  (*sup1*) mutant (see Fig. 3 and Fig. 4).

111 <sup>e</sup>The  $\Delta phpP::P_c-erm$  mutation is polar on downstream StkP kinase expression  
112 resulting in decreased phosphorylation of the StkP/MapZ proteins. See text and Fig. 3  
113 for details.

114 <sup>f</sup>Negative control strains lacking the StkP protein kinase.



115

**TABLE S8.** Genes deleted and duplicated in the IU5845 (*sup2*)  $\Delta$ *gpsB* unencapsulated

116

D39 suppressor strain<sup>a</sup>

| Region                                                                                                   | Gene                                              | Putative or defined function                                                             |
|----------------------------------------------------------------------------------------------------------|---------------------------------------------------|------------------------------------------------------------------------------------------|
| Genes in large $\Delta$ [ <i>spd_1026</i> - <i>spd_1037</i> ] deletion                                   | <i>spd_1026</i>                                   | Branched chain alpha-keto acid dehydrogenase subunit E2                                  |
|                                                                                                          | <i>spd_1027</i>                                   | TPP-dependent acetoin dehydrogenase complex, E1 protein subunit beta                     |
|                                                                                                          | <i>spd_1028</i>                                   | Pyruvate dehydrogenase E1 subunit alpha                                                  |
|                                                                                                          | <i>spd_1029</i>                                   | Multidrug resistance protein NorM                                                        |
|                                                                                                          | <i>spd_RS05480</i>                                | Hypothetical protein, no BLAST similarity to proteins of known function                  |
|                                                                                                          | <i>spd_1030</i>                                   | <i>pyrC</i> , dihydroorotase                                                             |
|                                                                                                          | <i>spd_1031</i>                                   | <i>mutX</i> , 8-oxo-dGTP diphosphatase                                                   |
|                                                                                                          | <i>spd_1032</i>                                   | <i>ung</i> , uracil-DNA glycosylase                                                      |
|                                                                                                          | <i>spd_1033</i>                                   | Hypothetical protein, uncharacterized, no BLAST similarity to proteins of known function |
|                                                                                                          | <i>spd_1034</i>                                   | Non-canonical pyrimidine nucleotidase, HAD-like superfamily domain (YjjG)                |
|                                                                                                          | <i>spd_1035</i>                                   | Hypothetical protein, BLAST to phosphate dependent mannose transporter                   |
|                                                                                                          | <i>spd_1036</i>                                   | PTS fructose transporter subunit IIA                                                     |
|                                                                                                          | <i>spd_1037</i>                                   | Hypothetical protein, BLAST to histidine triad protein                                   |
| Selected genes in large 134 gene duplication $\Omega$ [ <i>spd_0889</i> - <i>spd_1026</i> ] <sup>b</sup> | <i>spd_0888</i>                                   | Adhesion protein, BLAST to AdcA                                                          |
|                                                                                                          | <i>spd_0889</i>                                   | Hypothetical protein, BLAST to histidine triad proteins, HIT family hydrolases           |
|                                                                                                          | <i>spd_0904</i>                                   | Thymidine kinase, predicted                                                              |
|                                                                                                          | <i>spd_0925</i>                                   | Hydrolase, predicted, BLAST to ADP-ribosylglycohydrolase                                 |
|                                                                                                          | <i>spd_0926</i>                                   | Lipid kinase, predicted                                                                  |
|                                                                                                          | <i>spd_0939</i>                                   | MutR family transcriptional regulator, predicted                                         |
|                                                                                                          | <i>spd_0952</i>                                   | FtsW                                                                                     |
|                                                                                                          | <i>spd_0953</i>                                   | Phosphoenolpyruvate carboxylase                                                          |
|                                                                                                          | <i>spd_0958</i>                                   | RNA polymerase sigma factor SigA                                                         |
|                                                                                                          | <i>spd_0973</i>                                   | ATP-dependent DNA helicase PcrA                                                          |
|                                                                                                          | <i>spd_0981</i>                                   | Adenylate cyclase, predicted                                                             |
|                                                                                                          | <i>spd_0982</i>                                   | GTP pyrophosphokinase, predicted                                                         |
|                                                                                                          | <i>spd_0983</i>                                   | NAD(+) kinase, predicted                                                                 |
| <i>spd_0985</i>                                                                                          | <i>eutD</i> , phosphate acetyltransferase         |                                                                                          |
| <i>spd_0999</i>                                                                                          | MutR family transcriptional regulator, predicted  |                                                                                          |
| <i>spd_1001</i>                                                                                          | <i>ligA</i> , DNA ligase (NAD <sup>+</sup> ) LigA |                                                                                          |

|  |                                                    |                                      |
|--|----------------------------------------------------|--------------------------------------|
|  | <i>spd_RS05380</i><br>(before<br><i>spd_1011</i> ) | Phosphoserine phosphatase, predicted |
|  | <i>spd_1018</i>                                    | Immunoglobulin A1 protease           |

117

118

119

120

121

122

<sup>a</sup>See Table 2 for suppressor isolation and Figure S3 for a depiction of the  $\Delta[spd\_1026\text{-}spd\_1037]$   $\Omega[spd\_0889\text{-}spd\_1026]$  in the *spd\_1034* region of the pneumococcal chromosome of strain IU5845. The deletion and insertion in the IU6441 (*sup3*) suppressor strain overlap and are slightly smaller than those listed above (see Fig. S3B).

123

124

125

126

<sup>b</sup>Genes were selected based on functions important for cell division, normal growth, pneumococcal pathogenesis, or putative roles in protein phosphorylation. The mechanisms, if any, by which the duplications contribute to  $\Delta gpsB$  suppression and the steps that lead to formation of the deletions/insertions are unknown.

## SUPPLEMENTAL FIGURE LEGENDS

**Fig. S1.**  $\Delta divIVA$  mutations are not epistatic to  $\Delta gpsB$  in pneumococcal strain Rx1.

A) Representative growth curve of Rx1 strains. Strains are listed, 1-4 as follows: 1, Rx1 (IU9256); 2, Rx1  $\Delta gpsB$  *phpP*(L148S) (IU9262); 3, Rx1  $\Delta divIVA$  (IU9264); 4, R6  $\Delta gpsB$  *phpP*(L148S)  $\Delta divIVA$  (IU9266). Doubling times were calculated using a nonlinear regression exponential growth curve program (GraphPad Prism) for  $OD_{620} \approx 0.015$  to 0.25. B) FDAA staining and microscopy of Rx1 live cells were performed as described in *Experimental procedures*. The panels from left to right are: phase, FDAA labeling, and phase/FDAA overlay. Representative images are shown of  $\geq 95\%$  of the cells ( $n > 50$ ) examined manually of each strain. The experiments were performed two to three times independently with similar results. Reduced autolysis of the R6  $\Delta gpsB$  *phpP*(L148S)  $\Delta divIVA$  (IU9266) mutant in stationary phase was observed in each experiment.

**Fig. S2.** A) Diagram of the chromosomal *phpP-stkP* operon with surrounding genes. The positions of mutations that lead to the G117D, L148S, T163P, D192A, and G229D amino acid changes in PhpP are indicated, together with the location of the *stkP*(G10 STOP) mutation in one of the constructed *phpP*(G229D) mutants. B) Diagram showing the intermediate *phpP*<sup>+</sup>-[P<sub>c</sub>-*kanrpsL*<sup>+</sup>]-*stkP*<sup>+</sup> strain used to construct *phpP*(G229D) or *phpP*(D192A) mutants in the *rpsL1* background. Primers TT546 and TT547 were used to amplify *phpP*<sup>+</sup>-[P<sub>c</sub>-*kanrpsL*<sup>+</sup>]-*stkP*<sup>+</sup>, *phpP*(G229D), or *phpP*(D192A) for transformations.

**Fig. S3.** A) Diagram of the chromosomal locus indicating the deletion/duplication mutations found in the D39  $\Delta cps$   $\Delta gpsB$  *sup2* (IU5845) and *sup3* (IU6441) suppressor strains (Table 2, lines 2 and 3). IU5845 has a deletion of  $\Delta spd$ \_[1026-1037] and a

150 duplication of  $\Omega spd\_ [0889-1026]$  (indicated in figure), while IU6441 has a deletion of  
151  $\Delta spd\_ [1029-1037]$  and a duplication of  $\Omega spd\_ [0889-1024]$  (see B, below). See Table S8  
152 for a list of deleted genes and selected duplicated genes in the *sup2* and *sup3*  $\Delta gpsB$   
153 suppressor strains. In addition, mutations are indicated in this region that are present in  
154 laboratory strain Rx1 or R6 parent compared to the D39  $\Delta cps$  progenitor strain. The  
155 deletions at the bottom were constructed in the D39  $\Delta cps$  strain and tested for their  
156 effects on protein phosphorylation (Fig. S8). B) MiSeq DNA read distribution showing  
157 chromosomal duplications and deletions in the *spd\_1034* region of the genomes of  
158  $\Delta gpsB sup3$  (IU6441) and  $\Delta gpsB sup2$  (IU5845) that are not present in  $\Delta gpsB sup1$   
159 (IU6442) (see Table 2, rows 1-3).

160 **Fig. S4.** Structure and specific activity of wild-type and mutant *Spn* PhpP proteins.  
161 A) Threaded structure of the pneumococcal PhpP protein phosphatase showing amino  
162 acids in the active site region changed in  $\Delta gpsB$  suppressor mutants (see Table 2).  
163 Phyre2 modeling of *Spn* PhpP structure (blue) is overlaid with the *S. agalactiae* Stp1  
164 structure (green), PDB ID: 2PK0. Alignment was performed using PyMOL (Schrödinger,  
165 LLC). Inset shows a close up of the aligned structure where the *Spn* active site arginine  
166 (R13), and amino acid changes found in  $\Delta gpsB$  suppressor mutants are indicated as  
167 pink sticks at residues G117, L148, T163, G229, R13 (active site arginine) (Rantanen *et*  
168 *al.*, 2007), and D192 (aspartate residue important for binding  $Mn^{2+}$  ions required for  
169 PhpP activity) (Nováková *et al.*, 2005). B) Phosphatase specific activities of purified  
170 PhpP(G229D) and PhpP(L148S) are greatly reduced (>16-fold) compared to wild-type  
171 PhpP<sup>+</sup>. Phosphatase activity was quantified as pmol of free phosphate released in a  
172 defined time from phosphorylated peptide RRA(pT)VA by purified His-tagged PhpP

173 protein as described previously (Nováková *et al.*, 2005). The PhpP(G229D) and  
174 PhpP(L148S) amino acid changes were introduced into expression plasmid pEXPhpP<sup>+</sup>  
175 by using the QuickChange mutagenesis kit (Stratagene) and the following primers:  
176 PhpP\_G229D\_F GTTTTGCTAACAAATGCAGGAGATTTAGACAACATTACGGTTGC;  
177 PhpP\_G229D\_RGCAACCGTAATGTTGTCTAAATCTCCTGCATTGTTAGCAAAAC;  
178 PhpP\_G229D\_RGCAACCGTAATGTTGTCTAAATCTCCTGCATTGTTAGCAAAAC; and  
179 PhpP\_G229D\_R GCAACCGTAATGTTGTCTAAATCTCCTGCATTGTTAGCAAAAC.

180 Mutations in expression plasmids were confirmed by DNA sequencing. Phosphate-  
181 release assays using the malachite green phosphate-release kit (POMG-25H; BioAssay  
182 Systems, Hayward, CA) were performed twice independently for each purified protein.  
183 Data shown are mean ± SEM.

184 **Fig. S5.** Changes in PhpP suppressors are at conserved amino acids. Degree of  
185 conservation of each residue in *Spn* PhpP and *S. agalactiae* PP2C phosphatase is  
186 shown, as indicated by the legend in the bottom right corner. Asterisks mark essential  
187 Mn<sup>2+</sup> coordinating and catalytic residues D192 and R13 (Nováková *et al.*, 2005,  
188 Rantanen *et al.*, 2007), and residues found to be mutated in  $\Delta$ *gpsB* suppressor strains:  
189 G117, R125, L148, T163, and G229. Degree of conservation is indicated by color coded  
190 boxes, which was determined by the ConSurf server (Ashkenazy *et al.*, 2016) using a  
191 multisequence alignment of the amino acid sequences from the *S. agalactiae* PP2C  
192 phosphatase, *S. pneumoniae* PhpP, and homologs *L. monocytogenes* Stp, *B. subtilis*  
193 PrpC, *P. aeruginosa* Stp1, and *S. mutans* Pppl.

194 **Fig. S6** Western blot demonstrating that PhpP(D192A) and PhpP(G229D) amino  
195 acid changes do not significantly affect StkP and PhpP amounts in reconstructed

196 suppressor strains. Strains were harvested at  $OD_{620} \approx 0.4$ . A) Immunoblotting was  
197 performed with  $\alpha$ -PhpP antibody for the following strains: lane 1, wild-type parent D39  
198  $\Delta cps rpsL1$  (IU1824); and lane 2, D39  $\Delta cps rpsL1 \Delta gpsB phpP(D192A)$  (IU11348). B)  
199 Immunoblotting of the same blot was performed with  $\alpha$ -StkP antibody. C)  
200 Immunoblotting was performed with  $\alpha$ -PhpP antibody for the following strains: lane 1,  
201 wild-type parent D39  $\Delta cps$  (IU1945); and lane 2, D39  $\Delta cps \Delta gpsB \Delta bgaA::P_c-erm$   
202  $phpP(G229D)$  (IU11221). D) Immunoblotting of the same blot was performed with  $\alpha$ -  
203 StkP antibody. These experiments were performed twice independently with similar  
204 results.

205 **Fig. S7.** Western blot demonstrating that the PhpP(G229D) amino acid change does  
206 not affect PhpP or StkP amounts in the originally isolated  $\Delta gpsB sup1$  strain (Table 2,  
207 line 1). Strains were harvested at  $OD_{620} \approx 0.4$ . A) Immunoblotting was performed with  $\alpha$ -  
208 PhpP antibody on the following strains: lane 1, wild-type parent D39  $\Delta cps$  (IU1945);  
209 lane 2, D39  $\Delta cps \Delta gpsB phpP(G229D)$  (IU6442, *sup1*); lane 3, D39  $\Delta cps rpsL1$   
210  $phpP(G229D) stkP$  (G10 *STOP*) (IU7685); lane 4, D39  $\Delta cps \Delta [phpP-stkP]$  (K739)  
211 control; lane 5, D39  $\Delta cps \Delta stkP$  (IU7921); and lane 6, D39  $\Delta cps \Delta phpP$  (K735) control.  
212 B) Immunoblotting of the same blot was performed with  $\alpha$ -StkP antibody. These  
213 experiments were performed three times independently with similar results. The red line  
214 marks a colored 53 kDa standard that did not transfer.

215 **Fig. S8.** Deletion of *spd\_[1029-1037]* does not affect threonine phosphorylation of  
216 proteins. Western blotting using  $\alpha$ -pThr antibody was used to detect proteins  
217 phosphorylated at Thr residues in strains containing either the *spd\_[1029-1037]* or  
218 *spd\_[1031-1037]* deletion harvested at  $OD_{620} \approx 0.1$  and 0.4. Lanes 1 and 5, wild-type

219 parent D39  $\Delta cps$  (IU1945); lanes 2 and 6, D39  $\Delta cps \Delta[spd\_1031-1037]::P_c-erm$   
220 (IU7824); lanes 3 and 7, D39  $\Delta cps \Delta[spd\_1029-1037]::P_c-[kan-rpsL^+]$  (IU8271); and  
221 lanes 4 and 8, D39  $\Delta cps \Delta[phpP-stkP]$  (E739) control. This experiment was performed  
222 three times with similar results. More protein phosphorylation was routinely detected in  
223 cells at higher density (0.4) than at lower density (0.1). The red line marks a colored 53  
224 kDa standard that did not transfer.

225 **Fig. S9.** GpsB is not required for localization of StkP in rings in laboratory strain Rx1.  
226 Fluorescence microscopy was performed on the Rx1 parent and Rx1  $\Delta gpsB$   
227  $phpP(L148S)$  derivative strains expressing  $P_{Zn-gfp-stkP}^+$ . Cells were inoculated 1:100  
228 from frozen glycerol starters ( $OD_{620} \approx 0.3$ ) in pre-warmed BHI broth and incubated at  
229 37°C until they reached  $OD_{620}=0.1$ . At this time, cultures were split into two tubes  
230 containing no added zinc or 0.65 mM  $ZnCl_2$  and incubated at 37°C. Growth was  
231 monitored turbidimetrically every 30 min and samples for microscopy were taken. A)  
232 Rx1 parent strain expressing GFP-StkP ectopically; and B) Rx1  $\Delta gpsB phpP(L148S)$   
233 expressing GFP-StkP ectopically, taken after two hours after induction. Percentage of  
234 cells with StkP rings is based on 142 manually examined cells of the  $\Delta gpsB$   
235  $phpP(L148S)$  mutant.

236 **Fig. S10.** Pairwise co-IP of GpsB-L-FLAG<sup>3</sup> with bPBP2b-HA, StkP-HA, or aPBP2a-  
237 HA<sup>4</sup>, but not with bPBP2x-HA. Co-IP experiments were performed as described in  
238 *Experimental procedures*. A) Western blots of cell lysates before co-IP was performed.  
239 Total protein loaded for each sample was 62  $\mu g$ . The top blot was probed with anti-HA  
240 primary antibody, and the bottom blot was probed with anti-FLAG primary antibody.  
241 Predicted molecular weights (MWs) of bPBP2x-HA, bPBP2b-HA, StkP-HA, and

242 aPBP2a-HA<sup>4</sup> are 83.5 kDa, 75.7 kDa, 73.5 kDa, and 85.2 kDa, respectively. The  
243 predicted MW of GpsB-L-FLAG<sup>3</sup> monomer is 16.4 kDa. B) Western blot after co-IP was  
244 performed. Total amount of elution loaded was 20  $\mu$ L after mixing 1:1 with 2X Laemmli  
245 sample buffer. The top blot was probed with anti-HA primary antibody for detection of  
246 HA tagged prey proteins, using GpsB-L-FLAG<sup>3</sup> as bait. Predicted MWs of proteins are  
247 listed in A. The bottom blot was probed with anti-FLAG primary antibody for detection of  
248 GpsB-L-FLAG<sup>3</sup>. Two major bands can be detected by anti-FLAG primary antibody in the  
249 strains expressing GpsB-L-FLAG<sup>3</sup>; the bottom band is the monomer and the upper band  
250 may be a trimer. Strains used to prepare extracts were constructed in D39  $\Delta$ *cps* strain  
251 IU1945. Lane 1 *pbp2x*-HA *gpsB*<sup>+</sup> (IU6929); lane 2 *gpsB*-L-FLAG<sup>3</sup> *pbp2x*-HA (IU11314);  
252 lane 3 *pbp2b*-HA *gpsB*<sup>+</sup> (IU6933); lane 4 *gpsB*-L-FLAG<sup>3</sup> *pbp2b*-HA (IU11316); lane 5  
253 *stkP*-HA *gpsB*<sup>+</sup> (IU7438); lane 6 *gpsB*-L-FLAG<sup>3</sup> *stkP*-HA (IU11412); lane 7 *pbp2a*-HA<sup>4</sup>  
254 *gpsB*<sup>+</sup> (IU11560); and lane 8 *pbp2a*-HA<sup>4</sup> *gpsB*-L-FLAG<sup>3</sup> (IU11516).

255 **Fig. S11.** Pairwise co-IP of GpsB-L-FLAG<sup>3</sup> with EzrA-HA, but not with HA-FtsA or  
256 aPBP1a-HA. Co-IP experiments were performed as described in *Experimental*  
257 *procedures*. A) Western blots of cell lysates before co-IP was performed. Total protein  
258 loaded for each sample was 57  $\mu$ g. The top blot was probed with anti-HA primary  
259 antibody, and the bottom blot was probed with anti-FLAG primary antibody. Predicted  
260 molecular weights (MWs) of EzrA-HA, HA-FtsA, and aPBP1a-HA are 67.6 kDa, 50.7  
261 kDa, and 81.0 kDa, respectively. The predicted MW of GpsB-L-FLAG<sup>3</sup> monomer is 16.4  
262 kDa. B) Western blot after co-IP was performed. Total amount of elution loaded was 20  
263  $\mu$ L after mixing 1:1 with 2X Laemmli sample buffer. The top blot shown was probed with  
264 anti-HA primary antibody for detection of HA tagged prey proteins, using GpsB-L-FLAG<sup>3</sup>



265 as bait. Predicted MWs of proteins are listed in A. The bottom blot was probed with anti-  
266 FLAG primary antibody for GpsB-L-FLAG<sup>3</sup>. Two major bands can be detected by anti-  
267 FLAG primary antibody in the strains expressing GpsB-L-FLAG<sup>3</sup>; the bottom band is the  
268 monomer and the upper band may be a trimer. Strains used to prepare extracts were  
269 constructed in D39  $\Delta cps$  strain IU1945. Lane 1, *ezrA*-HA *ftsZ*-Myc *gpsB*<sup>+</sup> (IU9713); lane  
270 2, *gpsB*-L-FLAG<sup>3</sup> *ezrA*-HA *ftsZ*-Myc (IU11428); lane 3, HA-*ftsA* *ftsZ*-Myc *gpsB*<sup>+</sup>  
271 (IU10302); lane 4, *gpsB*-L-FLAG<sup>3</sup> HA-*ftsA* *ftsZ*-Myc (IU11432); lane 5, *pbp1a*-HA *gpsB*<sup>+</sup>  
272 (IU7242); and lane 6 *gpsB*-L-FLAG<sup>3</sup> *pbp1a*-HA (IU11566).

273 **Fig. S12.** Pairwise co-IP of EzrA-L-FLAG<sup>3</sup> with FtsZ-Myc, but lack of pairwise co-IP  
274 of GpsB-L-FLAG<sup>3</sup> with DivIVA-Myc or FtsZ-Myc. Co-IP experiments were performed as  
275 described in *Experimental procedures*. A) Western blots of cell lysates before co-IP was  
276 performed. Total protein loaded for each sample was 69  $\mu$ g. The top blot was probed  
277 with anti-Myc primary antibody, and the bottom blot was probed with anti-FLAG primary  
278 antibody. Predicted molecular weights (MWs) of DivIVA-Myc and FtsZ-Myc are 31.5  
279 kDa and 45.7 kDa, respectively. DivIVA was previously shown to run at a higher MW  
280 than predicted (45 kDa) (Fadda *et al.*, 2007). The predicted MWs of GpsB-L-FLAG<sup>3</sup> and  
281 EzrA-L-FLAG<sup>3</sup> are 16.4 kDa and 70.3 kDa, respectively. B) Western blot after co-IP was  
282 performed. Total amount of elution loaded was 20  $\mu$ L after mixing 1:1 with 2X Laemmli  
283 sample buffer. The top blot was probed with anti-Myc primary antibody for detection of  
284 Myc tagged prey proteins, using GpsB-L-FLAG<sup>3</sup> or EzrA-L-FLAG<sup>3</sup> as bait. Predicted  
285 MWs of proteins are listed in A. The bottom blot was probed with anti-FLAG primary  
286 antibody for GpsB-L-FLAG<sup>3</sup> or EzrA-L-FLAG<sup>3</sup>. Strains used to prepare extracts were  
287 constructed in D39  $\Delta cps$  strain IU1945. Lane 1, *divIVA*-Myc *gpsB*<sup>+</sup> (IU11558); lane 2

288 *gpsB*-L-FLAG<sup>3</sup> *divIVA*-Myc (IU11514); lane 3, HA-*ftsA ftsZ*-Myc *gpsB*<sup>+</sup> (IU10302); lane  
289 4, *gpsB*-L-FLAG<sup>3</sup> HA-*ftsA ftsZ*-Myc (IU11432); lane 5, HA-*ftsA ftsZ*-Myc *eZR*A<sup>+</sup>  
290 (IU10302); lane, 6 HA-*ftsA ftsZ*-Myc *eZR*A-L-FLAG<sup>3</sup> (IU11340).

291 **Fig. S13.** Pairwise co-IP of StkP-FLAG<sup>2</sup> with bPBP2x-HA and bPBP2b-HA. Co-IP  
292 experiments were performed as described in *Experimental procedures*. A) Western  
293 blots of cell lysates before co-IP was performed. Total protein loaded for each sample  
294 was 52 µg. The top blot was probed with anti-HA primary antibody, and the bottom blot  
295 was probed with anti-FLAG primary antibody. Predicted molecular weights (MWs) of  
296 bPBP2x-HA and bPBP2b-HA are 83.5 kDa and 75.7 kDa, respectively. Predicted MW of  
297 StkP-FLAG<sup>2</sup> is 74.3 kDa. B) Western blot after co-IP was performed. Total amount of  
298 elution loaded was 20 µL after mixing 1:1 with 2X Laemmli sample buffer. The top blot  
299 was probed with anti-HA primary antibody for detection of HA tagged prey proteins,  
300 using StkP-FLAG<sup>2</sup> as bait. Predicted MWs of proteins are listed in A. The bottom blot  
301 was probed with anti-FLAG primary antibody for detection of StkP-FLAG<sup>2</sup>. Strains used  
302 to prepare extracts were constructed in D39  $\Delta$ *cps* strain IU1945. Lane 1, *pbp2x*-HA  
303 *stkP*<sup>+</sup> (IU6929); lane, 2 *stkP*-FLAG<sup>2</sup> *pbp2x*-HA (IU7510); lane 3, *pbp2b*-HA *stkP*<sup>+</sup>  
304 (IU6933); and lane 4, *stkP*-FLAG<sup>2</sup> *pbp2b*-HA (IU7512).

305 **Fig. S14.** Pairwise co-IP of GpsB-L-FLAG<sup>3</sup> with StkP and MreC, but not with  
306 detectable levels of FtsZ, FtsA or PhpP, and pairwise co-IP of StkP-FLAG<sup>2</sup> with MreC,  
307 but not with FtsZ, FtsA, or PhpP. Co-IP experiments were performed as described in  
308 *Experimental procedures*. A) Western blots of cell lysates before co-IP was performed.  
309 Total protein loaded for each sample was 56 µg. The blots shown were probed with  
310 native antibodies towards the prey protein of interest or commercial anti-FLAG, as

311 indicated. Predicted molecular weight (MWs) of FtsZ, FtsA, PhpP, StkP, GpsB-L-FLAG<sup>3</sup>,  
312 and StkP-FLAG<sup>2</sup> are 44.5, 49.6, 27.1, 72.3, 16.4, and 74.3 kDa, respectively. B)  
313 Western blot after co-IP was performed. Total amount of elution loaded was 20 µL after  
314 mixing 1:1 with 2X Laemmli sample buffer. Predicted MWs of proteins are listed in A.  
315 Strains used to prepare extracts were constructed in D39  $\Delta cps$  strain IU1945. Lane 1,  
316 D39  $\Delta cps$  (IU1945); lane 2, *gpsB*-L-FLAG<sup>3</sup> (IU5458); and lane 3, *stkP*-FLAG<sup>2</sup> (IU7434).

317 **Fig. S15.** Interactions between *Spn* GpsB and other division proteins detected by  
318 B2H assays. Hybrid plasmid pairs were co-transformed into the *E. coli* strain BTH101,  
319 and interactions were detected by spotting the co-transformation mixtures onto LB-X-gal  
320 agar plates, supplemented with the appropriate concentrations of ampicillin and  
321 kanamycin and photographed after 40 hours, as described in *Experimental procedures*.  
322 A) GpsB-T25, DivIVA-T25, EzrA-T25 and FtsZ-T25 fusions co-expressed with DivIVA-  
323 T18, GpsB-T18, EzrA-T18, and FtsZ-T18 fusions, respectively. B) StkP-T25 and StkP-  
324 T18 fusions co-expressed with StkP, GpsB, and DivIVA -T18 or -T25, respectively. The  
325 bottom panels show the negative (-) and positive (+) controls for the B2H system. White  
326 indicates no interactions; blue indicates interactions. See text for additional details.

## 327

## 328 REFERENCES FOR SUPPLEMENTAL INFORMATION

- 329 Ashkenazy, H., S. Abadi, E. Martz, O. Chay, I. Mayrose, T. Pupko & N. Ben-Tal, (2016)  
330 ConSurf 2016: an improved methodology to estimate and visualize evolutionary  
331 conservation in macromolecules. *Nuc Acids Res* **44**: W344-350.
- 332 Evan, G.I., G.K. Lewis, G. Ramsay & J.M. Bishop, (1985) Isolation of monoclonal  
333 antibodies specific for human c-myc proto-oncogene product. *Molec Cell Biol* **5**:  
334 3610-3616.
- 335 Fadda, D., C. Pischedda, F. Caldara, M.B. Whalen, D. Anderluzzi, E. Domenici & O.  
336 Massidda, (2003) Characterization of *divIVA* and other genes located in the  
337 chromosomal region downstream of the *dcw* cluster in *Streptococcus*  
338 *pneumoniae*. *J Bacteriol* **185**: 6209-6214.

- 339 Fadda, D., A. Santona, V. D'Ulisse, P. Ghelardini, M.G. Ennas, M.B. Whalen & O.  
340 Massidda, (2007) *Streptococcus pneumoniae* DivIVA: localization and  
341 interactions in a MinCD-free context. *J Bacteriol* **189**: 1288-1298.
- 342 Holm, L. & P. Rosenstrom, (2010) Dali server: conservation mapping in 3D. *Nuc Acids*  
343 *Res* **38**: W545-549.
- 344 Hopp, T.P., K.S. Prickett, V.L. Price, R.T. Libby, C.J. March, D.P. Cerretti, D.L. Urdal &  
345 P.J. Conlon, (1988) A short polypeptide marker sequence useful for recombinant  
346 protein identification and purification. *Bio-Technol* **6**: 1204-1210.
- 347 Hoskins, J., W.E. Alborn, Jr., J. Arnold, L.C. Blaszczak, S. Burgett, B.S. DeHoff, S.T.  
348 Estrem, L. Fritz, D.J. Fu, W. Fuller, C. Geringer, R. Gilmour, J.S. Glass, H. Khoja,  
349 A.R. Kraft, R.E. Lagace, D.J. LeBlanc, L.N. Lee, E.J. Lefkowitz, J. Lu, P.  
350 Matsushima, S.M. McAhren, M. McHenney, K. McLeaster, C.W. Mundy, T.I.  
351 Nicas, F.H. Norris, M. O'Gara, R.B. Peery, G.T. Robertson, P. Rockey, P.M. Sun,  
352 M.E. Winkler, Y. Yang, M. Young-Bellido, G. Zhao, C.A. Zook, R.H. Baltz, S.R.  
353 Jaskunas, P.R. Rosteck, Jr., P.L. Skatrud & J.I. Glass, (2001) Genome of the  
354 bacterium *Streptococcus pneumoniae* strain R6. *J Bacteriol* **183**: 5709-5717.
- 355 Kelley, L.A., S. Mezulis, C.M. Yates, M.N. Wass & M.J. Sternberg, (2015) The Phyre2  
356 web portal for protein modeling, prediction and analysis. *Nat Protocols* **10**: 845-  
357 858.
- 358 Land, A.D., H.C. Tsui, O. Kocaoglu, S.A. Vella, S.L. Shaw, S.K. Keen, L.T. Sham, E.E.  
359 Carlson & M.E. Winkler, (2013) Requirement of essential Pbp2x and GpsB for  
360 septal ring closure in *Streptococcus pneumoniae* D39. *Molec Microbiol* **90**: 939-  
361 955.
- 362 Lanie, J.A., W.L. Ng, K.M. Kazmierczak, T.M. Andrzejewski, T.M. Davidsen, K.J.  
363 Wayne, H. Tettelin, J.I. Glass & M.E. Winkler, (2007) Genome sequence of  
364 Avery's virulent serotype 2 strain D39 of *Streptococcus pneumoniae* and  
365 comparison with that of unencapsulated laboratory strain R6. *J Bacteriol* **189**: 38-  
366 51.
- 367 Nováková, L., L. Sasková, P. Pallová, J. Janecek, J. Novotná, A. Ulrych, J. Echenique,  
368 M.C. Trombe & P. Branny, (2005) Characterization of a eukaryotic type  
369 serine/threonine protein kinase and protein phosphatase of *Streptococcus*  
370 *pneumoniae* and identification of kinase substrates. *FEBS J* **272**: 1243-1254.
- 371 Pozzi, G., L. Masala, F. Iannelli, R. Manganelli, L.S. Havarstein, L. Piccoli, D. Simon &  
372 D.A. Morrison, (1996) Competence for genetic transformation in encapsulated  
373 strains of *Streptococcus pneumoniae*: two allelic variants of the peptide  
374 pheromone. *J Bacteriol* **178**: 6087-6090.
- 375 Ramos-Montanez, S., H.C. Tsui, K.J. Wayne, J.L. Morris, L.E. Peters, F. Zhang, K.M.  
376 Kazmierczak, L.T. Sham & M.E. Winkler, (2008) Polymorphism and regulation of  
377 the spxB (pyruvate oxidase) virulence factor gene by a CBS-HotDog domain  
378 protein (SpxR) in serotype 2 *Streptococcus pneumoniae*. *Molec Microbiol* **67**:  
379 729-746.
- 380 Rantanen, M.K., L. Lehtio, L. Rajagopal, C.E. Rubens & A. Goldman, (2007) Structure  
381 of *Streptococcus agalactiae* serine/threonine phosphatase. The subdomain  
382 conformation is coupled to the binding of a third metal ion. *FEBS J* **274**: 3128-  
383 3137.
- 384 Schrodinger, L., The PyMOL molecular graphics system, version 1.8.

- 385 Tsui, H.C., M.J. Boersma, S.A. Vella, O. Kocaoglu, E. Kuru, J.K. Peceny, E.E. Carlson,  
386 M.S. VanNieuwenhze, Y.V. Brun, S.L. Shaw & M.E. Winkler, (2014) Pbp2x  
387 localizes separately from Pbp2b and other peptidoglycan synthesis proteins  
388 during later stages of cell division of *Streptococcus pneumoniae* D39. *Molec*  
389 *Microbiol* **94**: 21-40.
- 390 Tsui, H-C..T., J.J. Zheng, A.N. Magallon, J.D. Ryan, R. Yunck, B.E. Rued, T.G.  
391 Bernhardt & M.E. Winkler, (2016) Suppression of a deletion mutation in the gene  
392 encoding essential PBP2b reveals a new lytic transglycosylase involved in  
393 peripheral peptidoglycan synthesis in *Streptococcus pneumoniae* D39. *Molec*  
394 *Microbiol* **100**: 1039-1065.
- 395 Tu, Y., F. Li & C. Wu, (1998) Nck-2, a novel Src homology2/3-containing adaptor protein  
396 that interacts with the LIM-only protein PINCH and components of growth factor  
397 receptor kinase-signaling pathways. *Mol Biol Cell* **9**: 3367-3382.
- 398 Waldo, G.S., B.M. Standish, J. Berendzen & T.C. Terwilliger, (1999) Rapid protein-  
399 folding assay using green fluorescent protein. *Nat Biotechnol* **17**: 691-695.
- 400 Wayne, K.J., L.T. Sham, H.C. Tsui, A.D. Gutu, S.M. Barendt, S.K. Keen & M.E. Winkler,  
401 (2010) Localization and cellular amounts of the WalRKJ (VicRKX) two-  
402 component regulatory system proteins in serotype 2 *Streptococcus pneumoniae*.  
403 *J Bacteriol* **192**: 4388-4394.

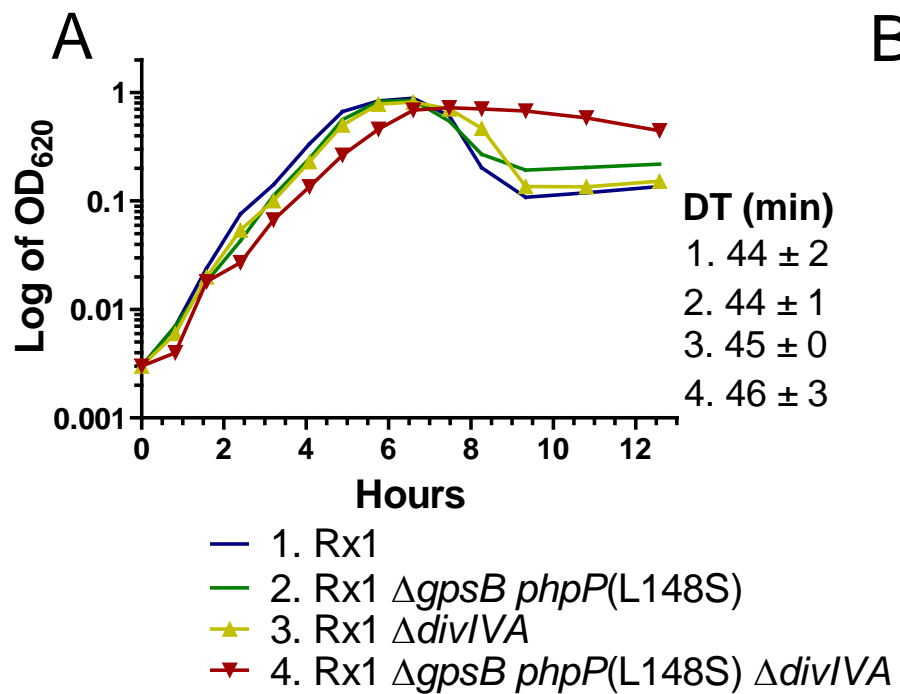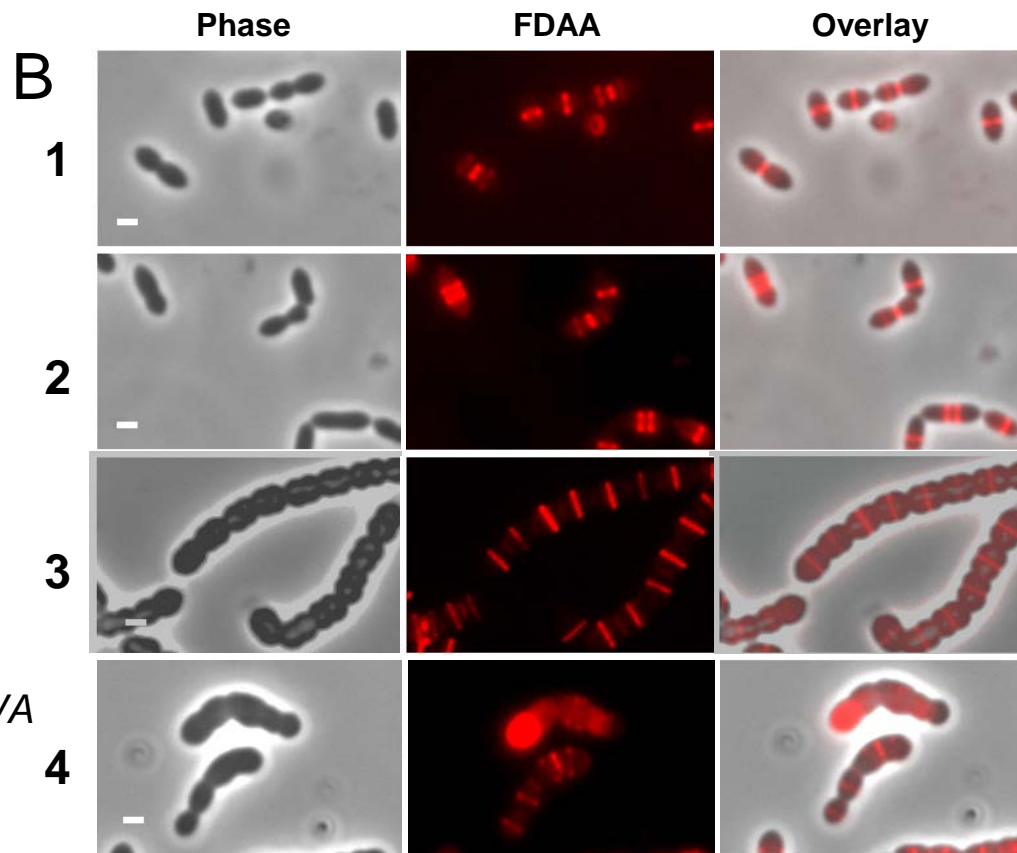

**Fig. S1**

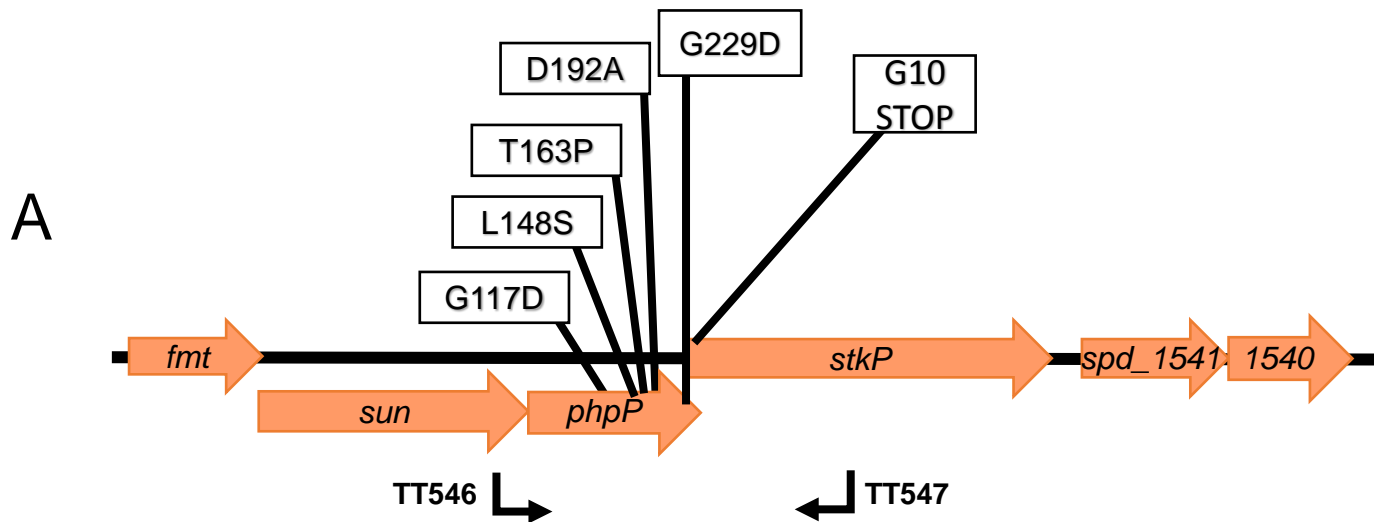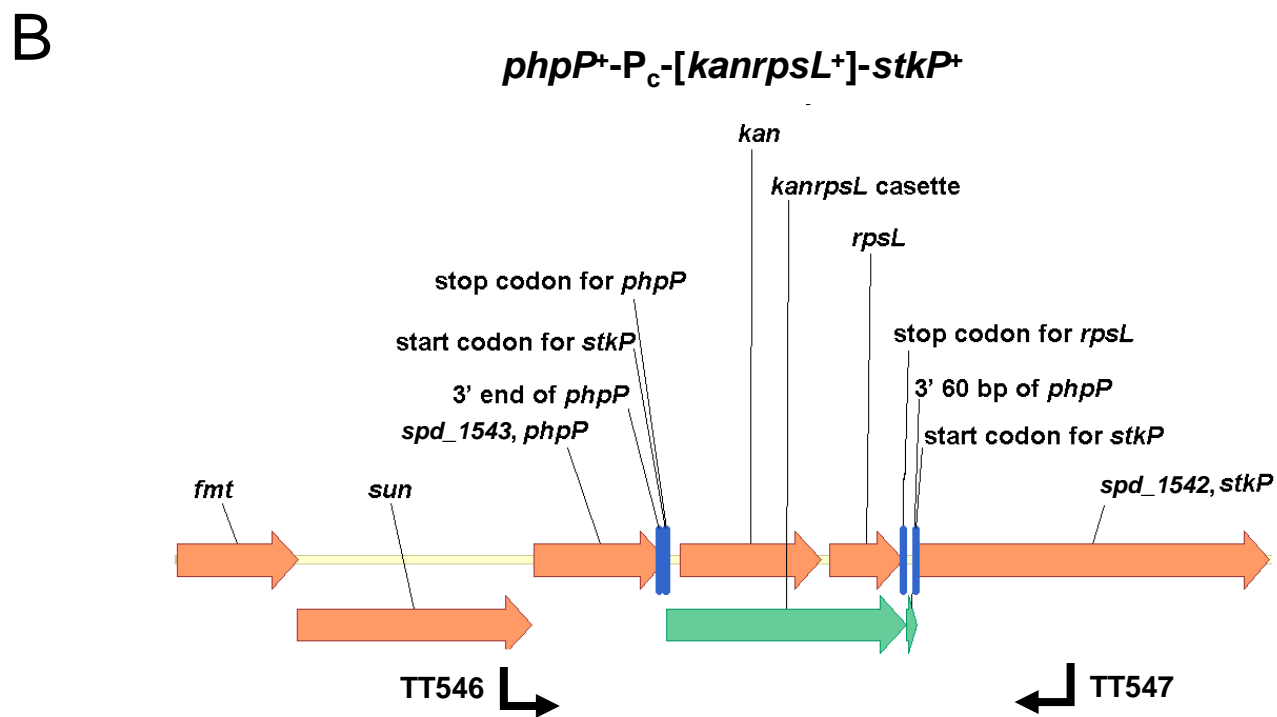

**Fig. S2**

**A**deletion present  
in Rx1 backgrounddeletions in *sup2* and *sup3*  
suppressors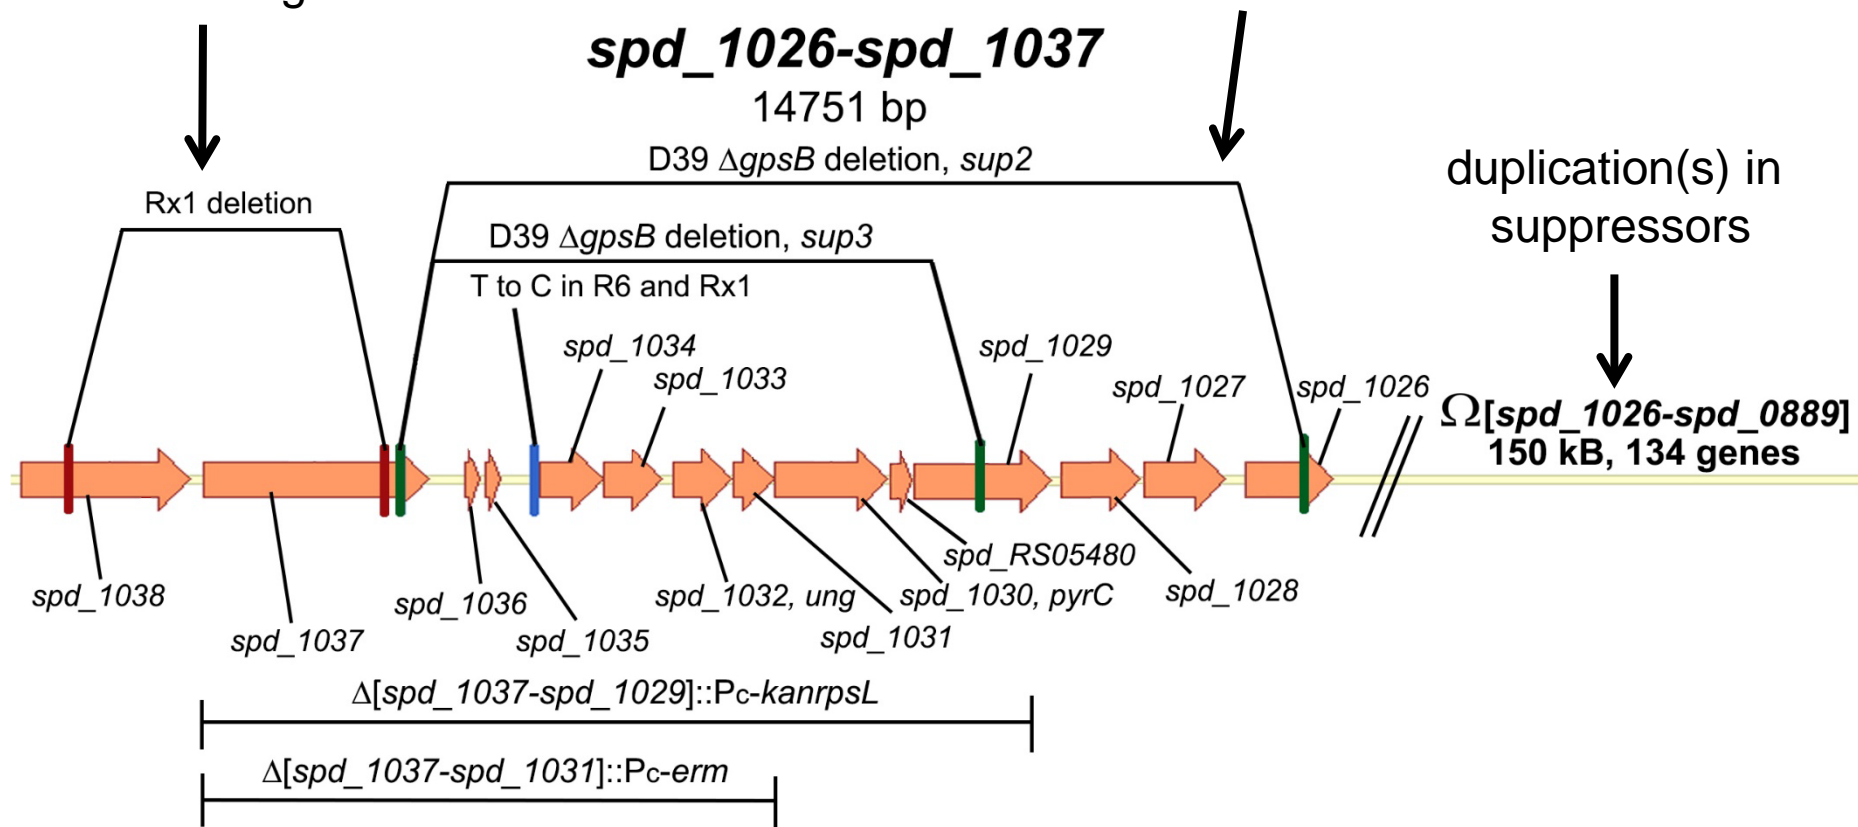**Fig. S3A**



**B**

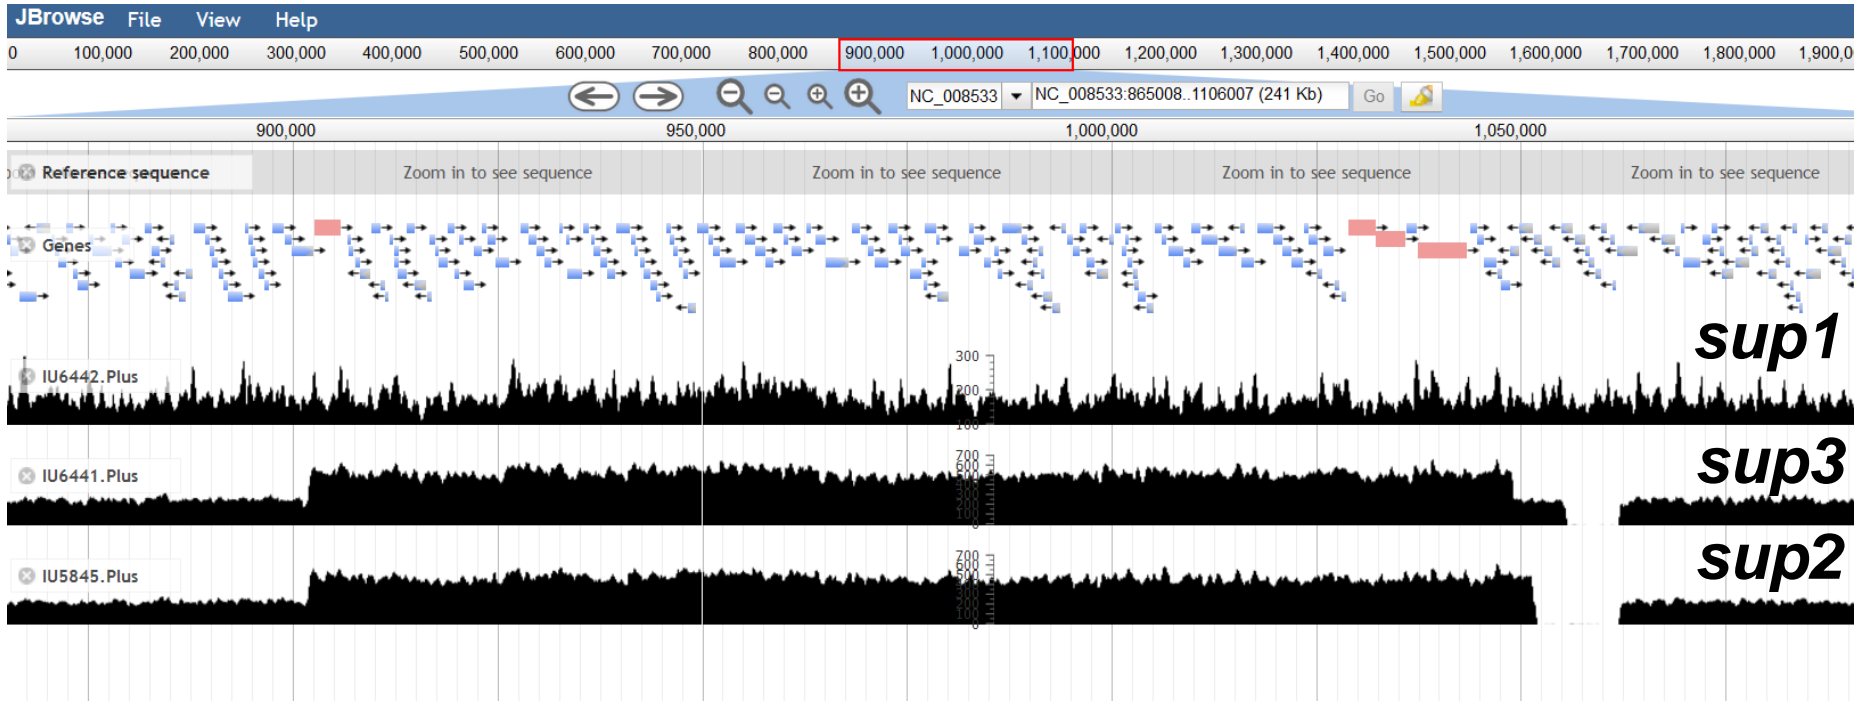

**Fig. S3B**

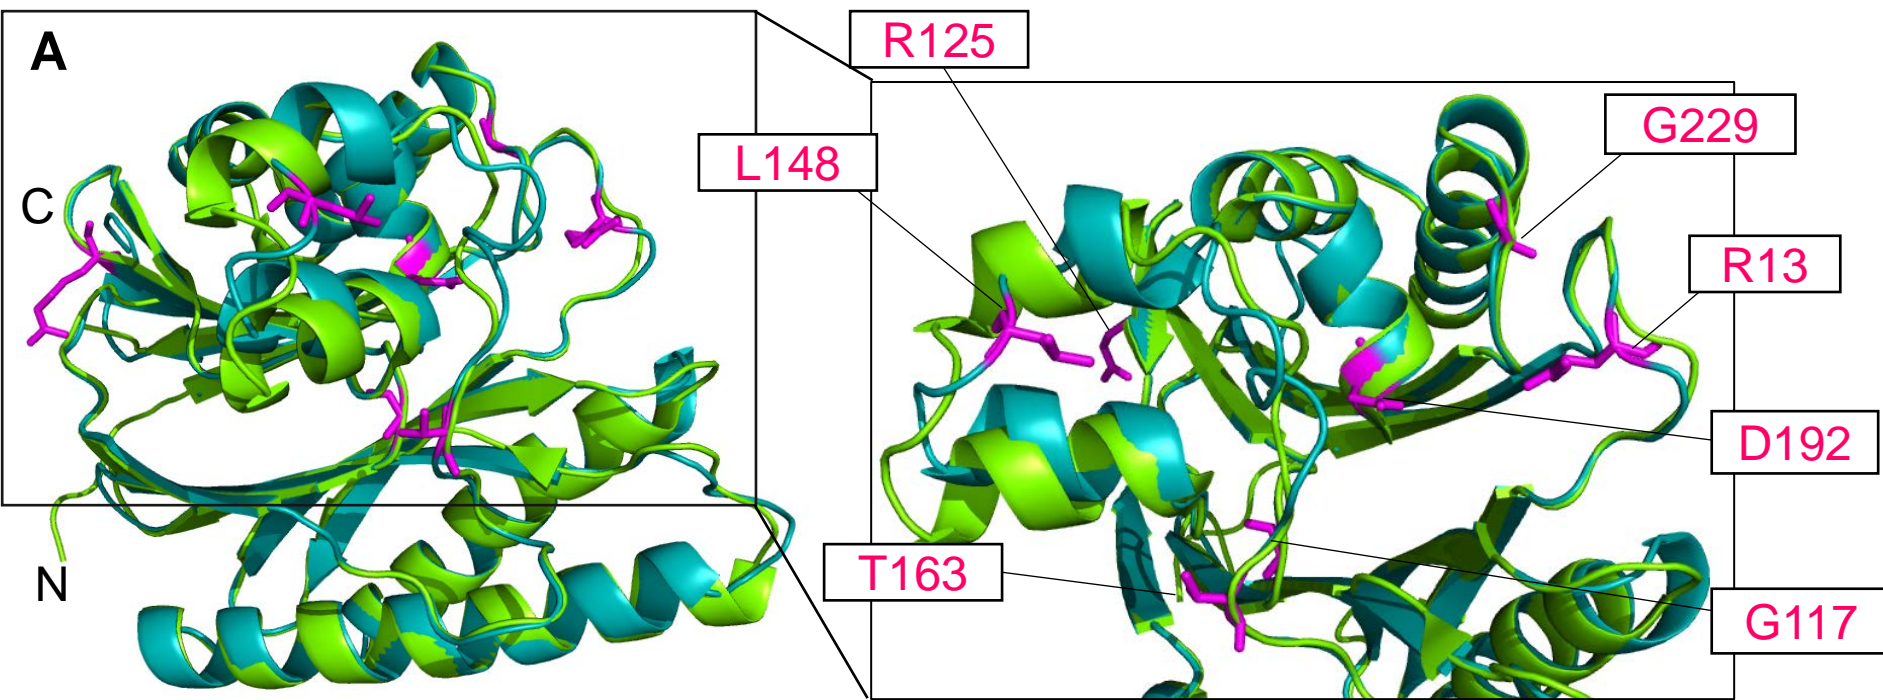

**B** Reduced protein phosphatase activity of PhpP mutant proteins

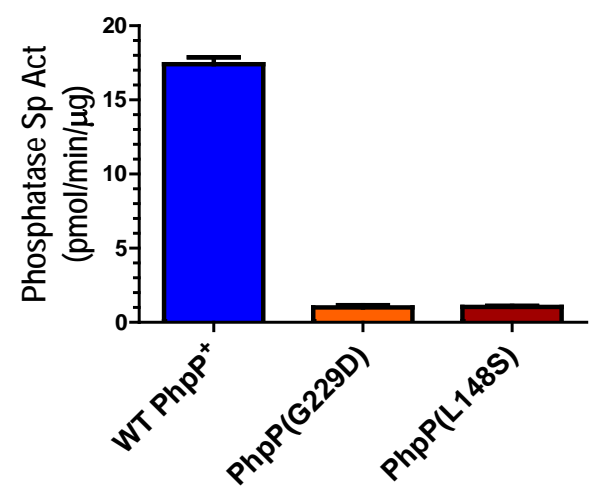

**Fig. S4**

# Changes in PhpP suppressors are at conserved amino acids

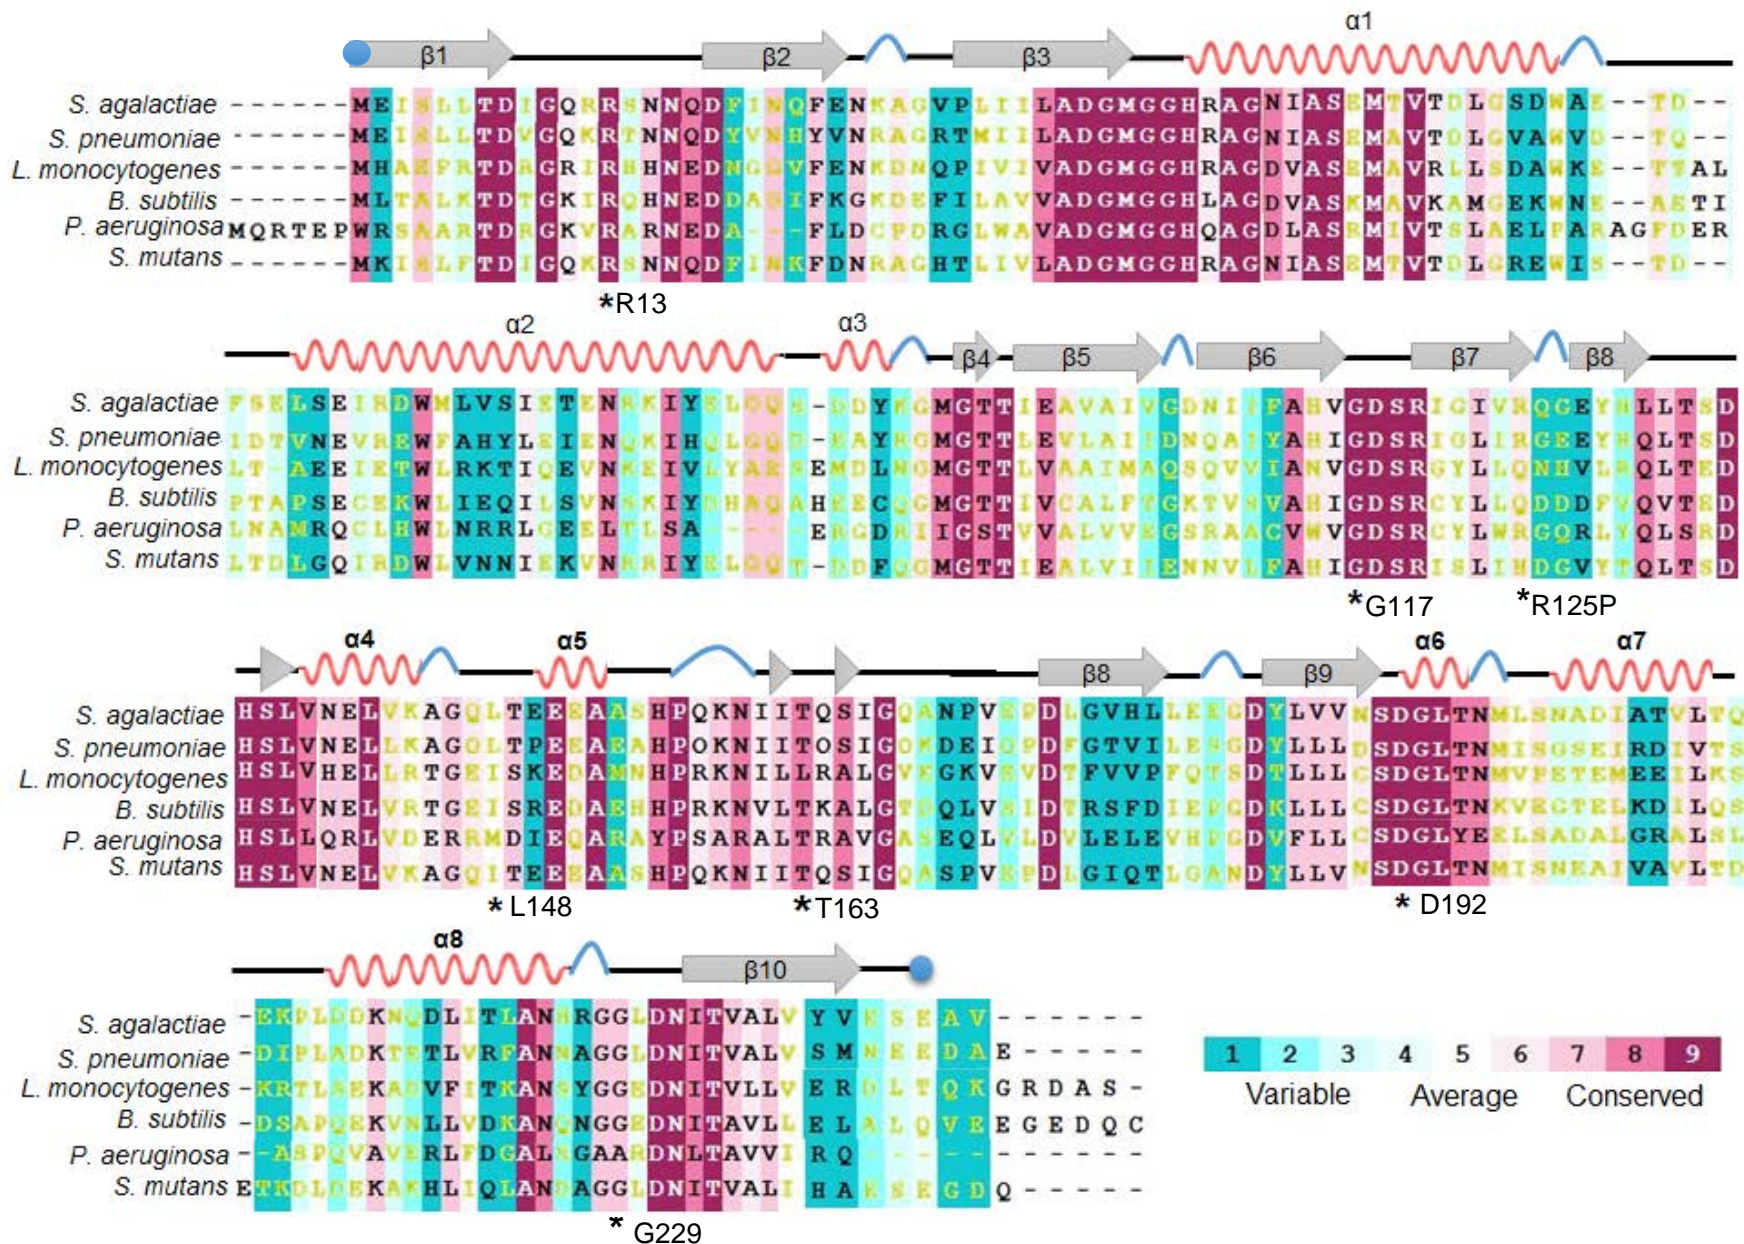

Fig. S5

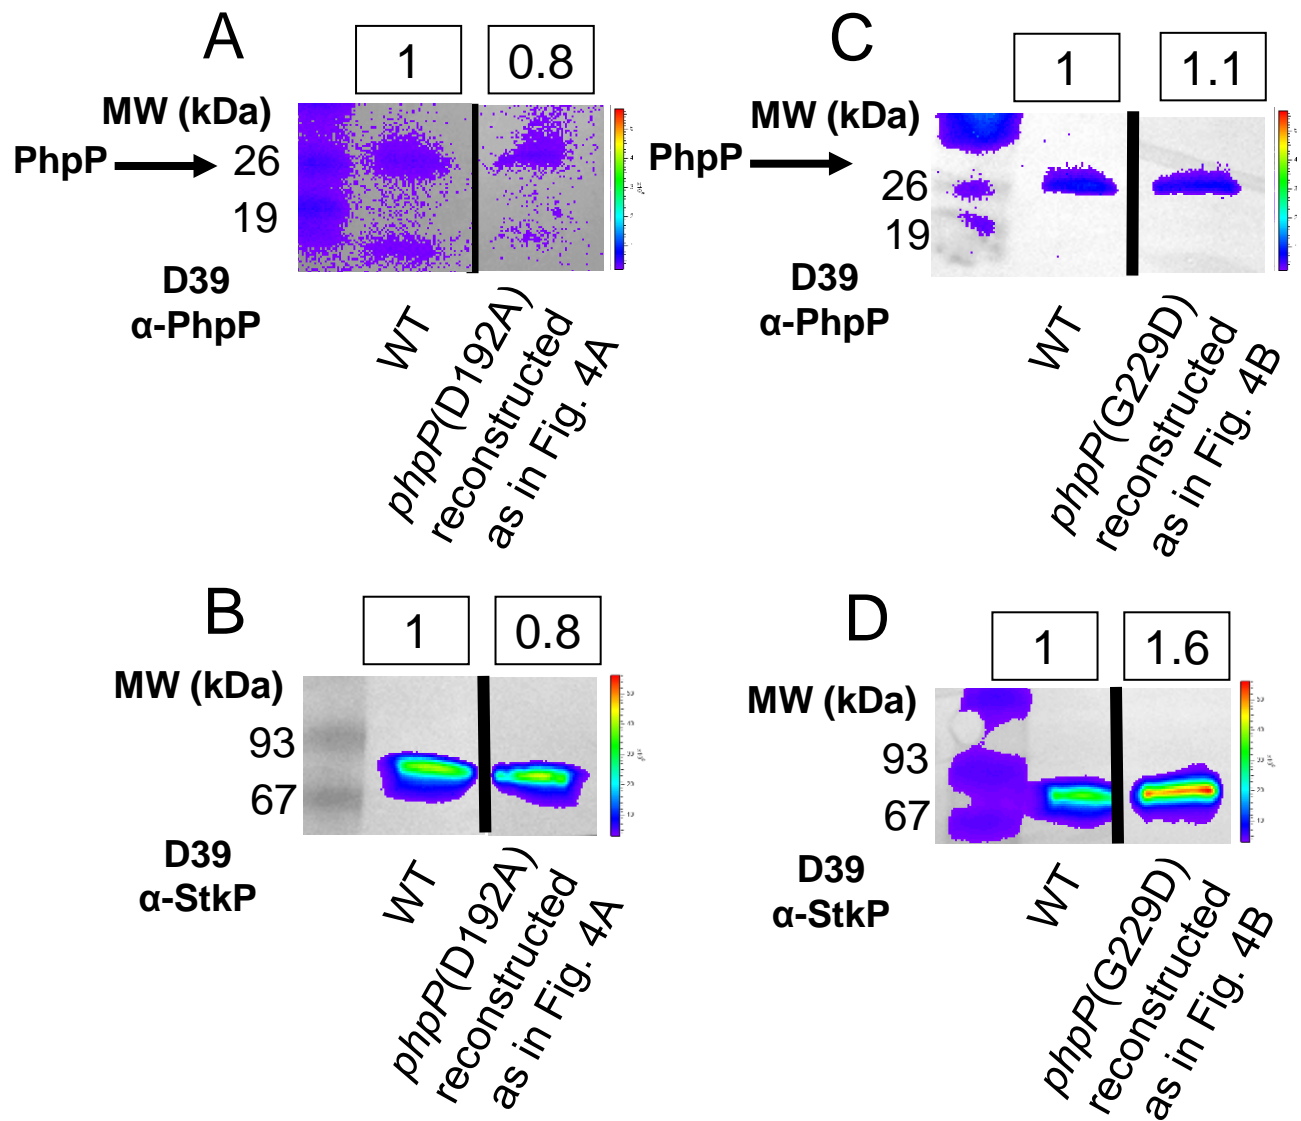

Fig. S6

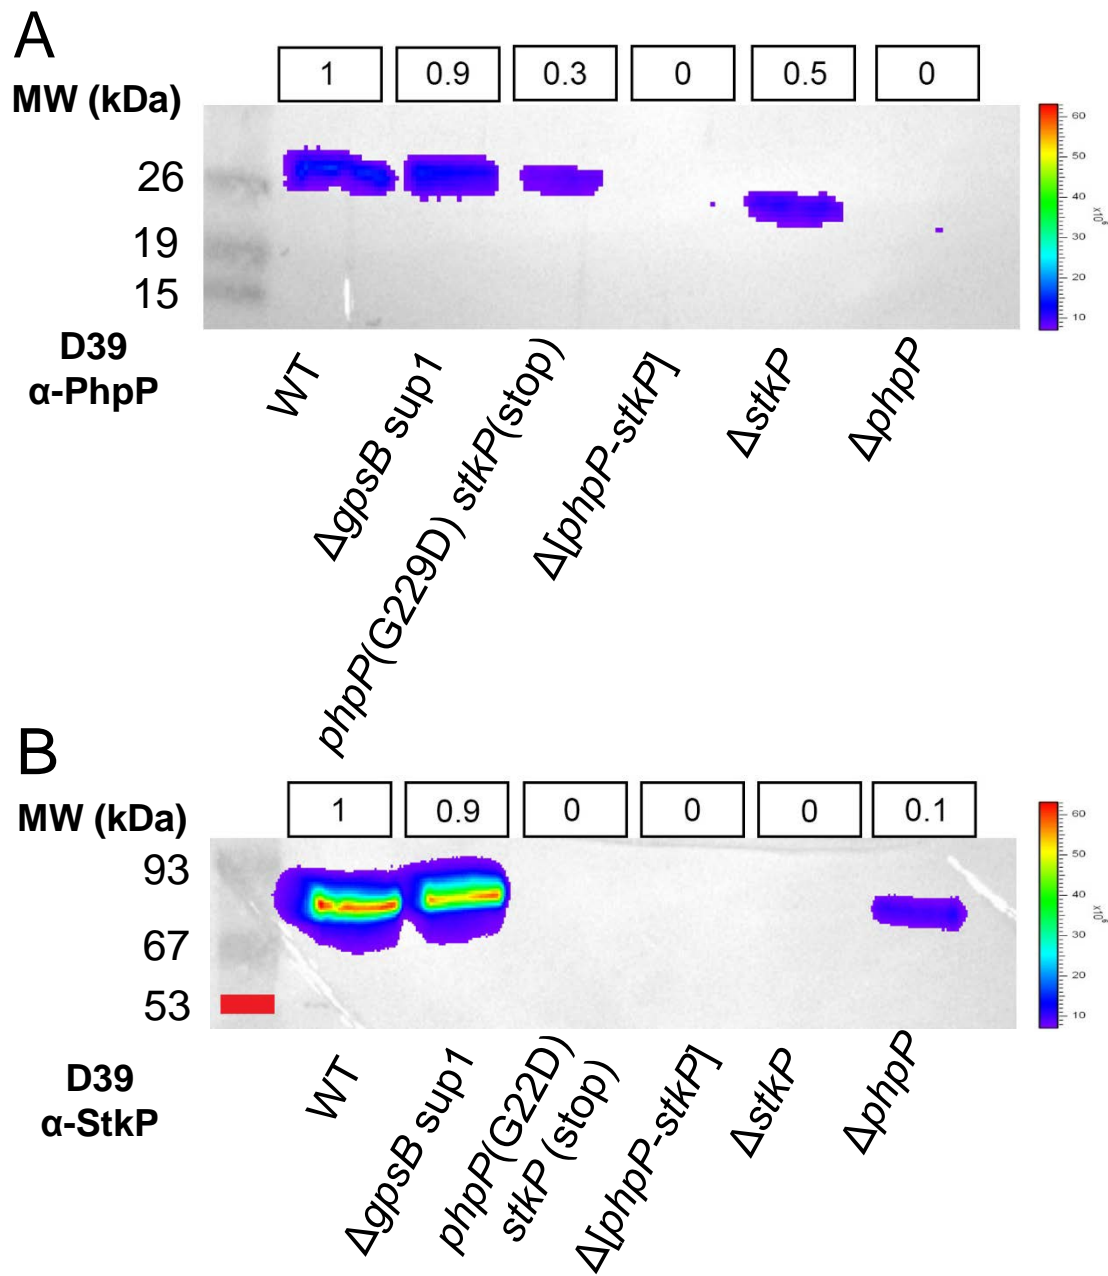

Fig. S7

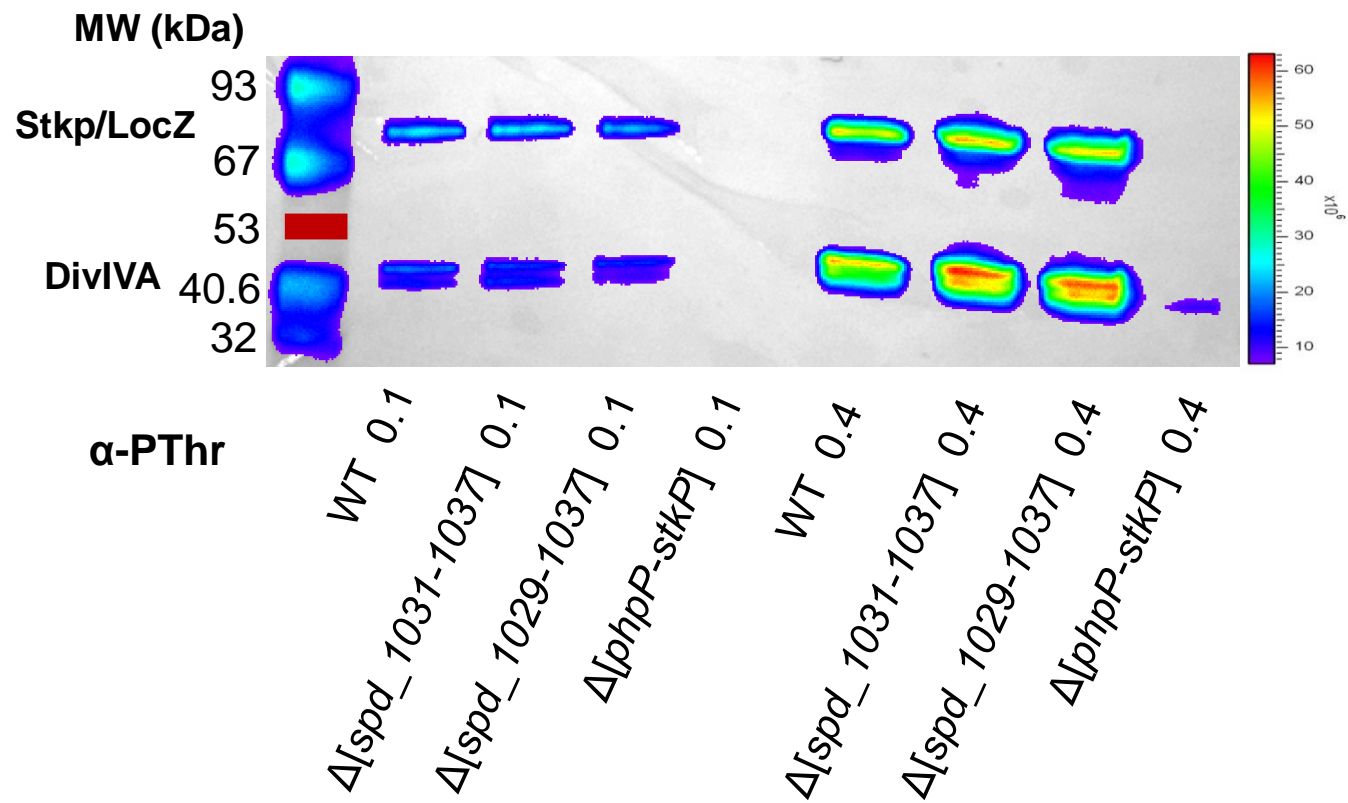

**Fig. S8**

A

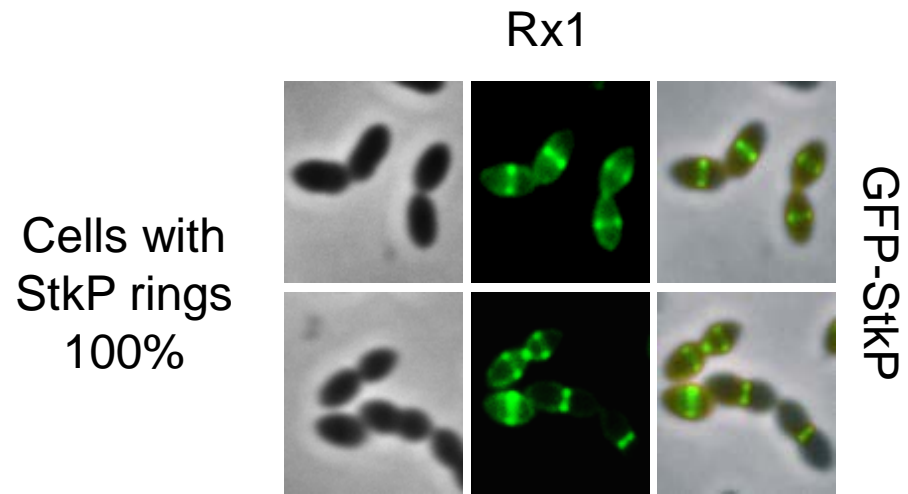

B

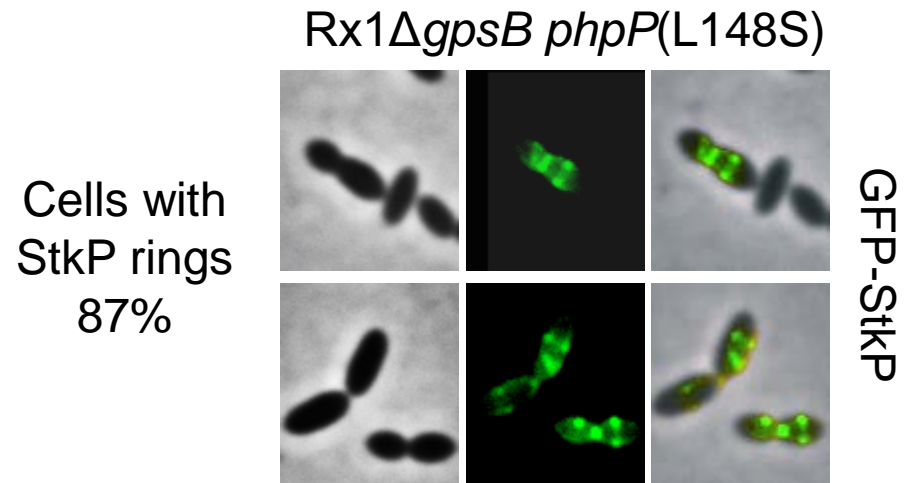

Fig. S9

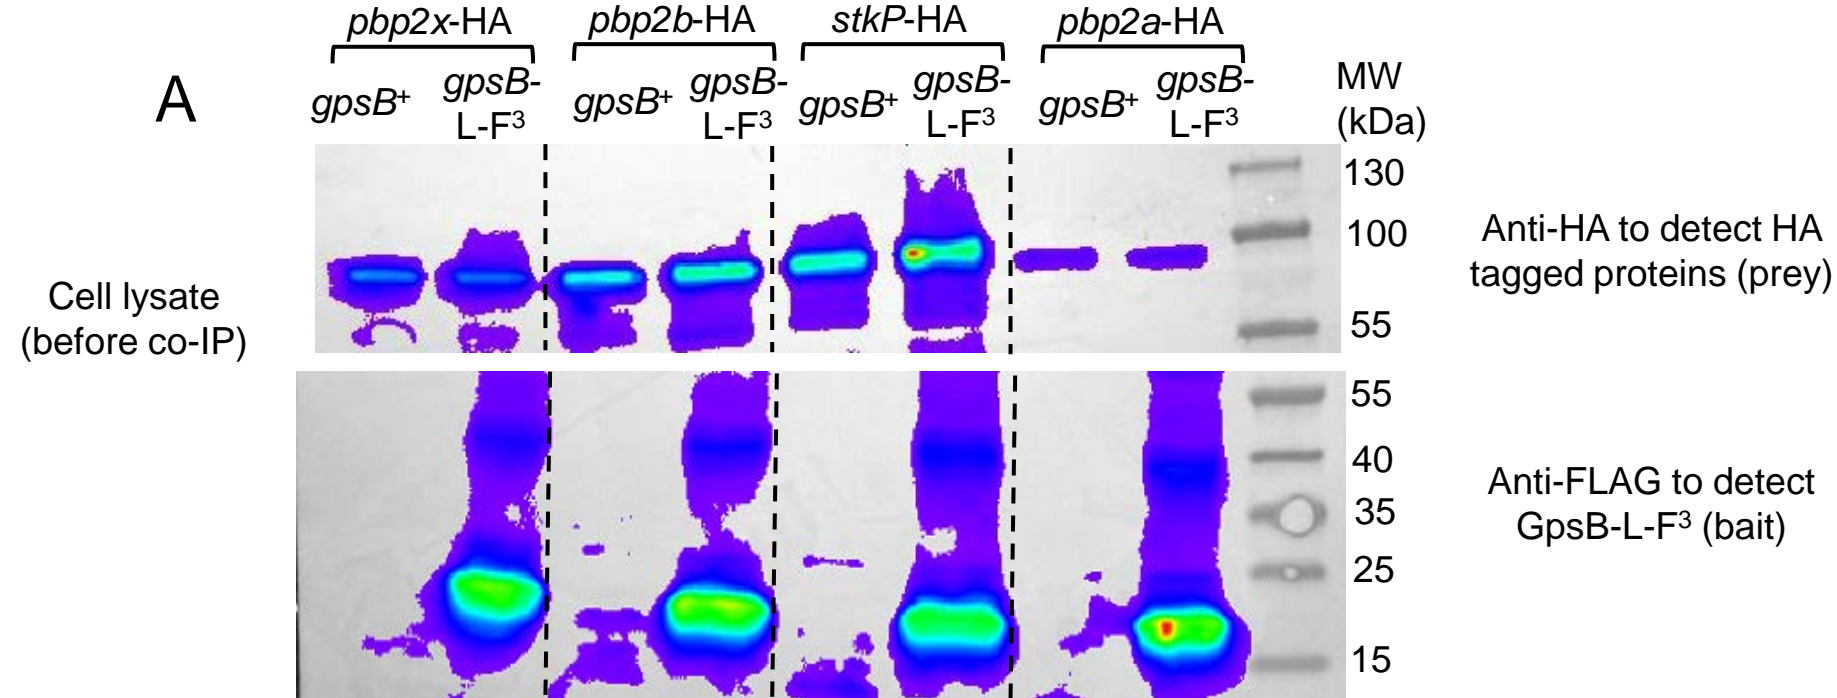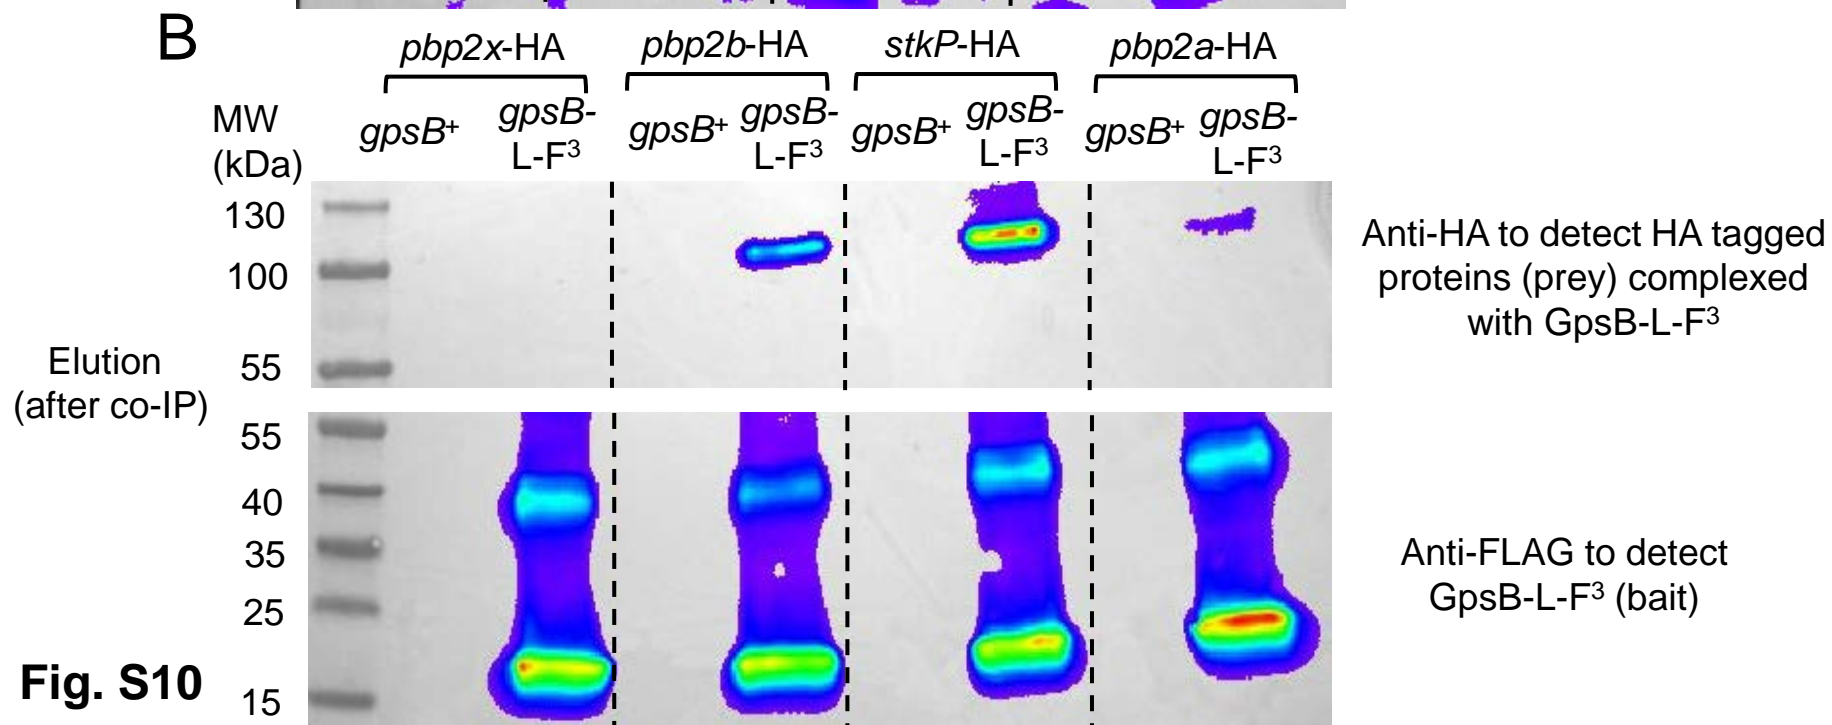

**Fig. S10**



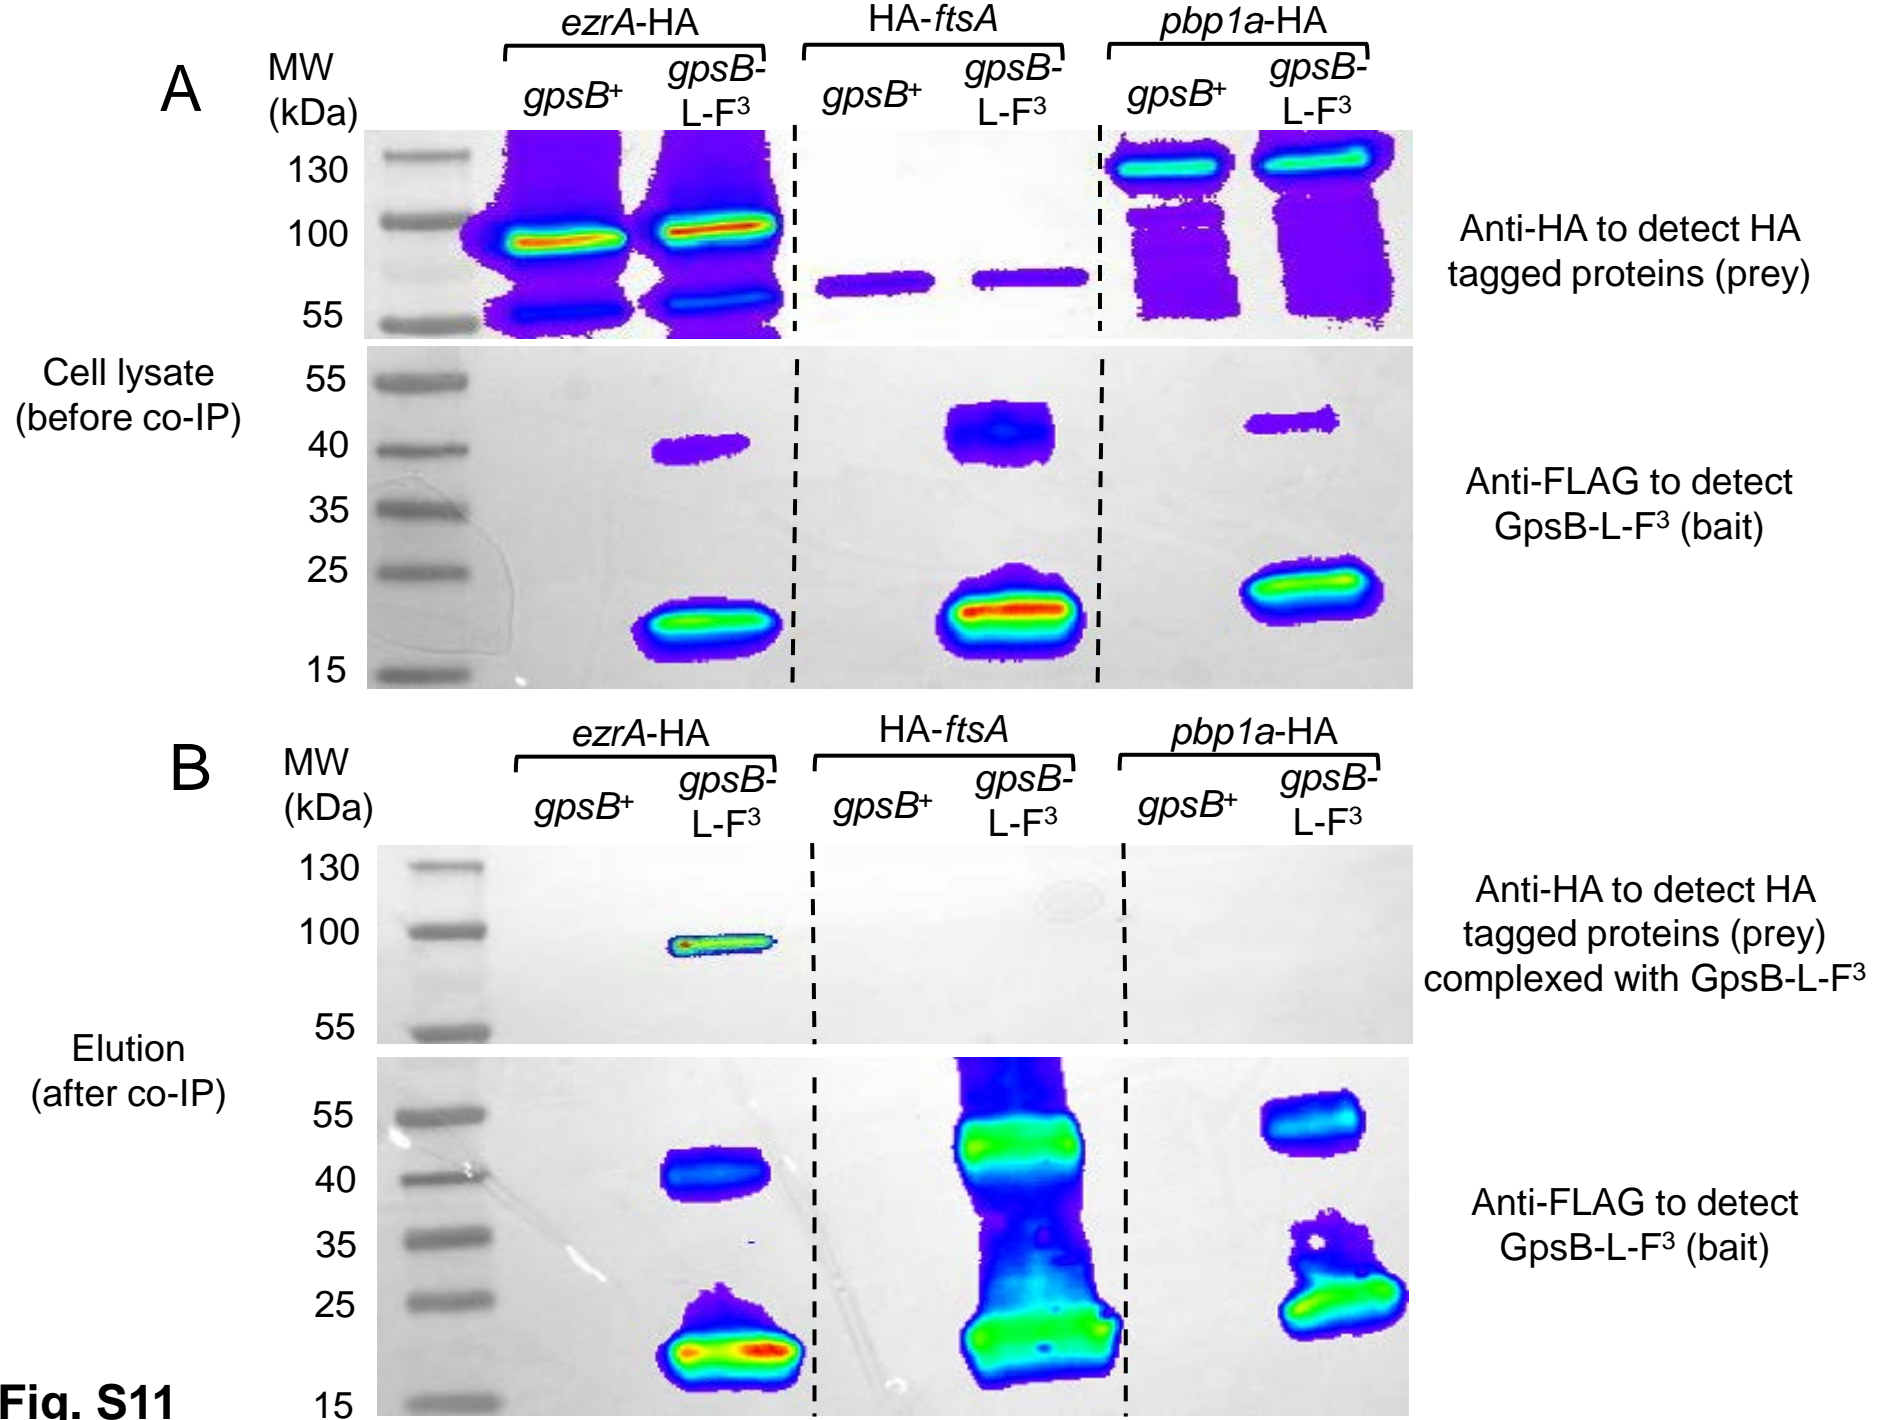

**Fig. S11**

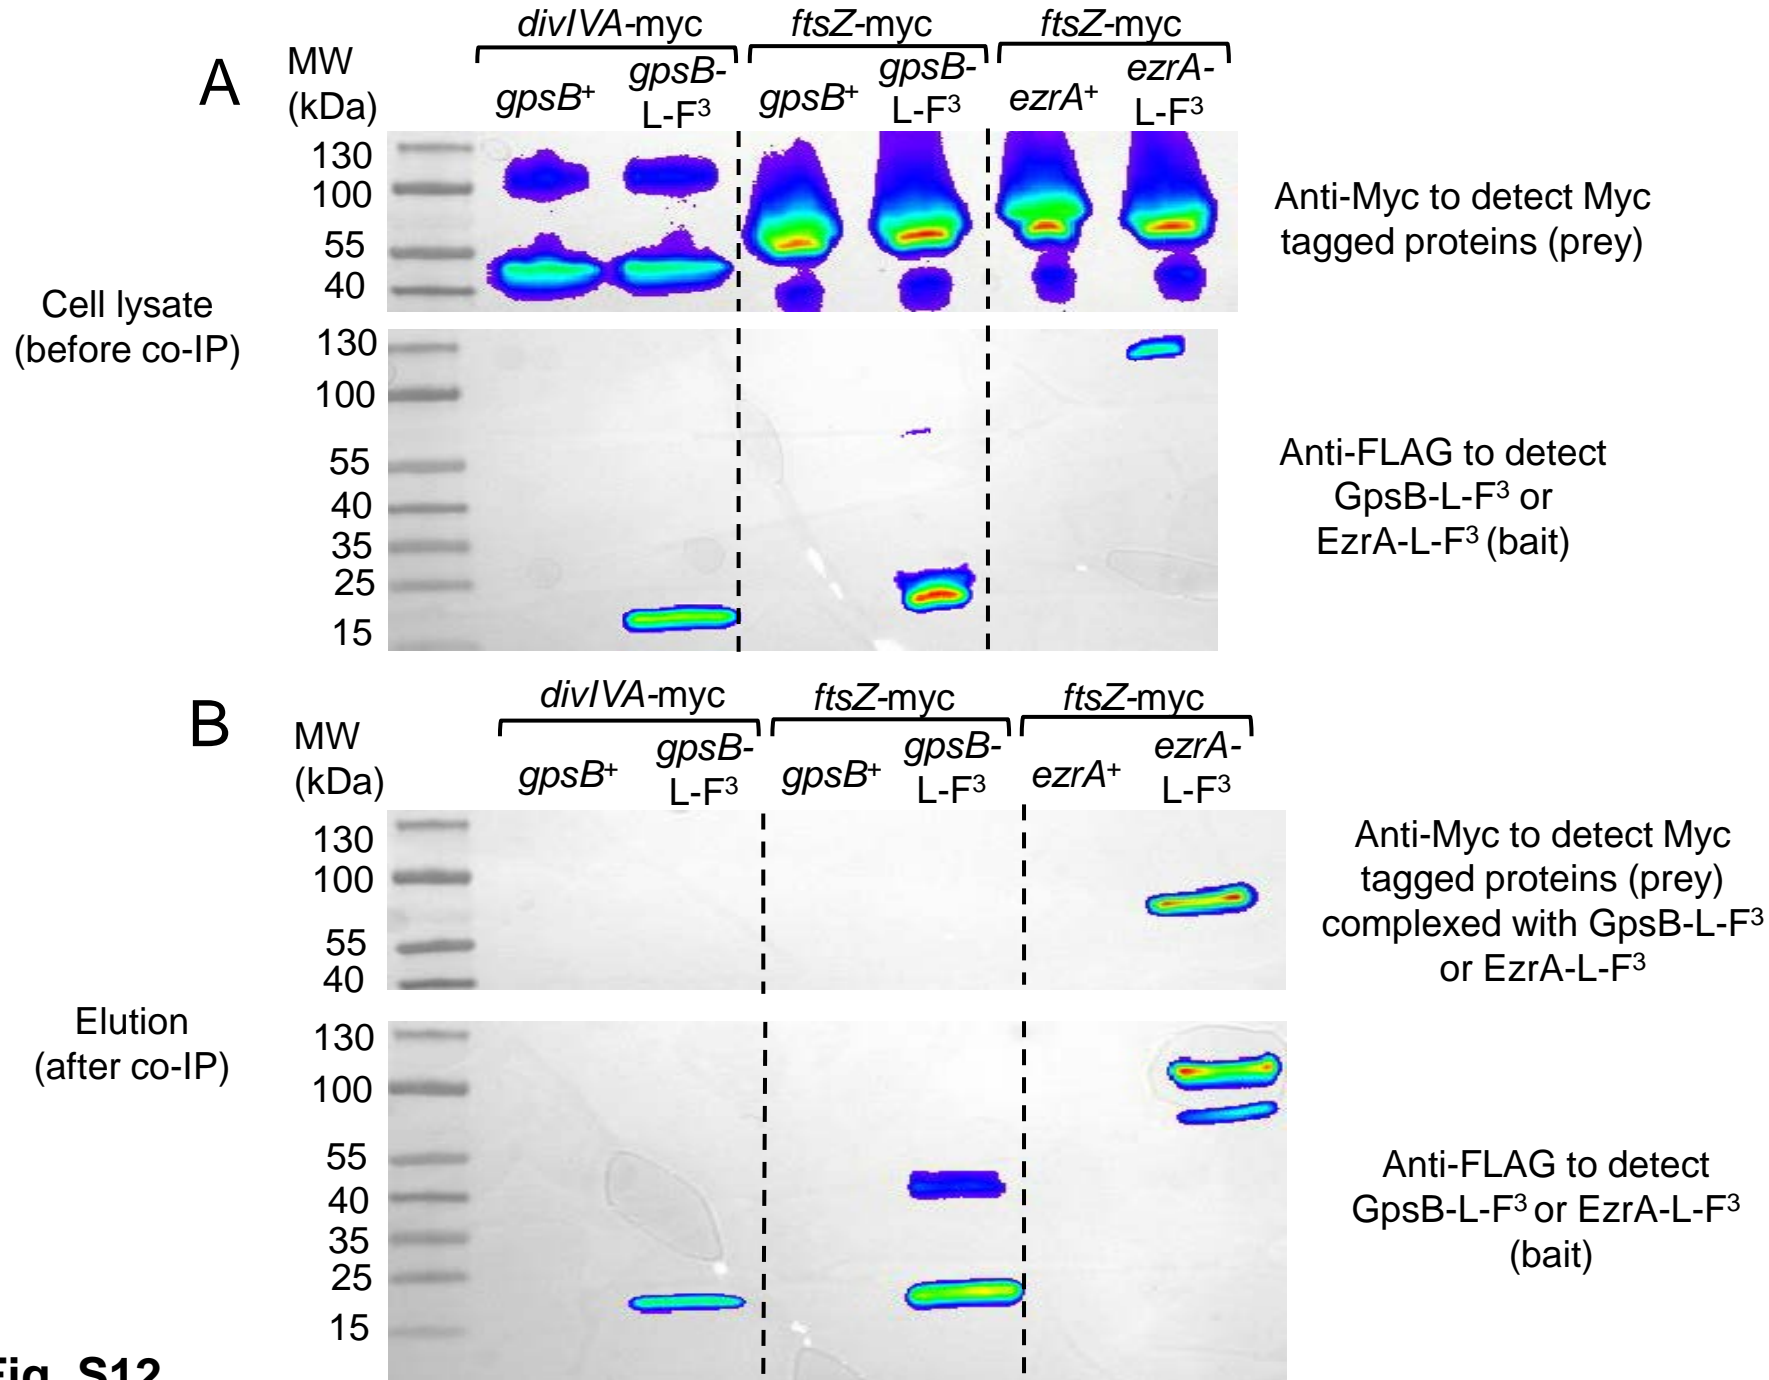

**Fig. S12**

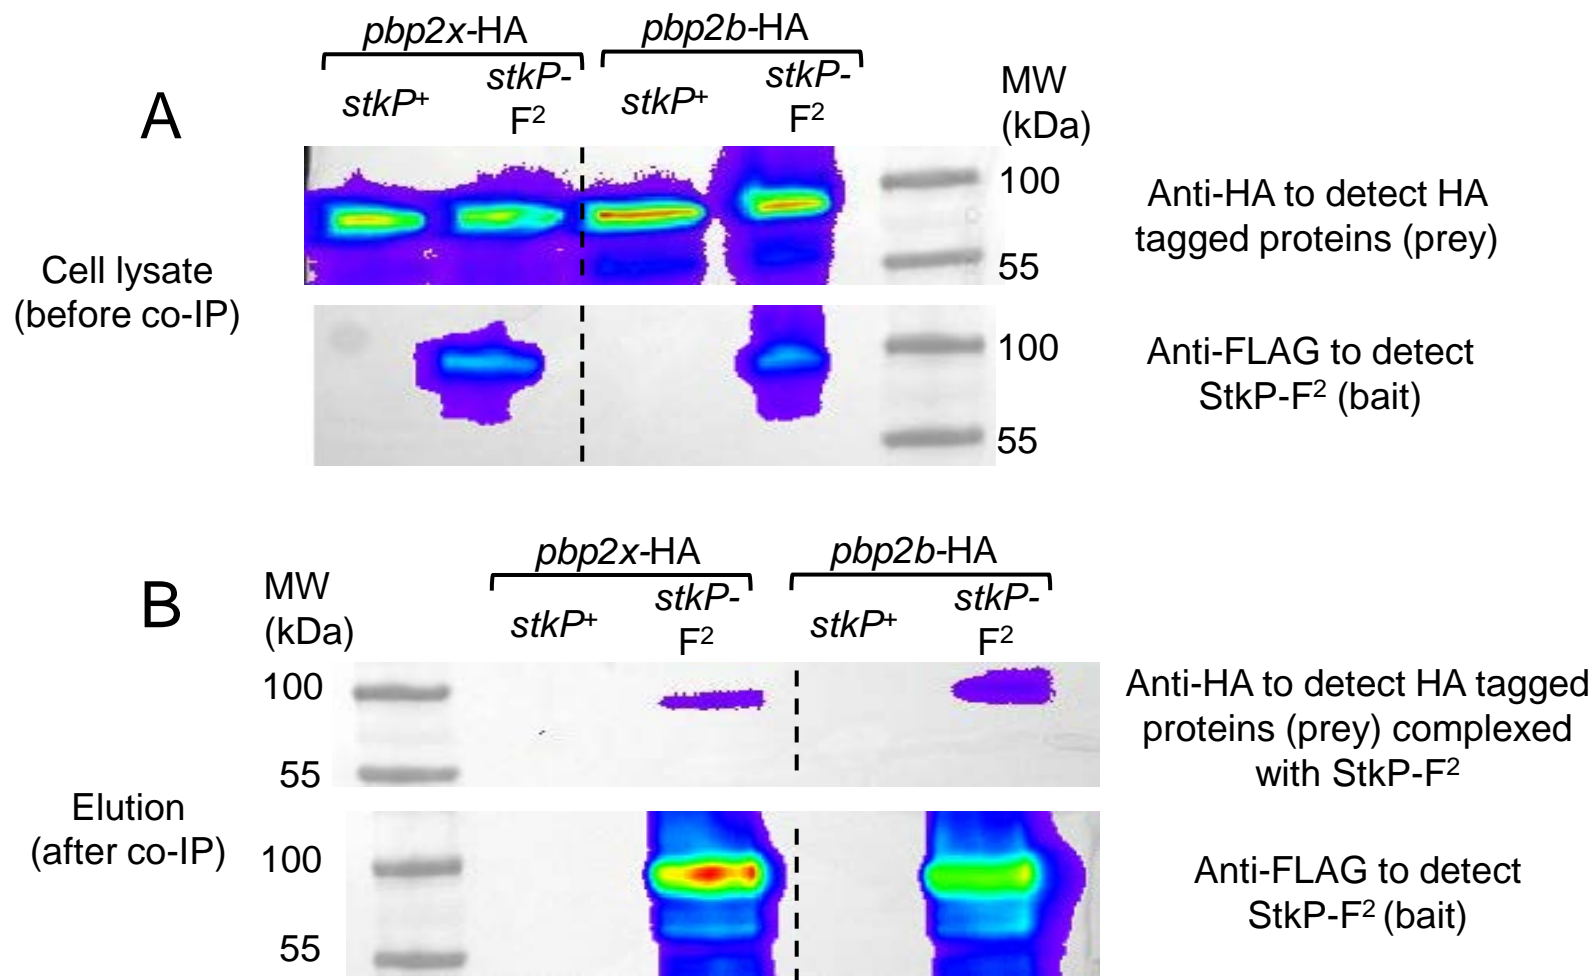

**Fig. S13**

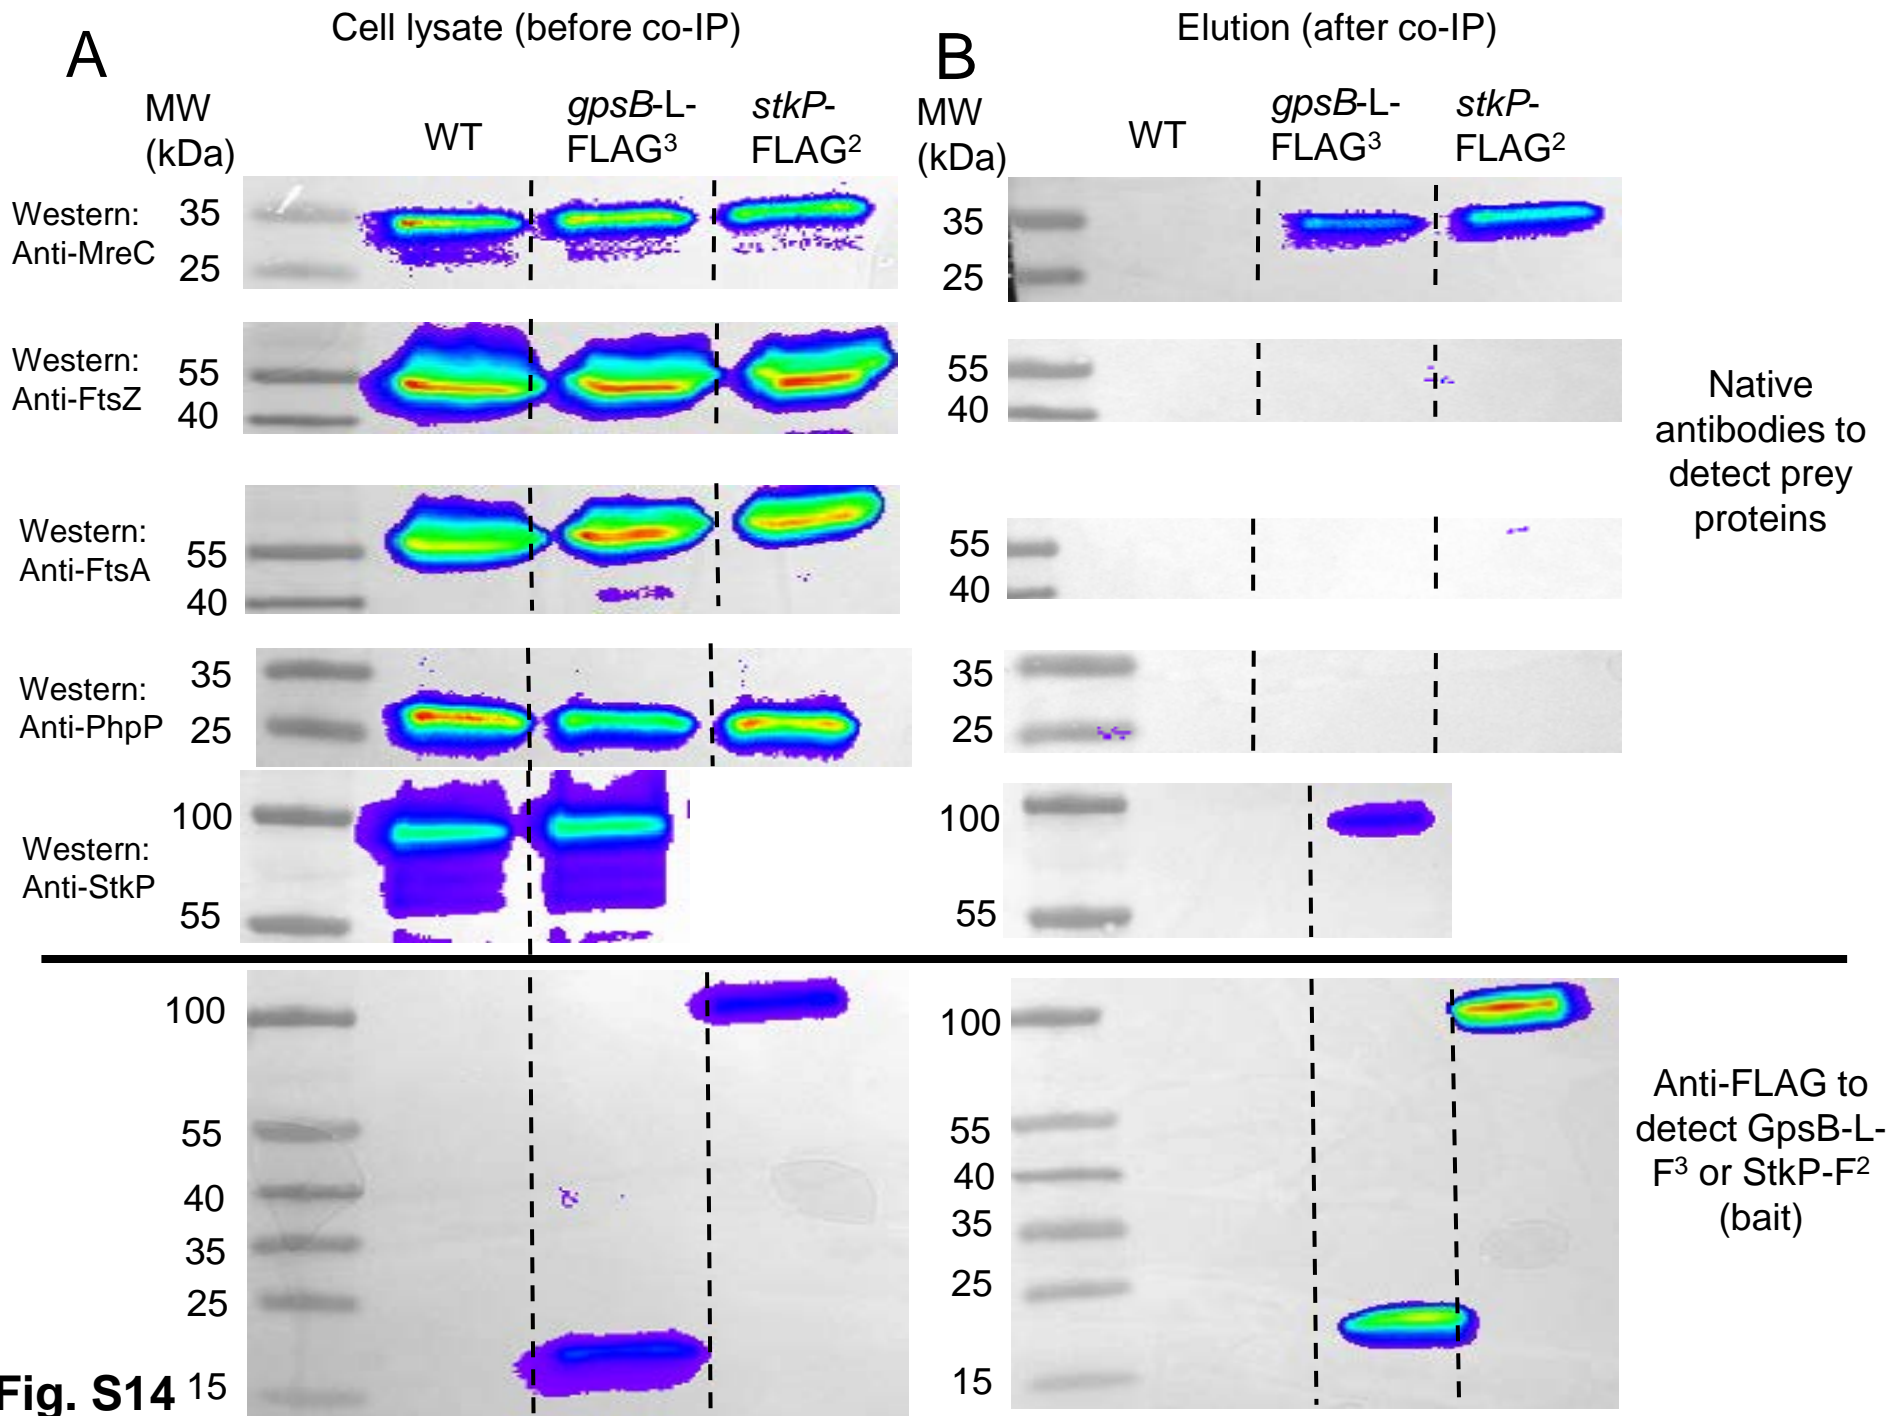

**Fig. S14**

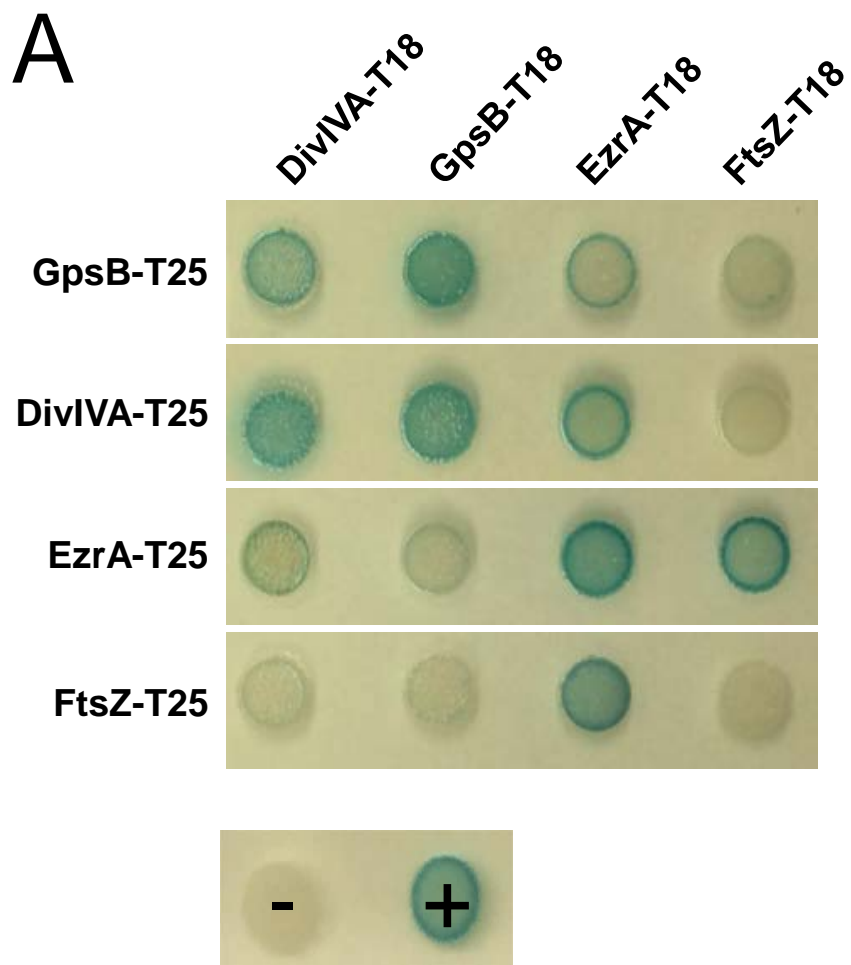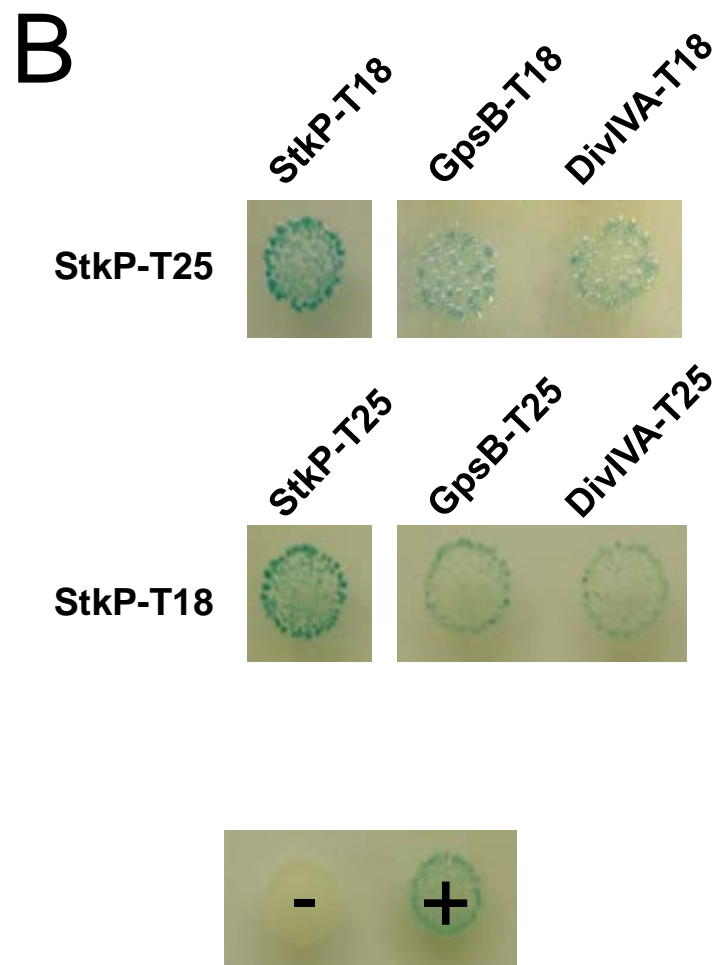

Fig. S15
